1           **A deep-sea sulfate reducing bacterium directs the formation**  
2                           **of zero-valent sulfur via sulfide oxidation**

3           Rui Liu<sup>1,2,5</sup>, Yeqi Shan<sup>1,2,3,5</sup>, Shichuan Xi<sup>3,4,5</sup>, Xin Zhang<sup>4,5</sup>, Chaomin Sun<sup>1,2,5\*</sup>

4           <sup>1</sup>CAS and Shandong Province Key Laboratory of Experimental Marine Biology & Center of  
5           Deep Sea Research, Institute of Oceanology, Chinese Academy of Sciences, Qingdao, China

6           <sup>2</sup>Laboratory for Marine Biology and Biotechnology, Qingdao National Laboratory for Marine  
7           Science and Technology, Qingdao, China

8           <sup>3</sup>College of Earth Science, University of Chinese Academy of Sciences, Beijing, China

9           <sup>4</sup>CAS Key Laboratory of Marine Geology and Environment & Center of Deep Sea Research,  
10           Institute of Oceanology, Chinese Academy of Sciences, Qingdao, China

11           <sup>5</sup>Center of Ocean Mega-Science, Chinese Academy of Sciences, Qingdao, China

12

13           \* Corresponding author

14           Chaomin Sun     Tel.: +86 532 82898857; fax: +86 532 82898857.

15                           E-mail address: [sunchaomin@qdio.ac.cn](mailto:sunchaomin@qdio.ac.cn)

16

17           **Key words:** sulfate reducing bacteria, cold seep, zero-valent sulfur, in situ,

18                           sulfide oxidation

19           **Running title:** Formation of zero-valent sulfur by SRB

20

21

22

23 **Abstract**

24 Zero-valent sulfur (ZVS) is a critical intermediate in the biogeochemical sulfur cycle.  
25 Up to date, sulfur oxidizing bacteria have been demonstrated to dominate the  
26 formation of ZVS. In contrast, formation of ZVS mediated by sulfate reducing  
27 bacteria (SRB) has been rarely reported. Here, we report for the first time that a  
28 typical sulfate reducing bacterium *Desulfovibrio marinus* CS1 directs the formation of  
29 ZVS via sulfide oxidation. In combination with proteomic analysis and protein  
30 activity assays, thiosulfate reductase (PhsA) and sulfide: quinone oxidoreductase  
31 (SQR) were demonstrated to play key roles in driving ZVS formation. In this process,  
32 PhsA catalyzed thiosulfate to form sulfide, which was then oxidized by SQR to form  
33 ZVS. Consistently, the expressions of PhsA and SQR were significantly up-regulated  
34 in strain CS1 when cultured in the deep-sea cold seep, strongly indicating strain CS1  
35 might form ZVS in its real inhabiting niches. Notably, homologs of *phsA* and *sqr*  
36 widely distributed in the metagenomes of deep-sea SRB. Given the high abundance of  
37 SRB in cold seeps, it is reasonable to propose that SRB might greatly contribute to the  
38 formation of ZVS in the deep-sea environments. Our findings add a new aspect to the  
39 current understanding of the source of ZVS.

40

41

42

43

44

## 45 **Introduction**

46 Zero-valent sulfur (ZVS) is a central intermediate in the biogeochemical sulfur  
47 cycle<sup>1-3</sup>, and forms conspicuous accumulations at sediment surface under the sea floor  
48 including the cold seep and the hydrothermal systems<sup>4-6</sup>. In marine environments,  
49 ZVS commonly occurs in some forms such as polysulfides ( $S_n^{2-}$ ), polymeric sulfur ( $S_n$ )  
50 or cyclooctasulfur ( $S_8$ )<sup>7,8</sup>. The production of ZVS has been regarded as a bio-signature  
51 of sulfur-oxidizing microorganisms<sup>9,10</sup>. The process of ZVS production begins with  
52 the formation of polysulfide through the oxidation of thiosulfate or sulfide<sup>3,11-13</sup>. For  
53 the formation process of ZVS mediated by thiosulfate oxidation, there are at least four  
54 pathways identified in the sulfur oxidizing bacteria (SOB)<sup>11,13</sup>, including Sox  
55 pathway<sup>14</sup>, tetrathionate ( $S_4I$ ) intermediate pathway<sup>15</sup>, Sox- $S_4I$  interaction system<sup>16</sup>  
56 and a novel pathway mediated by thiosulfate dehydrogenase (TsdA) and  
57 thiosulfohydrolase (SoxB)<sup>17</sup>. For the formation process of ZVS mediated by sulfide  
58 oxidation, sulfide: quinone oxidoreductase (SQR) has been proposed to be the key  
59 enzyme to catalyze the formation of ZVS in various sulfur-oxidizing  
60 Alphaproteobacteria and Gammaproteobacteria<sup>11,12,18</sup>. SQR is a membrane associated  
61 protein that oxidizes sulfide to ZVS and transfers electrons to the membrane quinone  
62 pool with flavin adenine dinucleotide<sup>19</sup>. As a key sulfide detoxifying enzyme, SQR is  
63 present in many bacteria, archaea and the mitochondria of eukaryotic cells, classified  
64 into six types (Type I to VI)<sup>19-21</sup>. Since no more pure cultures containing the *sqr* gene  
65 are available<sup>22,23</sup>, the function of SQR in *D*-proteobacteria (e.g. most of typical sulfate  
66 reducing bacteria) is obscure.

67 Up to date, most of progresses about the formation of ZVS are related to sulfur  
68 oxidizing bacteria but rarely associated with sulfate reducing bacteria (SRB). Notably,  
69 a novel pathway of ZVS generation mediated by the dissimilatory sulfate reduction  
70 has been recently observed in a syntrophic consortium of anaerobic methanotrophic  
71 archaea (ANME) and SRB<sup>24-26</sup>. ANME were firstly proposed to drive the formation of  
72 ZVS via coupling the anaerobic methane oxidation (AOM) with the sulfate  
73 reduction<sup>25</sup>, which provided experimental evidence for the first time to confirm the  
74 ZVS generation from the dissimilatory sulfate reduction. However, this proposal was  
75 challenged by other researchers, who insisted that the passage of sulfur species by  
76 ANME as metabolic intermediates for their SRB partners was unlikely<sup>27</sup>. In addition,  
77 based on a methanogenic bioreactor system and metagenomics approaches, some  
78 researchers proposed a novel ZVS formation pathway mediated by dissimilatory  
79 sulfate reduction<sup>24,28</sup>, in which SRB might utilize sulfate-to-ZVS as an alternative  
80 pathway to sulfate-to-sulfide to alleviate the inhibitive effects of sulfide. This  
81 proposal was also needed to be further verified given that the canonical pathway of  
82 the dissimilatory sulfate reduction mediated by SRB reduces sulfate to sulfide without  
83 the production of ZVS<sup>29,30</sup>. Till to date, the pure culture of SRB has not been isolated  
84 from both AOM enrichment cultures and the methanogenic bioreactor as mentioned  
85 above<sup>25,28</sup>, which hindering the researchers to test whether SRB could directly drive  
86 ZVS formation via dissimilatory sulfate reduction or some other unknown pathways.

87 The typical dissimilatory sulfate reduction system contains a combination of  
88 sulfate adenylyltransferase (Sat) and adenylyl-sulfate reductase (AprAB) initiating the

89 reduction of sulfate to sulfite, and then sulfite reductases catalyzing the reduction of  
90 sulfite to sulfide<sup>31</sup>. On the other hand, sulfide could also be produced by thiosulfate  
91 disproportionation process in SRB<sup>32</sup>. Potentially, SRB might form ZVS or even  
92 elemental sulfur from sulfide driven by SQR or other proteins with similar functions.  
93 However, to our best knowledge, there is no evidence that pure isolate of SRB could  
94 form ZVS via oxidizing sulfide that generated by dissimilatory sulfate reduction or  
95 thiosulfate disproportionation.

96 In the present study, a strictly anaerobic strain of *Desulfovibrio marinus* CS1 was  
97 isolated from the surface sediments of a cold seep in the South China Sea, and it was  
98 surprisingly found to form ZVS in the presence of thiosulfate. In combination with  
99 genomic, proteomic and biochemical approaches, PhsA and SQR were demonstrated  
100 to be responsible for the formation of ZVS in strain CS1, which is a novel pathway  
101 driving ZVS formation present in SRB. Based on the metagenomics analysis, the  
102 broad distribution of this novel pathway and its potential contribution to the deep-sea  
103 sulfur cycle were also investigated and discussed.

## 104 **Results**

### 105 **Cultivation and identification of a typical sulfate reducing bacterium**

106 ***Desulfovibrio marinus* CS1 from the deep-sea cold seep.** Despite a high proportion  
107 of SRB has been reported in deep-sea cold seeps<sup>33-36</sup>, the lack of cultured  
108 representatives from deep sea has hampered a more detailed exploration of this  
109 important group. With this, we anaerobically enriched the surface sediment samples  
110 collected from the deep-sea cold seep with a modified sulfate reducing medium (SRM)

111 at 28 °C for one month, enriched samples were then plated on the solid SRM in  
112 Hungate tubes. Given the presence of Fe<sup>2+</sup> in the medium, typical SRB would form  
113 black FeS precipitation. As expected, the enrichment formed a large amount of black  
114 color colonies in the solid SRM, indicating the dominant presence of SRB in the  
115 enrichment. Single colonies with black color were subsequently purified several times  
116 using the dilution-to-extinction technique at 28 °C under a strict anaerobic condition.  
117 Surprisingly, based on the 16S rRNA gene sequencing, these colonies belong to a  
118 same SRB strain designated CS1. The 16S rRNA gene sequence of strain CS1 shared  
119 a high similarity of 99.54% with *Desulfovibrio marinus* E-2<sup>T</sup> (accession no.  
120 NR\_043757.1). Additionally, strain CS1 also clustered with *D. marinus* E-2<sup>T</sup>  
121 according to the phylogenetic analysis (Supplementary Fig. 1a). The ANI and AAI  
122 analyses of genomes between strain CS1 and another strain *D. marinus* P48SEP  
123 (accession no. ASM762508) were respective 98.95% and 99.87% (Supplementary Figs.  
124 1b and 1c), which were higher than the accepted threshold (both ANI and AAI value  
125 above 95%) for same species<sup>37,38</sup>. Thus, strain CS1 was identified as a member of *D.*  
126 *marinus* and designated *D. marinus* CS1 in this study. Accordingly, *D. marinus* CS1  
127 showed black color in the agar plate containing Fe<sup>2+</sup> (Supplementary Fig. 2a). Under  
128 transmission and scanning electron microscopy observation, the cells of strain CS1  
129 were short rod-like, approximately 2 μm × 0.5 μm in size, and had a single flagellum  
130 (Supplementary Figs. 2b and 2c).

131 **Diverse sulfur metabolic pathways existing in *D. marinus* CS1.** To obtain a deeper  
132 insight into the characterization of *D. marinus* CS1, the genome of *D. marinus* CS1

133 was completely sequenced (Supplementary Table 1). When analyzing the genome  
134 sequence of strain CS1, we found a complete dissimilatory sulfate reduction pathway  
135 and a partial assimilatory sulfate reduction pathway present in *D. marinus* CS1  
136 (Supplementary Fig. 2d, Supplementary Table 2). For dissimilatory sulfate reduction  
137 pathway, two conserved gene clusters responsible for transforming sulfate to sulfite  
138 and sulfite to sulfide (Supplementary Fig. 2e), were identified in *D. marinus* CS1.  
139 Notably, a homologous gene encoding SQR that usually involved in sulfide oxidation  
140 was surprised to be identified in the genome of *D. marinus* CS1 (Supplementary Fig.  
141 2d and Supplementary Table 2). Given the presence of SQR-like protein and its usual  
142 sulfur oxidation activity, we speculated that some unexplored sulfur oxidation  
143 pathways might exist in strain CS1.

144 **Responses of *D. marinus* CS1 to different sulfur sources.** Considering the presence  
145 of diverse sulfur metabolic pathways in *D. marinus* CS1, we sought to explore the  
146 responses of strain CS1 to different sulfur containing compounds including sulfate,  
147 sulfite, thiosulfate and sulfide. First, we monitored the growth dynamics of strain CS1  
148 that cultured in SRM medium supplemented with above sulfur sources for up to two  
149 months. Surprisingly, the supplement of different sulfur sources showed a similar or  
150 even better growth status compared to the control group when cultured strain CS1 for  
151 up to two months, though some of them inhibited bacterial growth at the beginning of  
152 the incubation period (Fig. 1a). Especially, the supplement of 40 mM  $\text{Na}_2\text{S}_2\text{O}_3$  or 10  
153 mM  $\text{Na}_2\text{SO}_3$  in the medium could significantly promote the growth of strain CS1  
154 when the cells entered the stationary phase (Fig. 1a). Therefore, strain CS1 showed

155 different responses to different sulfur sources. On the other hand, cells of strain CS1  
156 showed an extended morphology under the treatment of Na<sub>2</sub>S<sub>2</sub>O<sub>3</sub> (Fig. 1d), Na<sub>2</sub>SO<sub>3</sub>  
157 (Fig. 1e) and Na<sub>2</sub>S (Fig. 1f) compared to that in the control group (Fig. 1a) or  
158 supplement of Na<sub>2</sub>SO<sub>4</sub> (Fig. 1b).

159 To understand the underlying mechanisms of strain CS1 responding to different  
160 sulfur sources, we conducted a proteomic analysis of strain CS1 that cultured in the  
161 medium supplemented with Na<sub>2</sub>S<sub>2</sub>O<sub>3</sub>, Na<sub>2</sub>SO<sub>3</sub> and Na<sub>2</sub>S, respectively. Since the  
162 growth status of *D. marinus* CS1 in different sulfur sources was inconsistent, we  
163 collected bacterial cells for proteome analysis when the OD<sub>600</sub> value was about  
164 0.08~0.1 for both experimental and control groups. The proteomic results showed that  
165 compared to the control group total 1070, 1255 and 1012 proteins were significantly  
166 differentially expressed in the experimental groups containing Na<sub>2</sub>S<sub>2</sub>O<sub>3</sub>, Na<sub>2</sub>SO<sub>3</sub> and  
167 Na<sub>2</sub>S ( $P < 0.05$ ), respectively. Notably, most key enzymes associated with  
168 dissimilatory sulfate reduction (such as QmoA, QmoB, QmoC, AprA, AprB, Sat,  
169 DsrA and DsrB) were evidently down-regulated when cultured strain CS1 in the  
170 medium supplemented with Na<sub>2</sub>S<sub>2</sub>O<sub>3</sub> (Fig. 1g), Na<sub>2</sub>SO<sub>3</sub> (Fig. 1h) and Na<sub>2</sub>S (Fig. 1i),  
171 indicating that the supplement of Na<sub>2</sub>S<sub>2</sub>O<sub>3</sub>, Na<sub>2</sub>SO<sub>3</sub> and Na<sub>2</sub>S suppressed the process  
172 of dissimilatory sulfate reduction in strain CS1. In contrast, the expressions of  
173 proteins related to thiosulfate and sulfide metabolisms, such as PhsA (thiosulfate  
174 reduction), MetB and SQR (sulfide oxidation), were significantly up-regulated when  
175 cultured strain CS1 in the medium supplemented with Na<sub>2</sub>S<sub>2</sub>O<sub>3</sub> (Fig. 1g), Na<sub>2</sub>SO<sub>3</sub> (Fig.  
176 1h) and Na<sub>2</sub>S (Fig. 1i).



177 ***D. marinus* CS1 produces ZVS via metabolizing thiosulfate.** It's noting that some  
178 obvious white substances were observed in the medium supplemented with 40 mM  
179  $\text{Na}_2\text{S}_2\text{O}_3$  when cultured *D. marinus* CS1 for about 20 days (Fig. 2a). In our previous  
180 study, we found a deep-sea bacterium *Erythrobacter flavus* 21-3 that isolated from the  
181 same sampling site of strain CS1 could oxidize  $\text{Na}_2\text{S}_2\text{O}_3$  to form ZVS through a novel  
182 sulfur oxidation pathway<sup>17</sup>. To clarify whether these white substances produced by  
183 strain CS1 were also ZVS, the SEM and EDS assays were conducted for initial  
184 assessment. SEM results showed that the white substances formed regular crystals (Fig.  
185 2b), which were further identified as elemental sulfur by EDS (Fig. 2c). On the other  
186 hand, Raman spectrum showed that three strong peaks at 154, 221 and 475  $\text{cm}^{-1}$  were  
187 identified toward the white substances produced by *D. marinus* CS1 (Fig. 2d).  
188 According to the cyclooctasulfur standard, these peaks corresponded to the bending  
189 and stretching modes of the 8-fold ring, and belonged to the typical characteristics of  
190  $\text{S}_8$  (Fig. 2e)<sup>6,8,17</sup>. Meanwhile, the formation of ZVS mediated by strain CS1 was  
191 tracked across the whole two-month incubation period in the medium supplemented  
192 with thiosulfate. The results showed that ZVS could be detected after three-week  
193 incubation and its amount reached a stationary phase after five-week incubation (Fig.  
194 3a), which presented a similar pattern with the growth curve of strain CS1 grown in  
195 the medium supplemented with thiosulfate (Fig. 1a). Accordingly, the concentration  
196 of thiosulfate decreased along with the formation of ZVS, while the concentration of  
197 sulfate almost remained unchanged (Fig. 3a). In comparison, strain CS1 could not  
198 form any ZVS in the medium absent of extra thiosulfate (Fig. 3b), while the

199 concentration of sulfate decreased along with the bacterial growth (Fig. 3b). All the  
200 above results indicated that strain CS1 drove the formation of ZVS via metabolizing  
201 thiosulfate.

202 **PhsA and SQR play key roles in driving ZVS formation in *D. marinus* CS1.** Next,  
203 we sought to ask what determines the formation of ZVS in strain CS1 in the presence  
204 of thiosulfate. Given PhsA and SQR existing in strain CS1 and their evident  
205 expression up-regulation in the conditions supplemented with different sulfur sources  
206 (Figs. 1g-i), we thus speculate whether PhsA might metabolize thiosulfate to sulfide  
207 which in turn is oxidized to ZVS by SQR. To verify this assumption, we analyzed the  
208 dynamics of the expression levels of *phsA* and *sqr* along with the formation of ZVS as  
209 shown in Figure 4A. The results showed the expression level of *phsA* presented a  
210 decreasing trend from the beginning to the end of the incubation period though it was  
211 significantly up-regulated when compared to the control (Fig. 3c). On the other hand,  
212 the expression level of *sqr* was only markedly up-regulated after three-week  
213 incubation when compared to the control and then presented a decreasing trend till the  
214 end of the incubation period (Fig. 3d), which showed a similar pattern of ZVS  
215 formation as shown in Figure 4A. Indeed, the above results were consistent well with  
216 our speculation that PhsA and SQR respectively catalyze thiosulfate to form sulfide  
217 and then ZVS.

218       Given the absence of genetic operation system of strain CS1, we further verified  
219 the above functions of PhsA and SQR in *Escherichia coli*. First, we respectively  
220 overexpressed *phsA* (E8L03\_06385) and *sqr* (E8L03\_05425) of *D. marinus* CS1 in *E.*

---

221 *coli* BL21(DE3) cells (Supplementary Fig. 3). PhsA has been proven to catalyze the  
222 decomposition of thiosulfate into sulfite and H<sub>2</sub>S<sup>39-41</sup>. Accordingly, the overexpression  
223 of PhsA in *E. coli* significantly promoted the production of H<sub>2</sub>S (Fig. 4a), indicating  
224 that PhsA of strain CS1 indeed functioned as an enzyme that catalyzing thiosulfate to  
225 H<sub>2</sub>S. On the other hand, SQR has potentials to oxidize sulfide to ZVS as shown in  
226 Figure 1D. As expected, the overexpression of SQR could efficiently remove the H<sub>2</sub>S  
227 produced by *E. coli* when cultured in the medium supplemented with 40 mM Na<sub>2</sub>S<sub>2</sub>O<sub>3</sub>  
228 (Fig. 4b), which benefits the bacterial cells to alleviate the toxin effects of H<sub>2</sub>S. We  
229 thus further analyzed the activity of sulfide oxidation mediated by SQR in *E. coli*  
230 BL21(DE3) that cultured in the medium supplemented with different concentrations  
231 of Na<sub>2</sub>S (5 mM, 10 mM, 20 mM, 30 mM and 40 mM). If SQR could convert sulfide  
232 to ZVS, the toxicity of sulfide to *E. coli* cells would be significantly weakened.  
233 Indeed, the overexpression of SQR in *E. coli* BL21(DE3) could significantly promote  
234 ( $P < 0.01$ ) bacterial growth when compared with the control group regardless of the  
235 concentrations of Na<sub>2</sub>S supplemented in the medium (Fig. 4c). Therefore, we propose  
236 that PhsA and SQR might drive ZVS formation in strain CS1 via respectively  
237 catalyzing thiosulfate and sulfide.

238 As SQR is a key enzyme catalyzing sulfide to form ZVS, we further analyzed  
239 SQR homologs identified in different microbes. In total, six types (Type I to Type VI)  
240 have been identified in bacteria, archaea and eukaryotes<sup>19</sup>. Based on the phylogenetic  
241 analysis, SQR in *D. marinus* CS1 was clustered into the branch of Type III SQRs with  
242 two conserved amino acid residues at Cys159 and Cys331 (Supplementary Fig. 4).

243 Homologous sequences of SQR in strain CS1 were also identified in other SRB-D  
244 species that including *Desulfovibrio indonesiensis*, *Desulfohalovibrio alkalitolerans*,  
245 *Desulfatirhabdium butyrativorans*, *Desulfospira joergensenii*, *Pseudodesulfovibrio* sp.  
246 SRB007 and *Pseudodesulfovibrio* sp. zrk46 (Supplementary Fig. 4). It's noting that  
247 *Pseudodesulfovibrio* sp. SRB007 and *Pseudodesulfovibrio* sp. zrk46 are two deep-sea  
248 SRB that isolated from the same sampling site as that of strain CS1.

249 **Proteomic analysis of sulfur metabolism of *D. marinus* CS1 in the deep sea.** As  
250 shown above, *D. marinus* CS1 responded to different sulfur-containing compounds  
251 and formed ZVS in the laboratorial condition. Given that strain CS1 is a typical  
252 deep-sea sulfate reducing bacterium, it is necessary to explore its sulfur metabolisms  
253 in the deep-sea environment to mimic its lifestyle in the isolation niches. Taking the  
254 advantage of a cruise in May 2020, we cultured strain CS1 in the deep-sea cold seep  
255 for 10 days (Fig. 5a). Based on the environmental parameters of sites of *in situ* test  
256 and strain CS1 isolation (Supplementary Table S3), the two sites possessed pretty  
257 similar conditions. After 10 days incubation, bacterial cells in different groups were  
258 collected and performed proteomic assays after verification of their purity. As  
259 expected, according to the proteome data, the expressions of most key proteins  
260 associated with sulfate reduction (both assimilatory and dissimilatory) in the “In situ”  
261 group were significantly up-regulated compared to those in the laboratorial condition  
262 (Fig. 5b), strongly indicating the dominant function of sulfate reduction for strain CS1  
263 to thrive in the deep-sea environment. Surprisingly, the expression of SQR was most  
264 up-regulated in the “In situ” group when compared to that cultivated in the

265 laboratorial condition (Fig. 5b). Given that SQR was also significantly up-regulated  
266 when stimulating strain CS1 with thiosulfate (Fig. 3d) and sulfite (Fig. 1h) in  
267 laboratorial conditions and broadly distributed in different bacteria (Supplementary  
268 Figs. 4 and 5), we propose that SQR might play an essential role in driving sulfide  
269 oxidation in strain CS1 and other microbes. Meanwhile, the expression of PhsA was  
270 also evidently up-regulated in the “In situ” group (Fig. 5b), indicating thiosulfate  
271 metabolization is a major metabolic pathway for strain CS1 in the deep-sea  
272 environment. Given the fact that the expressions of SQR and PhsA were  
273 simultaneously up-regulated, we prefer the proposal that strain CS1 could form ZVS  
274 in the deep-sea environment.

275 Overall, based on our present results, a proposed model towards central sulfur  
276 metabolisms of *D. marinus* CS1 was constructed (Fig. 6). First, sulfate is transported  
277 into the cells and then reduced to sulfite through both dissimilatory and assimilatory  
278 reduction pathways. Thereafter, sulfite is further reduced to sulfide mediated by the  
279 DSR complex via a typical sulfite dissimilatory reduction pathway. Meanwhile,  
280 thiosulfate is reduced to sulfide by PhsA. Finally, part of the generated sulfide is used  
281 for amino acids (e.g. cysteine and methionine) synthesis, and the rest is oxidized to  
282 polysulfide or even ZVS by SQR. The formed ZVS is finally exported to the outside  
283 of cells, contributing to form the mass ZVS around cold seep that observed in our  
284 previous reports<sup>6,17</sup>.

285 **SRB potentially contribute to the formation of ZVS in deep sea.** Based on our  
286 above results, *D. marinus* CS1 was demonstrated to form ZVS in the laboratorial

287 conditions and possible deep-sea environment. We next sought to clarify the  
288 abundance of SRB in the deep-sea cold seep and their potentials for the formation of  
289 ZVS. As SRB belong to *D*-proteobacteria (SRB-D), the abundance of SRB-D was  
290 thus investigated by using the operational taxonomic units (OTUs) method with the  
291 sample collected from the surface (0-20 cm) of sediments. The results showed that the  
292 ration of SRB-D to the whole bacterial community was about 10% (Supplementary  
293 Fig. 6a). Among them, orders Desulfuromonadales and Desulfobacterales respectively  
294 accounted for 70% and 20%, while order Desulfovibrionales only accounted for less  
295 than 10% (Supplementary Fig. 6a). To obtain deeper insights into the distribution of  
296 genes associated with sulfur metabolisms in SRB-D, metagenomic sequencing was  
297 performed with samples collected from different depth intervals from the sedimental  
298 surface. As expected, genes associated SRB-D had a very high abundance in the cold  
299 seep sediments, whose percentages respectively accounted for 10.38%, 16.88%,  
300 21.10%, 10.75% and 5.62% of the whole bacterial community in the samples C1, C4,  
301 C2, C3 and C5 (Supplementary Fig. 6b). After careful annotation and analyses of  
302 genes obtained from the metagenomic sequencing, we found that key genes  
303 responsible for both sulfate dissimilatory and assimilatory reduction pathways broadly  
304 distributed in the metagenomes of SRB-D and other bacteria in different samples  
305 (Supplementary Fig. 6c). And genes *sqr* and *phsA* could be identified in different  
306 samples with relative high proportions, strongly indicating the SRB-D in different  
307 depths of sediments have potentials to form ZVS.

308

309 **Discussion**

310 Zero-valent sulfur (ZVS), in the form of elemental sulfur and dissolved polysulfide  
311 sulfur, is commonly measured in the highly reducing, sulfidic environments that  
312 characterize AOM ecosystems including the cold seeps<sup>25</sup>. SRB, a kind of important  
313 population inhabiting in cold seeps, have a pivotal role in the sulfur cycle, from which  
314 the generation of ZVS represents a novel pathway<sup>24,28</sup>. ZVS generation from SRB was  
315 proposed to be mediated by the dissimilatory sulfate reduction under unfavorable  
316 conditions, e.g., inhibitive high-concentrations of sulfide<sup>24,28</sup>. Hence, sulfide is a key  
317 intermediate for SRB to produce ZVS. It is noting that sulfide could be generated  
318 from thiosulfate via a reduction process catalyzed by PhsA, a kind of thiosulfate  
319 reductase (Supplementary Fig. 2d). Therefore, it is possible that SRB could also  
320 generate ZVS from thiosulfate in addition to sulfate. However, till to date, there is no  
321 any study showing the process and mechanisms of ZVS production from thiosulfate  
322 mediated by SRB. In the present study, we report for the first time that *D. marinus*  
323 CS1, a typical deep-sea sulfate reducing bacterium, could generate ZVS from  
324 thiosulfate coordinately mediated by PhsA and SQR. In this process, PhsA catalyzes  
325 thiosulfate to form sulfide, which is then oxidized by SQR to form ZVS.

326 Thiosulfate has been mentioned as an important shunt in marine environment for  
327 coupling of reductive and oxidative pathways of the sulfur cycle<sup>32</sup>. And the reduction  
328 of thiosulfate is a crucial process for anaerobic energy metabolism of SRB in marine  
329 sediments<sup>42,43</sup>. In surface marine sediments (0~10 cm depth), totally 15%~50% of  
330 thiosulfate is reduced by sulfate reducing microorganisms, and approximately

331 30%~60% of sulfide is produced during this process<sup>32</sup>. PhsA or its homologs are  
332 crucial for catalyzing thiosulfate to sulfide, which greatly contributes to an  
333 intraspecies sulfur cycle that drives S<sub>0</sub> respiration in different bacteria<sup>39,44</sup>. For *D.*  
334 *marinus* CS1, *phsA* was identified in its genome and was proposed to encode PhsA  
335 protein to reduce thiosulfate to sulfide (Supplementary Fig. 2d). Indeed, its expression  
336 level was significantly up-regulated in the medium supplemented with different sulfur  
337 sources in the laboratorial (Figs. 1g-1i) and deep-sea *in situ* (Fig. 5b) conditions,  
338 strongly indicating it is essential for sulfur cycling of *D. marinus* CS1. Especially, its  
339 expression was evidently up-regulated across the whole two-month incubation period  
340 in the presence of thiosulfate (Fig. 3c) and it was believed to play an indispensable  
341 role for strain CS1 to reduce thiosulfate to generate sulfide. Consistently, its mediation  
342 of thiosulfate to sulfide was verified in *E. coli* cells with the overexpression system  
343 (Fig. 4a).

344 As we known, sulfide is a highly toxic compound for microorganisms and  
345 eukaryotes<sup>45,46</sup>. However, on the other hand, sulfide is also a very common  
346 intermediate of sulfur cycle in most microorganisms, and microbes have evolved  
347 different strategies to transform it to other forms given its strong toxicity. Indeed, the  
348 addition of Na<sub>2</sub>S significantly slowed down the growth of strain CS1 and it took a  
349 very long time and much energy for the bacterial cells to remove the toxicity effects  
350 of sulfide (Fig. 1a). SQR, a kind of oxidoreductase, enables to oxidize sulfide to ZVS  
351 and has potentials to alleviate the toxicity of sulfide<sup>19</sup>. Accordingly, we identified a  
352 gene encoding SQR in the genome of strain CS1 (Supplementary Fig. 2d). Notably,



353 the expression dynamics of SQR showed a very similar pattern to the formation of  
354 ZVS when cultured strain CS1 in the medium supplemented with thiosulfate (Figs. 3a  
355 and 3d), indicating SQR is closely related to the formation of ZVS from thiosulfate in  
356 strain CS1. Based on the function of SQR, we believe that SQR identified in strain  
357 CS1 is capable of oxidize sulfide to ZVS for toxicity removal, which was confirmed  
358 by the effects of SQR overexpressed in *E. coli* BL21(DE3) to reduce the toxicity of  
359 Na<sub>2</sub>S from 5 mM to 40 mM (Fig. 4). It is noting that another member of *Desulfovibrio*  
360 genus (*D. piger* Vib-7) could not grow in the medium containing 6 mM or higher  
361 concentration of sulfide<sup>47</sup>, while strain CS1 could tolerate up to 10 mM sulfide (Fig.  
362 1a). Interestingly, the homologous sequence of SQR in strain CS1 was absent in the  
363 genome of *D. piger* (LT630450.1). Therefore, it is reasonable to deduce that SQR is  
364 an essential protein to drive sulfide oxidation to ZVS and thereby increasing the  
365 tolerance of *D. marinus* CS1 to sulfide.

366 Notably, in the deep-sea *in situ* environment, the expressions of both PhsA and  
367 SQR were markedly up-regulated (Fig. 5b). Due to the time limitation of our cruise,  
368 we were unable to culture *D. marinus* CS1 for a longer time (e.g. up to 60 days or  
369 longer) to observe the formation of ZVS. However, based on the fact that both  
370 expressions of PhsA and SQR were significantly up-regulated, we firmly believe that  
371 strain CS1 should form ZVS in the deep-sea cold seep. Through the metagenomic  
372 analysis, we found homologues of SQR of strain CS1 also broadly distributed in other  
373 SRB species and bacteria inhabiting in the same cold seep environment of the South  
374 China Sea (Supplementary Fig. 5, Supplementary Dataset 1). Moreover, homologs of

375 key proteins (including PhsA and SQR) involved in sulfur cycle in *D. marinus* CS1  
376 were found to widely exist in the metagenomes of SRB and other bacteria that living  
377 in the sediments of the South China Sea (Supplementary Fig. 6c). Therefore, we  
378 propose that the novel ZVS formation pathway from thiosulfate metabolism  
379 mediated by PhsA and SQR is used by a lot of SRB or even other bacteria in the  
380 deep-sea environments, which might play an undocumented role in the sulfur cycle  
381 and encourages the re-evaluation of the contribution of SRB to the formation of ZVS  
382 in the deep ocean.

## 383 **Methods**

384 **Isolation and cultivation of *D. marinus* CS1.** To isolate SRB from the deep-sea  
385 environment, cold seep sediment samples were collected by R/V *KEXUE* in the South  
386 China Sea (119°17'04.956"E, 22°06'58.384"N) at a depth of approximately 1,143 m in  
387 September 2017 (Supplementary Table S3). The samples were cultured by using the  
388 modified sulfate reducing medium (SRM) that containing 6.5 g PIPES (C<sub>8</sub>H<sub>18</sub>N<sub>2</sub>O<sub>6</sub>S<sub>2</sub>),  
389 2.7 g MgSO<sub>4</sub>·7H<sub>2</sub>O, 4.3 g MgCl<sub>2</sub>·6H<sub>2</sub>O, 0.25 g NH<sub>4</sub>Cl, 0.5 g KCl, 0.14 g CaCl<sub>2</sub>, 0.14 g  
390 K<sub>2</sub>HPO<sub>4</sub>·3H<sub>2</sub>O, 0.01 g Fe(NH<sub>4</sub>)<sub>2</sub>(SO<sub>4</sub>)<sub>2</sub>·6H<sub>2</sub>O, 0.1 g CH<sub>3</sub>COONa, 2.24 g  
391 CH<sub>3</sub>CHOHCOONa, 20 mM absolute ethanol, 1 mL trace elements solution  
392 (Supplementary Table S4), 1 mL vitamins solution (Supplementary Table S5), 0.5 g  
393 cystine and 0.001 g resazurin in 1 liter filtered sea water, and 15 g/L agar was added to  
394 prepare the corresponding solid medium. After a month anaerobic enrichment at  
395 standard atmospheric pressure, a 50 µL culture was spread on the solid SRM medium  
396 prepared in the Hungate tubes, which were further anaerobically incubated at 28 °C

397 for 7 days. Individual colonies were picked respectively by sterilized bamboo sticks  
398 and then cultured in the SRM broth. Strain CS1 was isolated and purified by the  
399 Hungate roll-tube method for several rounds until considered to be axenic. Genomic  
400 DNA extraction and PCR amplification of the 16S rRNA gene sequence of strain CS1  
401 were performed as previously described previously<sup>17</sup>.

402 **Electron microscopic analysis.** The morphological characteristics of *D. marinus* CS1  
403 were observed by scanning electron microscope (SEM) (S-3400N; Hitachi, Japan)  
404 and transmission electron microscope (TEM) (HT7700; Hitachi, Japan). The ZVS  
405 produced by strain CS1 in the medium supplemented with Na<sub>2</sub>S<sub>2</sub>O<sub>3</sub> was identified via  
406 Energy-Dispersive Spectrum (EDS) (model 550i, IXRF systems, USA) equipment  
407 with SEM and Raman spectra confocal microscope (WITec alpha300 R system;  
408 WITec Company, Germany), respectively, as described in our previous study<sup>17</sup>. After  
409 incubated in the medium supplemented with 40 mM Na<sub>2</sub>S<sub>2</sub>O<sub>3</sub> for 30 days, the milky  
410 white supernatant in strain CS1 medium was collected by centrifugation (5,000 g, 10  
411 min) and lyophilized, then the pellet was used for EDS analysis at an accelerating  
412 voltage of 5 keV for 30 s and Raman spectra.

413 **Genome sequencing and annotation.** Genomic DNA was extracted from *D. marinus*  
414 CS1 that cultured for 7 days at 28 °C. The harvested DNA was detected by the  
415 agarose gel electrophoresis and quantified by Qubit 3.0 (Thermo Fisher Scientific,  
416 USA). Whole-genome sequence determinations of strain CS1 were carried out with  
417 the PacBio (Pacific Biosciences, USA) and Illumina MiSeq (Illumina, USA)  
418 sequencing platform. The genome of strain CS1 was sequenced by PacBio platform

419 (PacBio, USA) using single molecule real-time (SMRT) technology. Sequencing was  
420 performed at the Beijing Novogene Bioinformatics Technology Co., Ltd. The low  
421 quality reads were filtered by the SMRT Link v5.0.1 and the filtered reads were  
422 assembled to generate one contig without gaps and was manually circularized by  
423 deleting an overlapping end.

424 The genome relatedness values were calculated by Average Nucleotide Identity  
425 (ANI) based on BLASTN algorithm with recommended species criterion cut-offs 95%  
426 (JSpecies WS, <http://jspecies.ribohost.com/jspeciesws/>) and the amino acid identity  
427 (AAI) based on AAI-profiler with values above 95~97 % correspond to the same  
428 species (<http://ekhidna2.biocenter.helsinki.fi/AAI/>). To determine the phylogenetic  
429 position of *D. marinus* CS1, the 16S rRNA gene sequence was analyzed by the BLAST  
430 programs (<https://blast.ncbi.nlm.nih.gov/Blast.cgi>), and the phylogenetic tree was  
431 reconstructed with MEGA X<sup>48</sup>.

432 **Growth assays of *D. marinus* CS1 in the medium supplemented with different**  
433 **sulfur sources.** Growth assays were performed under the standard atmospheric  
434 pressure. Briefly, 15 mL fresh *D. marinus* CS1 was cultured in SRM supplemented  
435 with or without 20 mM Na<sub>2</sub>SO<sub>4</sub>, 40 mM Na<sub>2</sub>S<sub>2</sub>O<sub>3</sub>, 10 mM Na<sub>2</sub>SO<sub>3</sub> and 10 mM Na<sub>2</sub>S  
436 for two months at 28 °C in 2 L anaerobic bottles, respectively. Each condition had  
437 three replicates. Bacterial growth status was monitored by measuring the absorbance  
438 value at 600 nm (OD<sub>600</sub>). For the morphological observation, cells of strain CS1 with  
439 OD<sub>600</sub> values at 0.08~0.1 were collected and recorded under the TEM as described  
440 above.

441 **Proteomic analysis.** Proteome analysis was performed by PTM BIO (PTM Biolabs  
442 Inc., China). Briefly, cell suspensions of *D. marinus* CS1 with an OD<sub>600</sub> value of  
443 0.08~0.1 were collected from different groups at different time points: 7 days for  
444 control group and Na<sub>2</sub>SO<sub>4</sub> supplement group, 14 days for Na<sub>2</sub>S<sub>2</sub>O<sub>3</sub> supplement group  
445 and Na<sub>2</sub>S supplement group, and 42 days for Na<sub>2</sub>SO<sub>3</sub> supplement group, respectively.  
446 Thereafter, the cells were checked by 16S rRNA sequencing to confirm the purity of  
447 the culture and performed further proteomic analysis. For proteome analyses, the cells  
448 of strain CS1 were washed with 10 mM phosphate buffer solution (PBS pH 7.4),  
449 resuspended in lysis buffer (8 M urea, 1% Protease Inhibitor Cocktail) and disrupted by  
450 sonication. The remaining debris was removed by centrifugation at 12,000 g at 4 °C for  
451 10 min. Finally, the supernatant was collected and the protein concentration was  
452 determined with a BCA protein assay kit (Thermo Fisher Scientific, USA) according  
453 to the manufacturer's instructions. Trypsin digestion, TMT labeling, HPLC  
454 fractionation, LC-MS/MS analysis, database search and bioinformatics analysis are  
455 detailedly described in the supplementary information. Analysis of the differentially  
456 expressed proteins was performed using HemI software<sup>49</sup>.

457 To perform the proteomic analysis with the cells that cultured in the deep-sea  
458 cold seep, strain CS1 was firstly cultured in SRM for 7 days under laboratorial  
459 conditions, and then was separated into two parts: one was equally divided into three  
460 dialysis bags (8,000-14,000 Da cutoff, which allowing the exchanges of substances  
461 smaller than 8,000 Da but preventing bacterial cells from entering or leaving the bag;  
462 Solarbio, China) as the "In situ" group; the other part was equally divided into three

---

463 anaerobic bottles and incubated for 10 days in the laboratorial conditions as the  
464 control group. The “In situ” group was placed simultaneously in the cold seep  
465 (E119°17'04.429", N22°07'01.523") for 10 days in the June 2020 during the cruise of  
466 R/V *KEXUE*. After 10 days incubation in the deep sea, the bags were taken out and  
467 the cells were immediately collected and saved in the -80 °C freezer. 16S rRNA  
468 sequencing was performed to ensure the purity of cells of strain CS1 that collected  
469 from the *in situ* cultivation. The proteomic assays were performed as described above.

470 **Analytical techniques for the determination of different sulfur compounds and**  
471 **quantitative real-time PCR (qRT-PCR) assay.** To detect the changes of  
472 concentrations of thiosulfate and sulfate, 50 mL cultures of *D. marinus* CS1 was  
473 collected from groups supplemented with or without 40 mM Na<sub>2</sub>S<sub>2</sub>O<sub>3</sub> at the 7<sup>th</sup>, 14<sup>th</sup>,  
474 21<sup>st</sup>, 28<sup>th</sup>, 35<sup>th</sup> and 61<sup>st</sup> day, respectively. Meanwhile, the growth status was monitored.  
475 After centrifugation at 12,000 g at 4 °C for 30 min, concentrations of thiosulfate and  
476 sulfate in the supernatant were respectively measured by iodometric and barium  
477 sulfate turbidimetry as described previously<sup>50,51</sup>. The concentration of ZVS (S<sub>8</sub>) in the  
478 medium was detected according to the method described previously<sup>52</sup>. Briefly, 1 mL  
479 cultured medium was extracted three times using a total of 5 mL chloroform. The  
480 extracted sample was measured on a UV-Vis spectrometer (Infinite M1000 Pro; Tecan,  
481 Männedorf, Switzerland) at 270 nm<sup>52</sup>.

482 To perform the qRT-PCR assay, total RNAs of cells collected at different time  
483 points were extracted with TRIzol reagent (Invitrogen, USA). First-strand cDNA  
484 synthesis was carried out with ReverTra Ace® qPCR RT Master Mix (TOYOBO,

---

485 Japan) based on the manufacturer's instructions. The expression levels of *sqr* and  
486 *phsA* were determined using qRT-PCR on different cDNA samples obtained from  
487 cultures as described above. Specific primers were designed according to the  
488 corresponding sequences in the genome of *D. marinus* CS1 (Supplementary Table S6).  
489 The comparative threshold cycle (CT) ( $2^{-\Delta\Delta CT}$ ) method was used to analyze the  
490 expression level<sup>53</sup>. Two 16S rRNA gene primers for *D. marinus* CS1 (Supplementary  
491 Table S6) were used as internal controls to verify successful transcription and to  
492 calibrate the cDNA template for corresponding samples. qRT-PCR was performed  
493 using a Quant Studio<sup>TM</sup> 6 Flex (Life Technologies, USA), and the collected data were  
494 analyzed with the system's accompanying SDS software. Dissociation curve analysis  
495 of amplification products was performed at the end of each PCR to confirm that only  
496 one PCR product was amplified and detected. All data were given in terms of relative  
497 mRNA expressed as means  $\pm$  standard error (N=4).

498 **Functional assays of PhsA and SQR of *D. marinus* CS1.** To detect the functions of  
499 SQR and PhsA that identified in *D. marinus* CS1, the genes encoding these two  
500 proteins were respectively cloned and overexpressed in *E. coli*. First, the open reading  
501 frame of *sqr* or *phsA* was amplified from the *D. marinus* CS1 genome using the KOD  
502 One<sup>TM</sup> PCR Master Mix (TOYOBO, Japan) with corresponding primers  
503 (Supplementary Table S6). The PCR product was purified by using a DNA Gel  
504 Extraction Kit (TsingKe, China), and then was cloned in the plasmid pMD19-T  
505 simple (TAKARA, Japan). The DNA fragment was digested with *EcoRI/XhoI* and  
506 *BamHI/EcoRI* (Thermo Fisher Scientific, USA), respectively, and ligated into the

507 same restriction enzymes sites of expression vector pET28a (+) (Merck, Germany).  
508 The recombinant plasmids were transformed into competent cell *E. coli* BL21(DE3)  
509 (TsingKe, China), and transformants were incubated in Luria-Bertani broth (10 g NaCl,  
510 10 g tryptone and 5 g yeast extract per liter of Milli-Q water) supplemented with 50  
511  $\mu\text{g}/\text{mL}$  kanamycin at 37 °C. Protein expression was induced at an  $\text{OD}_{600}$  around 0.6  
512 with 0.1 mM isopropyl-1-thio- $\beta$ -D-galactopyranoside (IPTG), and the cells were  
513 cultured for further 20 h at 16 °C. The resultant proteins were separated by  
514 SDS-PAGE, and visualized with Coomassie Bright Blue R250 staining.

515 Different concentrations of  $\text{Na}_2\text{S}$  (5 mM, 10 mM, 20 mM, 30 mM and 40 mM)  
516 was respectively added in LB medium inoculated with *E. coli* BL21(DE3) containing  
517 the recombinant plasmid *sqr*/pET28a (+). The *E. coli* BL21(DE3) cells transformed  
518 with plasmid pET28a (+) were used as the negative control. After induced with 0.1  
519 mM IPTG, *E. coli* BL21(DE3) cells overexpressing with or without recombinant SQR  
520 (rSQR) were cultured at 37 °C for 24 h. And then the growth statuses of *E. coli*  
521 *sqr*/pET28a (+)/BL21(DE3) (overexpressing rSQR) and the negative control *E. coli*  
522 pET28a (+)/BL21(DE3) that treated with different concentrations of  $\text{Na}_2\text{S}$ , were  
523 measured on the Infinite M1000 Pro UV-Vis spectrometer (Tecan, Switzerland) at 600  
524 nm ( $\text{OD}_{600}$ ). The lead acetate test papers were used to detect the amount of hydrogen  
525 sulfide ( $\text{H}_2\text{S}$ ) which reflecting the capability of PhsA for reducing thiosulfate to  
526 producing  $\text{H}_2\text{S}$ . *E. coli* *sqr*/pET28a (+)/BL21(DE3), *phsA*/pET28a (+)/BL21(DE3)  
527 and the negative control *E. coli* pET28a (+)/BL21(DE3) were cultured in the medium  
528 supplemented with 40 mM  $\text{Na}_2\text{S}_2\text{O}_3$ , respectively. After induced with 0.1 mM IPTG,



529 the production of H<sub>2</sub>S was detected after incubation at 37 °C for 24 h.

530 **Data availability.** The genomic data of *D. marinus* CS1 have been deposited to the  
531 NCBI with the accession number of CP039543.1. The mass spectrometry proteomics  
532 data have been deposited to the Proteome Xchange Consortium via the PRIDE<sup>54</sup>  
533 partner repository with the dataset identifier PXD023247. The raw metagenomic  
534 sequencing data have been deposited to NCBI Short Read Archive (accession  
535 numbers: SRR13052532, SRR13063401, SRR13336710, SRR13065122 and  
536 SRR13065132). The raw amplicon sequencing data have also been deposited to NCBI  
537 Short Read Archive (accession number: SRR13360429).

538 **Statistical analysis.** The significant differences among groups were subjected to  
539 one-way analysis of variance (one-way ANOVA) and multiple comparisons by using  
540 the SPSS 18.0 program. A statistical significance was defined in our study by  $P <$   
541 0.05 (indicated by \* in all figures) or  $P < 0.01$  (indicated by \*\* in all figures).

## 542 **Acknowledgements**

543 This work was funded by the Strategic Priority Research Program of the Chinese  
544 Academy of Sciences (Grant No. XDA22050301), China Ocean Mineral Resources  
545 R&D Association Grant (Grant No. DY135-B2-14), Key Deployment Projects of  
546 Center of Ocean Mega-Science of the Chinese Academy of Sciences (Grant No.  
547 COMS2020Q04), Major Research Plan of the National Natural Science Foundation  
548 (Grant No. 92051107), National Key R and D Program of China (Grant No.  
549 2018YFC0310800), the Taishan Young Scholar Program of Shandong Province

550 (tsqn20161051), and Qingdao Innovation Leadership Program (Grant No. 18-1-2-7-zhc)  
551 for Chaomin Sun. This study is also funded by the CAS Interdisciplinary Innovation  
552 Team (Grant No. JCTD-2018-12) and Open Research Project of National Major  
553 Science & Technology Infrastructure (*RV KEXUE*) (Grant No.  
554 NMSTI-KEXUE2017K01).

### 555 **Author contributions**

556 RL and CS conceived and designed the study; RL conducted most of the experiments;  
557 YS helped to perform the *in situ* experiments; SX and XZ helped to perform the  
558 Raman spectra analysis; RL and CS lead the writing of the manuscript; all authors  
559 contributed to and reviewed the manuscript.

### 560 **Conflict of interest**

561 The authors declare that there are no any competing interests.

### 562 **References:**

- 563 1. Schippers, A. & Jorgensen, B. B. Biogeochemistry of pyrite and iron sulfide oxidation in marine sediments.  
564 *Geochim Cosmochim Acta* **66**, 85-92 (2002).
- 565 2. Holmkvist, L., Ferdelman, T. G. & Jorgensen, B. B. A cryptic sulfur cycle driven by iron in the methane zone  
566 of marine sediment (Aarhus Bay, Denmark). *Geochim Cosmochim Acta* **75**, 3581-3599 (2011).
- 567 3. Wasmund, K., Mussmann, M. & Loy, A. The life sulfuric: microbial ecology of sulfur cycling in marine  
568 sediments. *Env Microbiol Rep* **9**, 323-344 (2017).
- 569 4. White, S. N. Laser Raman spectroscopy as a technique for identification of seafloor hydrothermal and cold  
570 seep minerals. *Chem Geol* **259**, 240-252 (2009).
- 571 5. White, S. N., Dunk, R. M., Peltzer, E. T., Freeman, J. J. & Brewer, P. G. In situ Raman analyses of deep-sea  
572 hydrothermal and cold seep systems (Gorda Ridge and Hydrate Ridge). *Geochem Geophys Geosy* **7** (2006).
- 573 6. Zhang, X. et al. Development of a new deep-sea hybrid Raman insertion probe and its application to the

- 574 geochemistry of hydrothermal vent and cold seep fluids. *Deep-Sea Res Pt I* **123**, 1-12 (2017).
- 575 7. Lichtschlag, A., Kamyshny, A., Ferdelman, T. G. & deBeer, D. Intermediate sulfur oxidation state compounds  
576 in the euxinic surface sediments of the Dvurechenskii mud volcano (Black Sea). *Geochim Cosmochim Acta* **105**,  
577 130-145 (2013).
- 578 8. Berg, J. S., Schwedt, A., Kreutzmann, A. C., Kuypers, M. M. M. & Milucka, J. Polysulfides as intermediates  
579 in the oxidation of sulfide to sulfate by *Beggiatoa* spp. *Appl Environ Microb* **80**, 629-636 (2014).
- 580 9. Gleeson, D. F. et al. Biosignature detection at an arctic analog to Europa. *Astrobiology* **12**, 135-150 (2012).
- 581 10. Hamilton, T. L., Jones, D. S., Schaperdoth, I. & Macalady, J. L. Metagenomic insights into S(0) precipitation  
582 in a terrestrial subsurface lithoautotrophic ecosystem. *Front Microbiol* **5** (2015).
- 583 11. Ghosh, W. & Dam, B. Biochemistry and molecular biology of lithotrophic sulfur oxidation by taxonomically  
584 and ecologically diverse bacteria and archaea. *FEMS Microbiol Rev* **33**, 999-1043 (2009).
- 585 12. Duzs, A. et al. A novel enzyme of type VI sulfide: quinone oxidoreductases in purple sulfur photosynthetic  
586 bacteria. *Appl Microbiol Biot* **102**, 5133-5147 (2018).
- 587 13. Meyer, B., Imhoff, J. F. & Kuever, J. Molecular analysis of the distribution and phylogeny of the soxB gene  
588 among sulfur-oxidizing bacteria - evolution of the Sox sulfur oxidation enzyme system. *Environ Microbiol* **9**,  
589 2957-2977 (2007).
- 590 14. Sakurai, H., Ogawa, T., Shiga, M. & Inoue, K. Inorganic sulfur oxidizing system in green sulfur bacteria.  
591 *Photosynthesis research* **104**, 163-176 (2010).
- 592 15. Dam, B., Mandal, S., Ghosh, W., Das Gupta, S. K. & Roy, P. The S4-intermediate pathway for the oxidation  
593 of thiosulfate by the chemolithoautotroph *Tetrathiothiobacter kashmirensis* and inhibition of tetrathionate  
594 oxidation by sulfite. *Research in microbiology* **158**, 330-338 (2007).
- 595 16. Hensen, D., Sperling, D., Truper, H. G., Brune, D. C. & Dahl, C. Thiosulphate oxidation in the phototrophic  
596 sulphur bacterium *Allochromatium vinosum*. *Molecular microbiology* **62**, 794-810 (2006).
- 597 17. Zhang, J. et al. A novel bacterial thiosulfate oxidation pathway provides a new clue about the formation of  
598 zero-valent sulfur in deep sea. *ISME J* **14**, 2261-2274 (2020).
- 599 18. Lahme, S. et al. Comparison of sulfide-oxidizing *Sulfurimonas* strains reveals a new mode of thiosulfate  
600 formation in subsurface environments. *Environ Microbiol* **22**, 1784-1800 (2020).
- 601 19. Marcia M, Ermler U, Peng GH & Michel H. A new structure-based classification of sulfide: quinone  
602 oxidoreductases. *Proteins* **78**, 1073-1083 (2010).
- 603 20. Lencina, A. M., Ding, Z. Q., Schurig-Briccio, L. A. & Gennis, R. B. Characterization of the Type III sulfide:

- 604 quinone oxidoreductase from *Caldivirga maquilingensis* and its membrane binding. *Biochim Biophys Acta*  
605 **1827**, 266-275 (2013).
- 606 21. Brito, J. A. et al. Structural and functional insights into sulfide: quinone oxidoreductase. *Biochemistry* **48**,  
607 5613-5622 (2009).
- 608 22. Muller, H., Marozava, S., Probst, A. J. & Meckenstock, R. U. Groundwater cable bacteria conserve energy by  
609 sulfur disproportionation. *ISME J* **14**, 623-634 (2020).
- 610 23. van Vliet, D. M. et al. The bacterial sulfur cycle in expanding dysoxic and euxinic marine waters. *Environ*  
611 *Microbiol* (2020).
- 612 24. Fang, W. W., Liang, Z. W., Liu, Y. L., Liao, J. Y. & Wang, S. Q. Metagenomic insights into production of zero  
613 valent sulfur from dissimilatory sulfate reduction in a methanogenic bioreactor. *Bioresour Technol Rep* **383**  
614 (2019).
- 615 25. Milucka, J. et al. Zero-valent sulphur is a key intermediate in marine methane oxidation. *Nature* **491**, 541-546  
616 (2012).
- 617 26. Labrado, A. L., Brunner, B., Bernasconi, S. M. & Peckmann, J. Formation of large native sulfur deposits does  
618 not require molecular oxygen. *Front Microbiol* **10** (2019).
- 619 27. Yu, H. et al. Comparative genomics and proteomic analysis of assimilatory sulfate reduction pathways in  
620 anaerobic methanotrophic archaea. *Front Microbiol* **9** (2018).
- 621 28. Fang, W., Gu, M., Liang, D., Chen, G. H. & Wang, S. Generation of zero valent sulfur from dissimilatory  
622 sulfate reduction under methanogenic conditions. *J Hazard Mater* **383** (2020).
- 623 29. Perez-Lopez, R. et al. Sulfate reduction processes in salt marshes affected by phosphogypsum: Geochemical  
624 influences on contaminant mobility. *J Hazard Mater* **350**, 154-161 (2018).
- 625 30. Grabarczyk, D. B. et al. Structural basis for specificity and promiscuity in a carrier protein/enzyme system  
626 from the sulfur cycle. *Proc Natl Acad Sci U S A* **112**, E7166-7175 (2015).
- 627 31. Anantharaman, K. et al. Expanded diversity of microbial groups that shape the dissimilatory sulfur cycle.  
628 *ISME J* **12**, 1715-1728 (2018).
- 629 32. Jorgensen, B. B. A thiosulfate shunt in the sulfur cycle of marine sediments. *Science* **249**, 152-154 (1990).
- 630 33. Feng, D. et al. Cold seep systems in the South China Sea: An overview. *J Asian Earth Sci* **168**, 3-16 (2018).
- 631 34. Wegener, G., Krukenberg, V., Riedel, D., Tegetmeyer, H. E. & Boetius, A. Intercellular wiring enables  
632 electron transfer between methanotrophic archaea and bacteria. *Nature* **526**, 587-590 (2015).
- 633 35. McGlynn, S. E., Chadwick, G. L., Kempes, C. P. & Orphan, V. J. Single cell activity reveals direct electron

- 634 transfer in methanotrophic consortia. *Nature* **526**, 531-535 (2015).
- 635 36. Wu, Y., Qiu, J. W., Qian, P. Y. & Wang, Y. The vertical distribution of prokaryotes in the surface sediment of  
636 Jiaolong cold seep at the northern South China Sea. *Extremophiles* **22**, 499-510 (2018).
- 637 37. Richter, M., Rossello-Mora, R., Glockner, F. O. & Peplies, J. JSpeciesWS: a web server for prokaryotic  
638 species circumscription based on pairwise genome comparison. *Bioinformatics* **32**, 929-931 (2016).
- 639 38. Medlar, A. J., Toronen, P. & Holm, L. AAI-profiler: fast proteome-wide exploratory analysis reveals  
640 taxonomic identity, misclassification and contamination. *Nucleic Acids Res* **46**, W479-W485 (2018).
- 641 39. Burns, J. L. & DiChristina, T. J. Anaerobic respiration of elemental sulfur and thiosulfate by *Shewanella*  
642 *oneidensis* MR-1 Requires psrA, a homolog of the phsA gene of *Salmonella enterica* serovar Typhimurium  
643 LT2. *Appl Environ Microb* **75**, 5209-5217 (2009).
- 644 40. Aketagawa, J., Kobayashi, K. & Ishimoto, M. Purification and properties of thiosulfate reductase from  
645 *Desulfovibrio vulgaris*, Miyazaki F. *J Biochem* **97**, 1025-1032 (1985).
- 646 41. Chen, Z. G. et al. The complete pathway for thiosulfate utilization in *Saccharomyces cerevisiae*. *Appl Environ*  
647 *Microb* **84** (2018).
- 648 42. Bak, F. & Cypionka, H. A novel type of energy metabolism involving fermentation of inorganic sulphur  
649 compounds. *Nature* **326**, 891-892 (1987).
- 650 43. Jorgensen, B. B. & Bak, F. Pathways and microbiology of thiosulfate transformations and sulfate reduction in  
651 a marine sediment (kattegat, denmark). *Appl Environ Microbiol* **57**, 847-856 (1991).
- 652 44. Wells, M. et al. Respiratory selenite reductase from *Bacillus selenitireducens* strain MLS10. *J Bacteriol* **201**  
653 (2019).
- 654 45. Beauchamp, R. O., Jr., Bus, J. S., Popp, J. A., Boreiko, C. J. & Andjelkovich, D. A. A critical review of the  
655 literature on hydrogen sulfide toxicity. *Crit Rev Toxicol* **13**, 25-97 (1984).
- 656 46. Blachier, F. et al. Luminal sulfide and large intestine mucosa: friend or foe? *Amino acids* **39**, 335-347 (2010).
- 657 47. Kushkevych, I., Dordevic, D. & Vitezova, M. Toxicity of hydrogen sulfide toward sulfate-reducing bacteria  
658 *Desulfovibrio piger* Vib-7. *Arch Microbiol* **201**, 389-397 (2019).
- 659 48. Kumar, S., Stecher, G., Li, M., Knyaz, C. & Tamura, K. MEGA X: Molecular evolutionary genetics analysis  
660 across computing platforms. *Mol Biol Evol* **35**, 1547-1549 (2018).
- 661 49. Deng, W. K., Wang, Y. B., Liu, Z. X., Cheng, H. & Xue, Y. HemI: A toolkit for illustrating heatmaps. *Plos*  
662 *One* **9** (2014).
- 663 50. Trueper, H. G. & Schlegel, H. G. Sulphur metabolism in Thiorhodaceae. I. quantitative measurements on

- 664 growing cells of *Chromatium Okenii*. *Antonie van Leeuwenhoek* **30**, 225-238 (1964).
- 665 51. Kelly, D. P. & Wood, A. P. in *Methods in Enzymology* Vol. 243 475-501 (Academic Press, 1994).
- 666 52. Houghton, J. L. et al. Thiosulfate oxidation by *Thiomicrospira thermophila*: metabolic flexibility in response  
667 to ambient geochemistry. *Environ Microbiol* **18**, 3057-3072 (2016).
- 668 53. Livak, K. J. & Schmittgen, T. D. Analysis of relative gene expression data using real-time quantitative PCR  
669 and the 2(T)(-Delta Delta C) method. *Methods* **25**, 402-408 (2001).
- 670 54. Perez-Riverol, Y. et al. The PRIDE database and related tools and resources in 2019: improving support for  
671 quantification data. *Nucleic Acids Res* **47**, D442-D450 (2019).
- 672
- 673
- 674
- 675
- 676
- 677
- 678
- 679
- 680
- 681
- 682
- 683
- 684
- 685
- 686
- 687
- 688
- 689
- 690
- 691
- 692
- 693
- 694
- 695
- 696

---

697 **Figure Legends**

698 **Fig. 1 Responses of *D. marinus* CS1 to different sulfur sources.** (a) Growth assays  
699 of *D. marinus* CS1 that cultured in the SRM medium supplemented with different  
700 sulfur sources, including Na<sub>2</sub>SO<sub>4</sub> (20 mM), Na<sub>2</sub>S<sub>2</sub>O<sub>3</sub> (40 mM), Na<sub>2</sub>SO<sub>3</sub> (10 mM) and  
701 Na<sub>2</sub>S (10 mM). “Control” indicates *D. marinus* CS1 was cultured in the SRM medium.  
702 (b-f) TEM observation of morphology changes of *D. marinus* CS1 that cultured in the  
703 medium supplemented with different sulfur sources as shown in panel A. Scale bars, 2  
704 μm. (g-i) Proteomics based heat map showing all significantly down- and  
705 up-regulated proteins associated with sulfur metabolism in *D. marinus* CS1 when  
706 cultured in the medium supplemented with 40 mM Na<sub>2</sub>S<sub>2</sub>O<sub>3</sub> (g), 10 mM Na<sub>2</sub>SO<sub>3</sub> (h)  
707 and 10 mM Na<sub>2</sub>S (i), respectively. The numbers shown in the heat map represent the  
708 fold change of proteins compared to the control group. Abbreviations: QmoA,  
709 CoB-CoM heterodisulfide reductase iron-sulfur subunit A family protein; QmoB,  
710 hydrogenase iron-sulfur subunit; QmoC, quinone-interacting membrane -bound  
711 oxidoreductase complex subunit QmoC; AprA, adenylyl-sulfate reductase subunit  
712 alpha; AprB, adenylyl-sulfate reductase subunit beta; Sat, sulfate adenylyltransferase;  
713 DsrA, dissimilatory-type sulfite reductase subunit alpha; DsrB, dissimilatory-type  
714 sulfite reductase subunit beta; DsrC, TusE/DsrC/DsvC family sulfur relay protein;  
715 MetB, cystathionine gamma-synthase family protein; MetX, homoserine  
716 O-acetyltransferase; PhsA, thiosulfate reductase; DmsB, anaerobic dimethyl sulfoxide  
717 reductase subunit B; SQR, sulfide: quinone oxidoreductase; SsuA, aliphatic sulfonate  
718 ABC transporter. More detailed information about proteins shown in this Figure was

719 listed in the Supplementary Table 2.

720 **Fig. 2 *D. marinus* CS1 produces ZVS when cultured in the medium**

721 **supplemented with 40 mM Na<sub>2</sub>S<sub>2</sub>O<sub>3</sub>.** (a) Formation of obvious white substances by

722 *D. marinus* CS1 when cultured in the medium supplemented with 40 mM Na<sub>2</sub>S<sub>2</sub>O<sub>3</sub>

723 (indicated with red arrows). (b) SEM observation of white substances produced by *D.*

724 *marinus* CS1 shown in panel a. (c) Identification of major sulfur composition of white

725 substances produced by *D. marinus* CS1 via energy dispersive spectrum (EDS) assay.

726 (d) Confirmation of S<sub>8</sub> configuration of white substances produced by *D. marinus*

727 CS1 via Raman spectra assay. (e) Raman spectrum of standard S<sub>8</sub>.

728 **Fig. 3 Monitoring the dynamics of concentrations of different sulfur**

729 **intermediates and expression levels of *phsA* and *sqr* in the medium supplemented**

730 **with 40 mM Na<sub>2</sub>S<sub>2</sub>O<sub>3</sub> across the whole two-month incubation period.** Dynamics of

731 concentrations of sulfate, thiosulfate and ZVS in the medium supplemented with (a)

732 or without (b) 40 mM Na<sub>2</sub>S<sub>2</sub>O<sub>3</sub> across the whole two-month incubation period. The

733 error bars indicate the standard deviation (S.D.) from three different biological

734 replicates. Dynamics of the relative expression levels of *phsA* (c) and *sqr* (d) by

735 qRT-PCR in the medium supplemented with or without 40 mM Na<sub>2</sub>S<sub>2</sub>O<sub>3</sub> across the

736 whole two-month incubation period. All data are relative to the expression levels found

737 in the control group ± the standard error (N = 4). \*, *P* < 0.05; \*\*, *P* < 0.01.

738 **Fig. 4 Functional assays of key proteins driving formation of ZVS in *D. marinus***

739 **CS1.** (a) Overexpression of PhsA in *E. coli* promotes the transformation of S<sub>2</sub>O<sub>3</sub><sup>2-</sup> to



---

740 H<sub>2</sub>S. *E. coli* cells without or with expression of PhsA were incubated in LB medium  
741 supplemented with 40 mM Na<sub>2</sub>S<sub>2</sub>O<sub>3</sub> for 24 h. H<sub>2</sub>S accumulation was detected with  
742 lead-acetate paper strips. (b) Overexpression of SQR in *E. coli* promotes the  
743 transformation of H<sub>2</sub>S to other forms. *E. coli* cells without or with expression of SQR  
744 were incubated in LB medium supplemented with 40 mM Na<sub>2</sub>S<sub>2</sub>O<sub>3</sub> for 24 h. H<sub>2</sub>S  
745 accumulation was detected with lead-acetate paper strips. (c) Growth assays of *E. coli*  
746 cells without or with expression of SQR in LB medium supplemented with respective  
747 5 mM, 10 mM, 20 mM, 30 mM and 40 mM Na<sub>2</sub>S for 24 h. \*\* means  $P < 0.01$ .

748 **Fig. 5 Proteomic analyses of sulfur metabolism of *D. marinus* CS1 that cultured**  
749 **in the deep-sea cold seep.** (a) Representative picture showing the *in situ* experimental  
750 apparatus used in the deep-sea cold seep. (b) Proteome based heat map showing all  
751 different expressed proteins involved in sulfur metabolism after a 10-day incubation  
752 of *D. marinus* CS1 in the “In situ” group compared with “Lab condition” group. The  
753 numbers in the heat map represent the fold change of proteins compared to Lab  
754 conditions group. Abbreviations: DsyB-like, MTHB methyltransferase;  
755 dimethylsulphoniopropionate biosynthesis enzyme; CysQ, 3'(2'), 5'-bisphosphate  
756 nucleotidase. Other abbreviations are the same as shown in Figure 1. More detailed  
757 information about proteins shown in this Figure was listed in the Supplementary Table  
758 2.

759 **Fig. 6 Proposed model related to sulfur metabolism and ZVS formation of *D.***  
760 ***marinus* CS1.** Black solid lines represent the typical sulfate reduction pathway  
761 present in *D. marinus* CS1. Black dashed lines represent the direction of electron

762 transfer. Red lines represent the unique ZVS formation process present in *D. marinus*  
763 CS1. Abbreviations: APS, adenosine 5'-phosphosulfate; PAPS,  
764 3'-phosphoadenosine-5'-phosphosulfate (3'-phosphoadenylylsulfate); CysC,  
765 adenylyl-sulfate kinase; CysH, phosphoadenosine phosphosulfate reductase family  
766 protein; DsrD, dissimilatory sulfite reductase-associated protein; DsrK,  
767 [DsrC]-trisulfide reductase; DsrM, sulfate reduction electron transfer complex  
768 DsrMKJOP subunit; DsrN, cobyrinate a,c-diamide synthase; DsrJ, sulfate reduction  
769 electron transfer complex DsrMKJOP subunit; DsrO, 4Fe-4S dicluster domain  
770 -containing protein; DsrP, polysulfide reductase; DsrT, dissimilatory sulfite reductase  
771 system component; MetE, 5-methyltetrahydropteroyltriglutamate-homocysteine  
772 S-methyltransferase; MetH, methylenetetrahydrofolate reductase [NAD(P)H]; CysK,  
773 cysteine synthase. Other abbreviations are the same as shown in Figures 1 and 5. More  
774 detailed information about proteins shown in this figure was listed in the  
775 Supplementary Table 2.

776



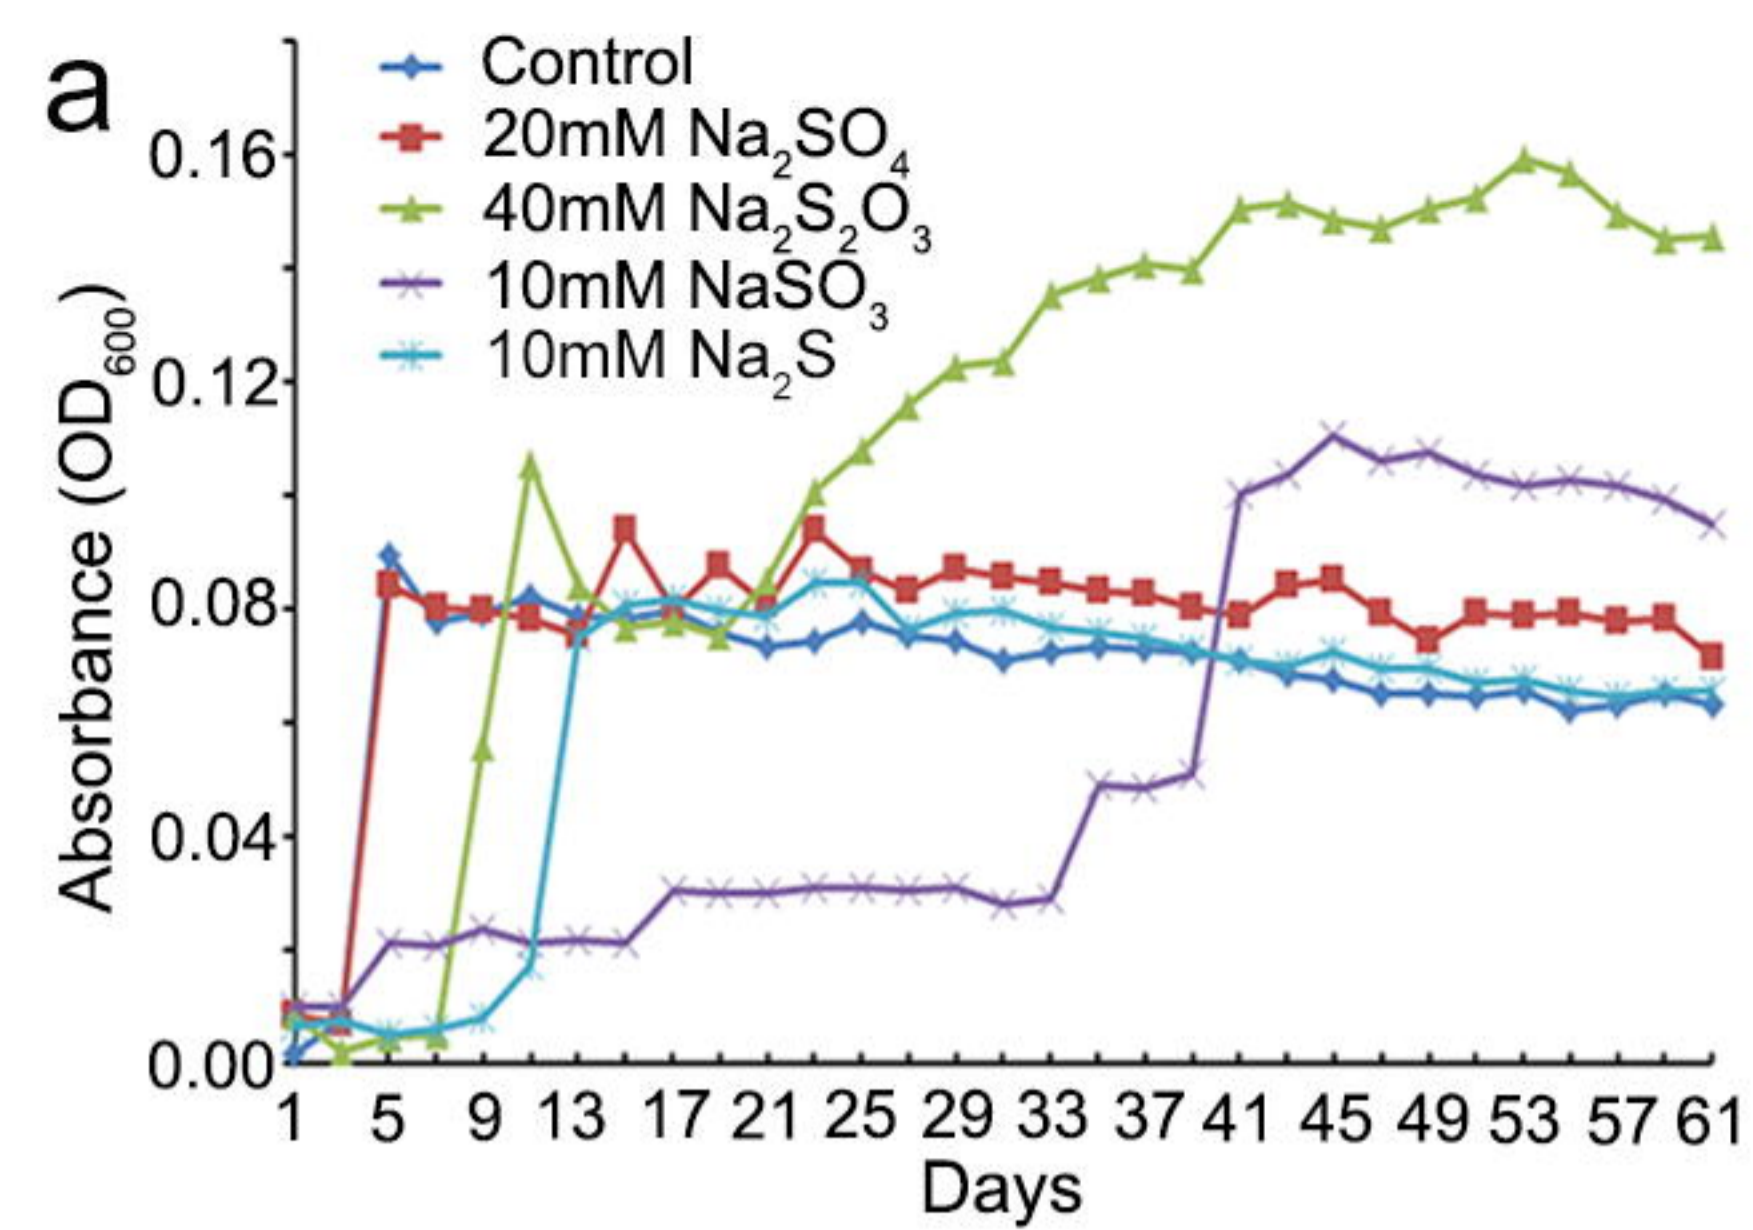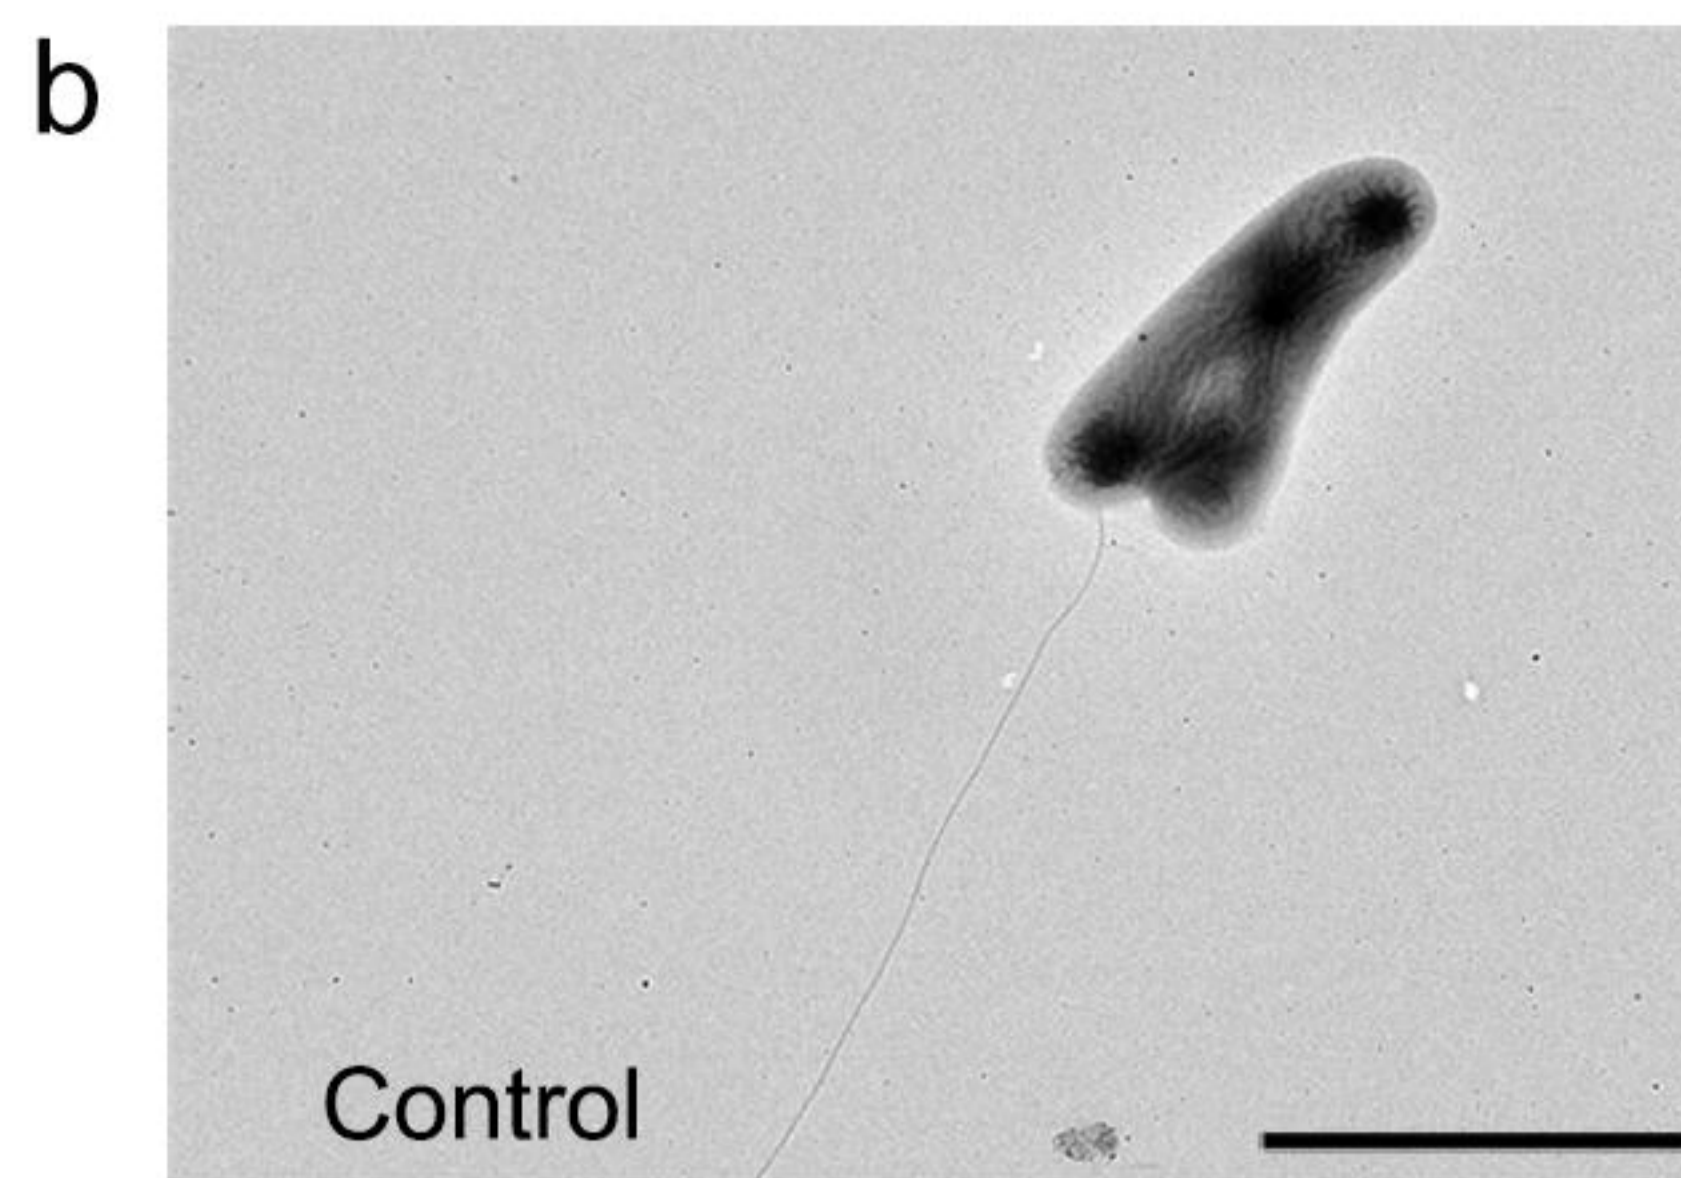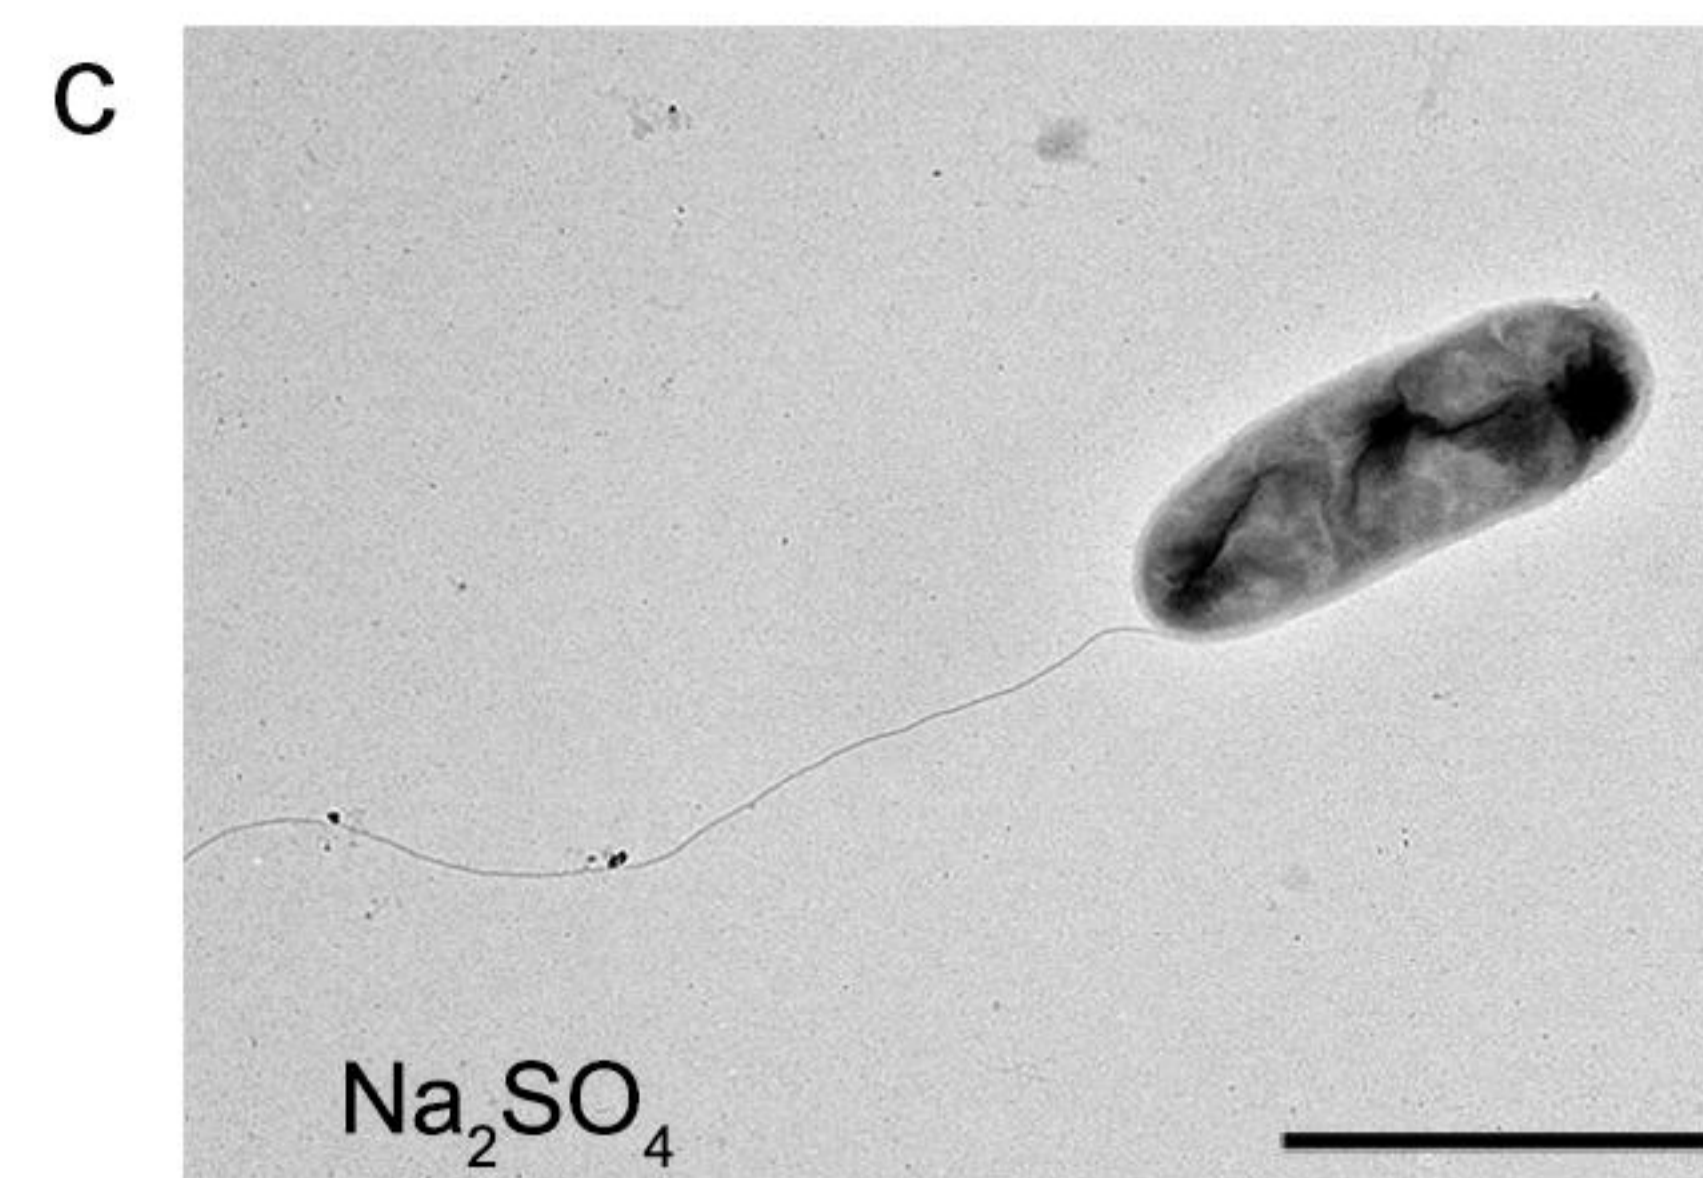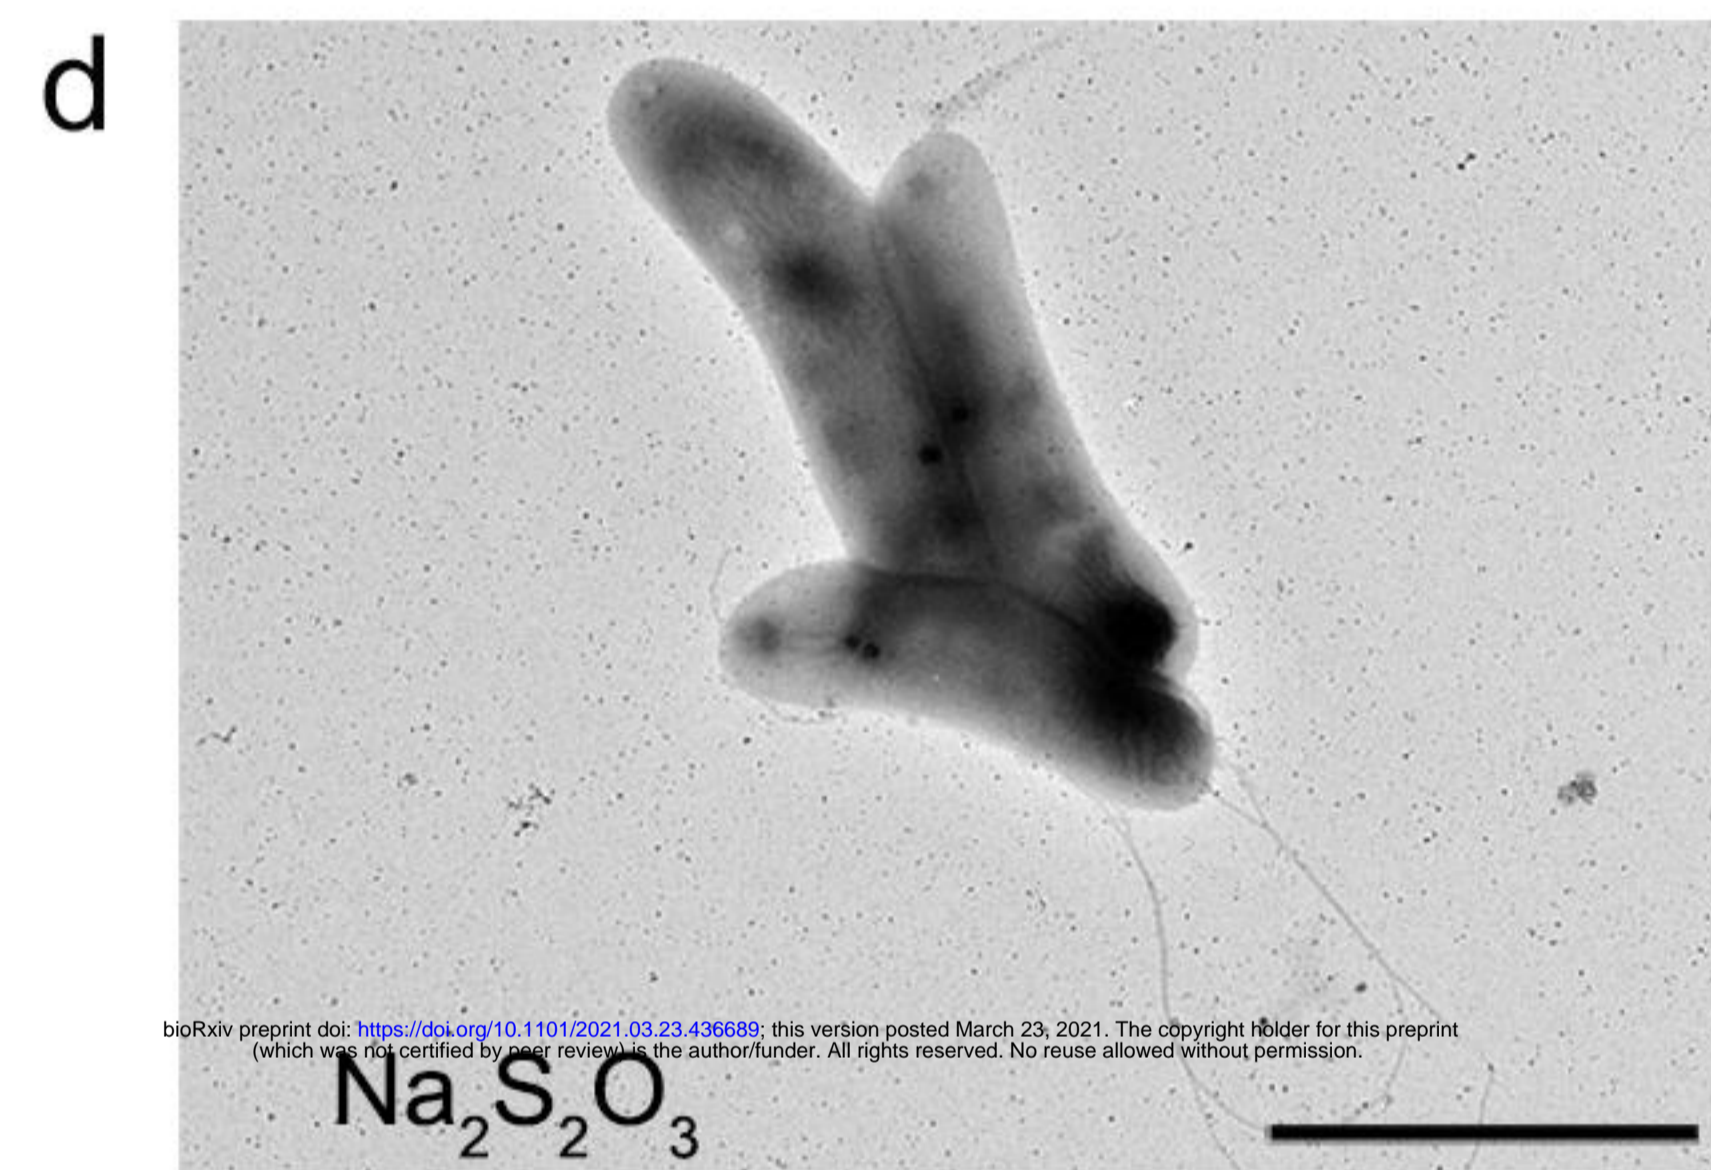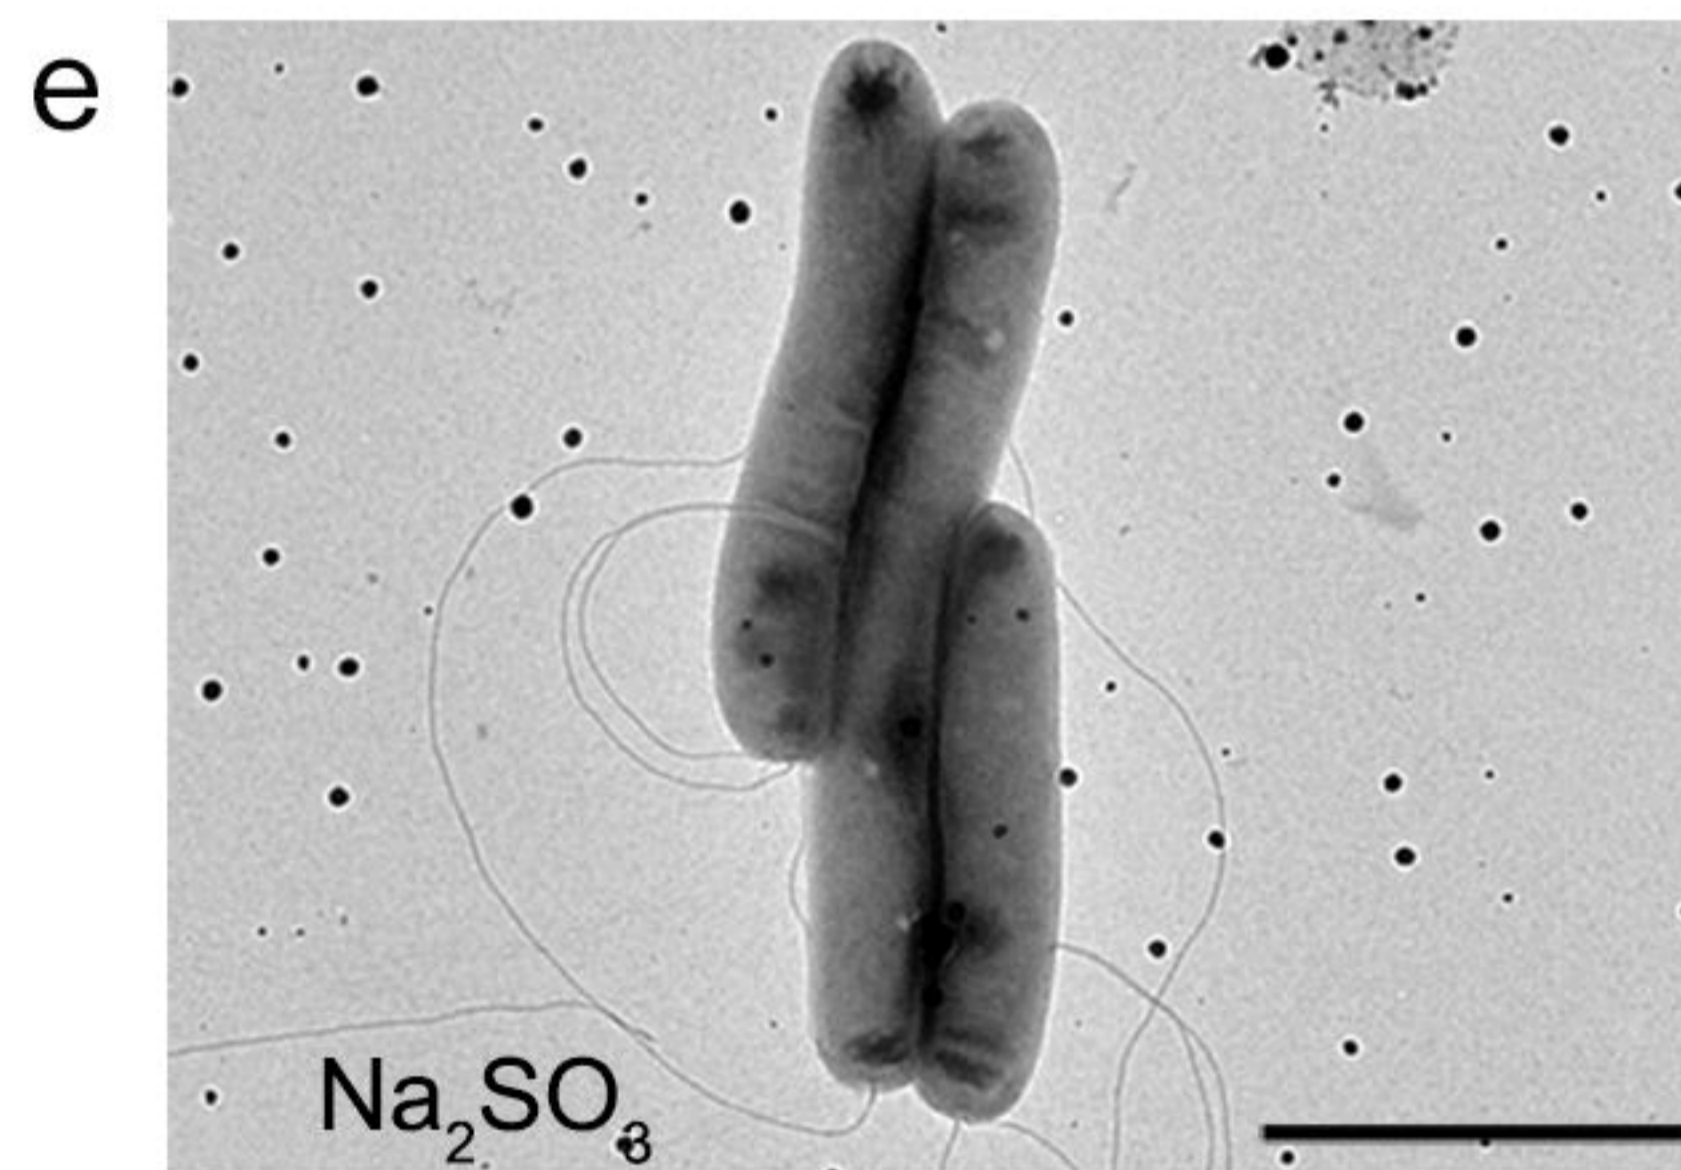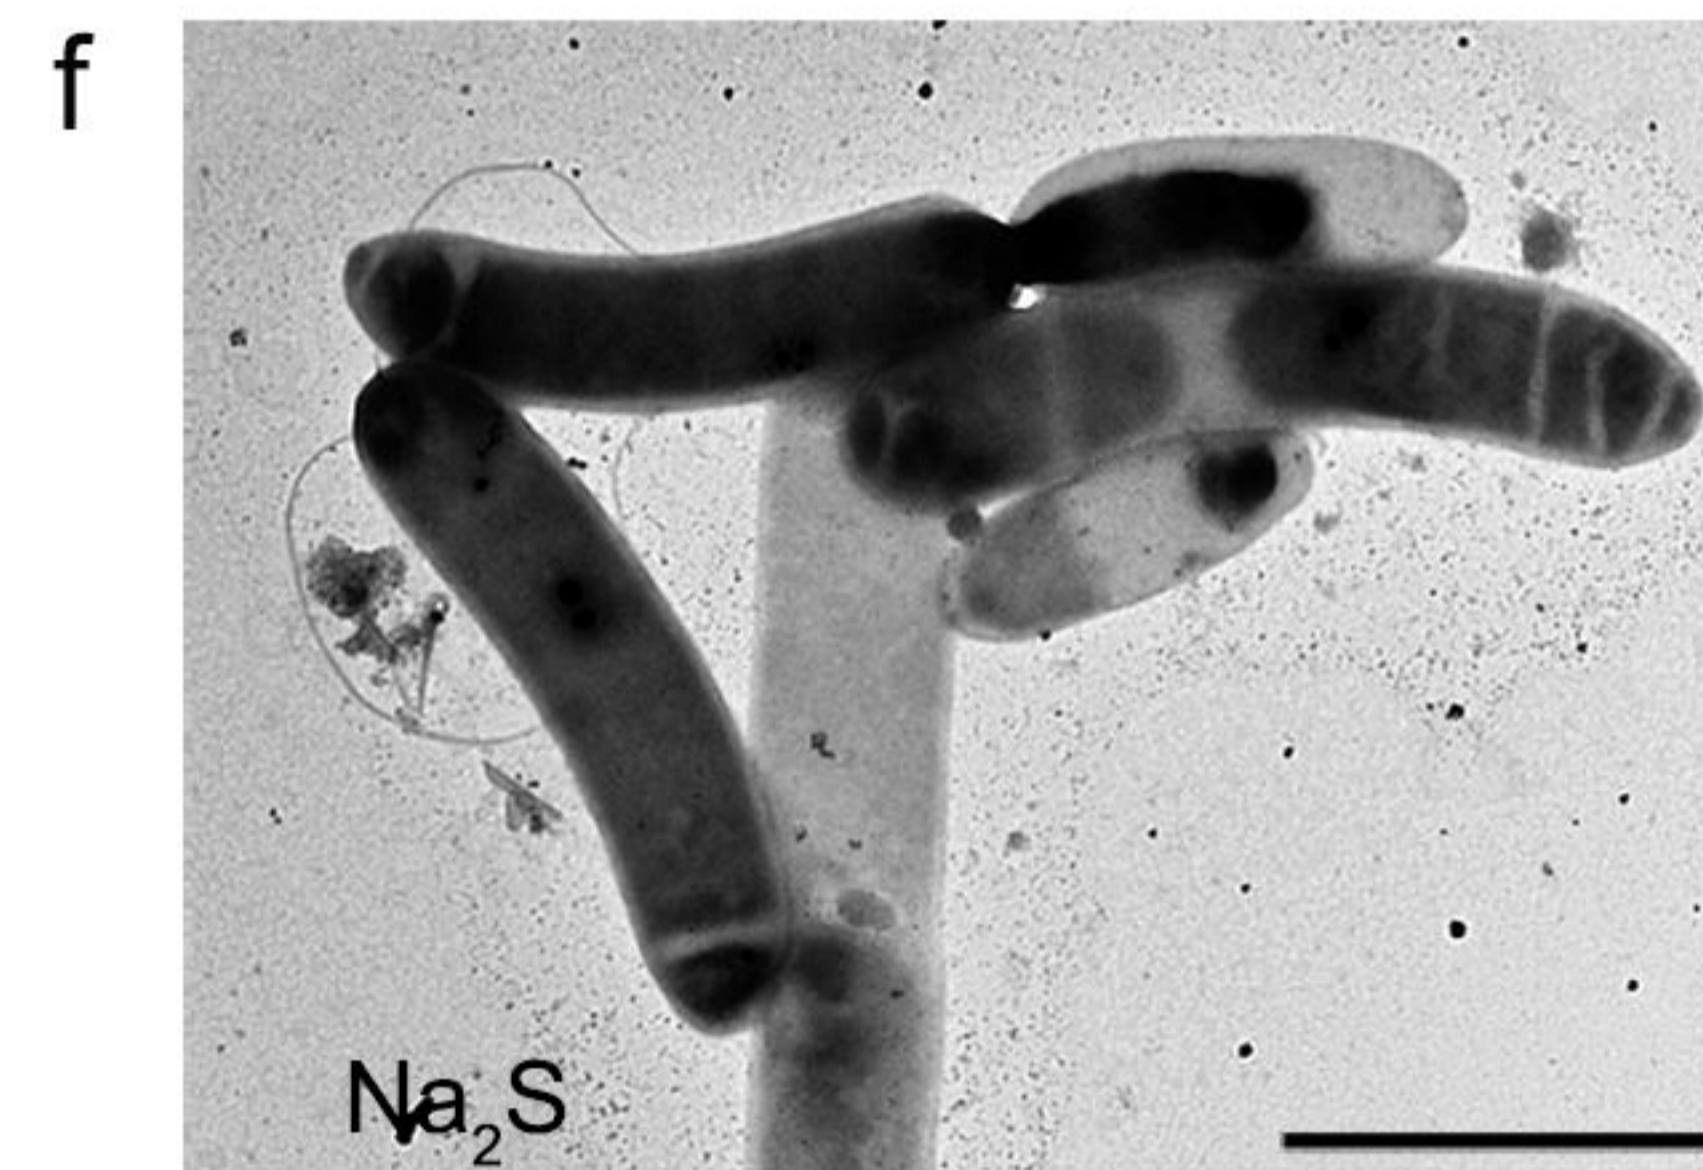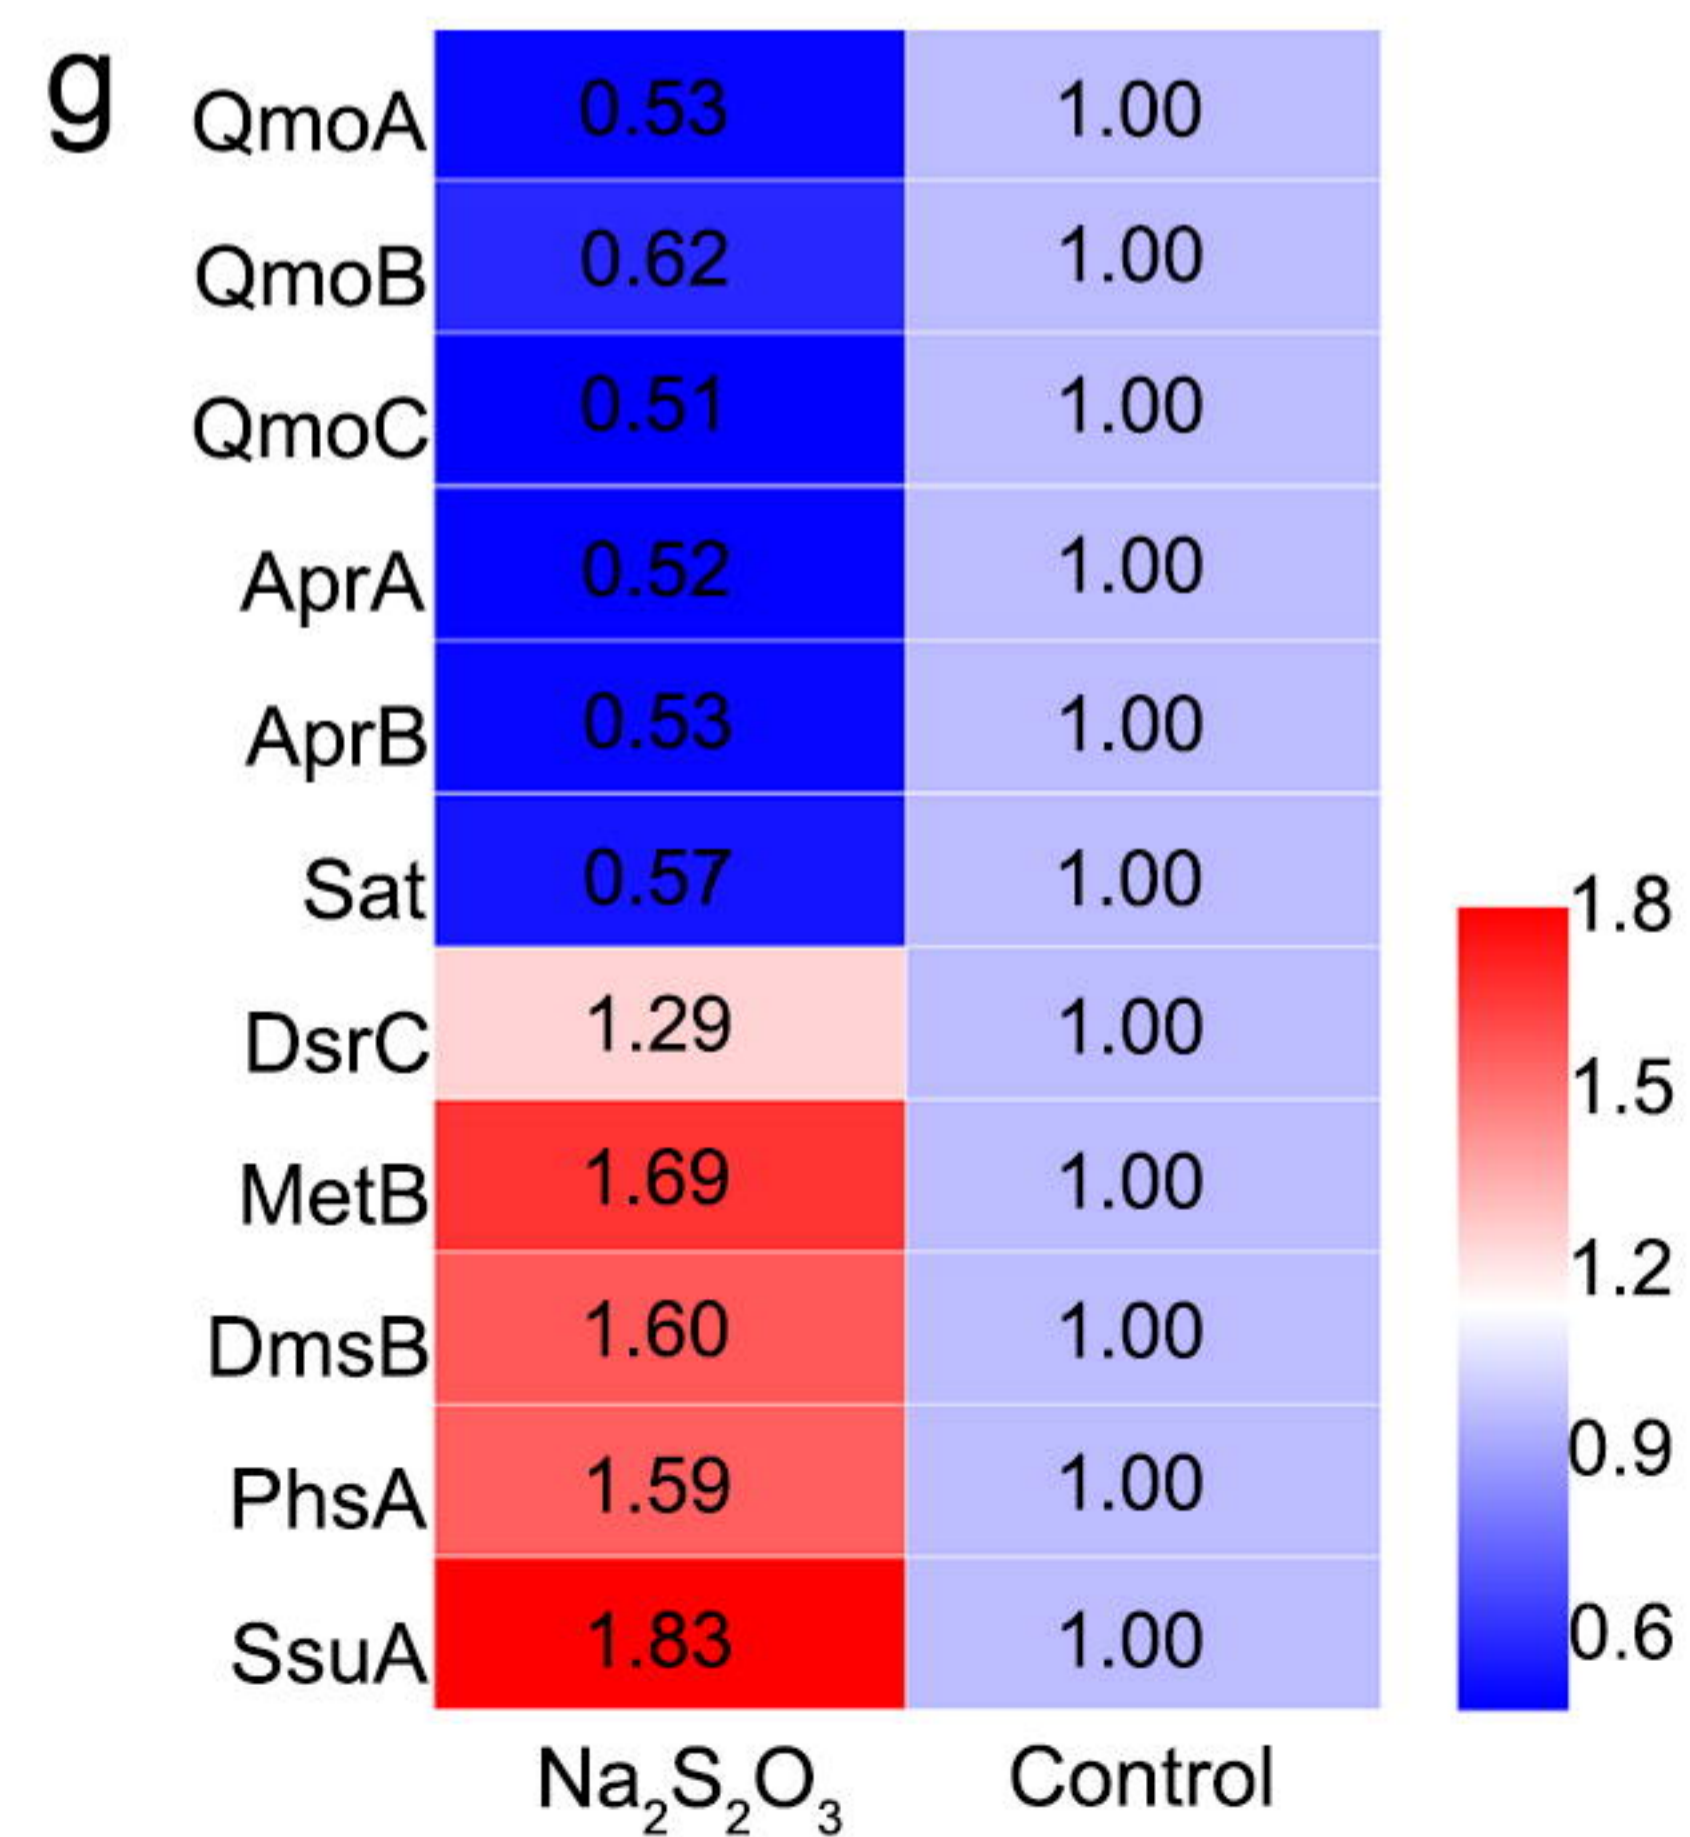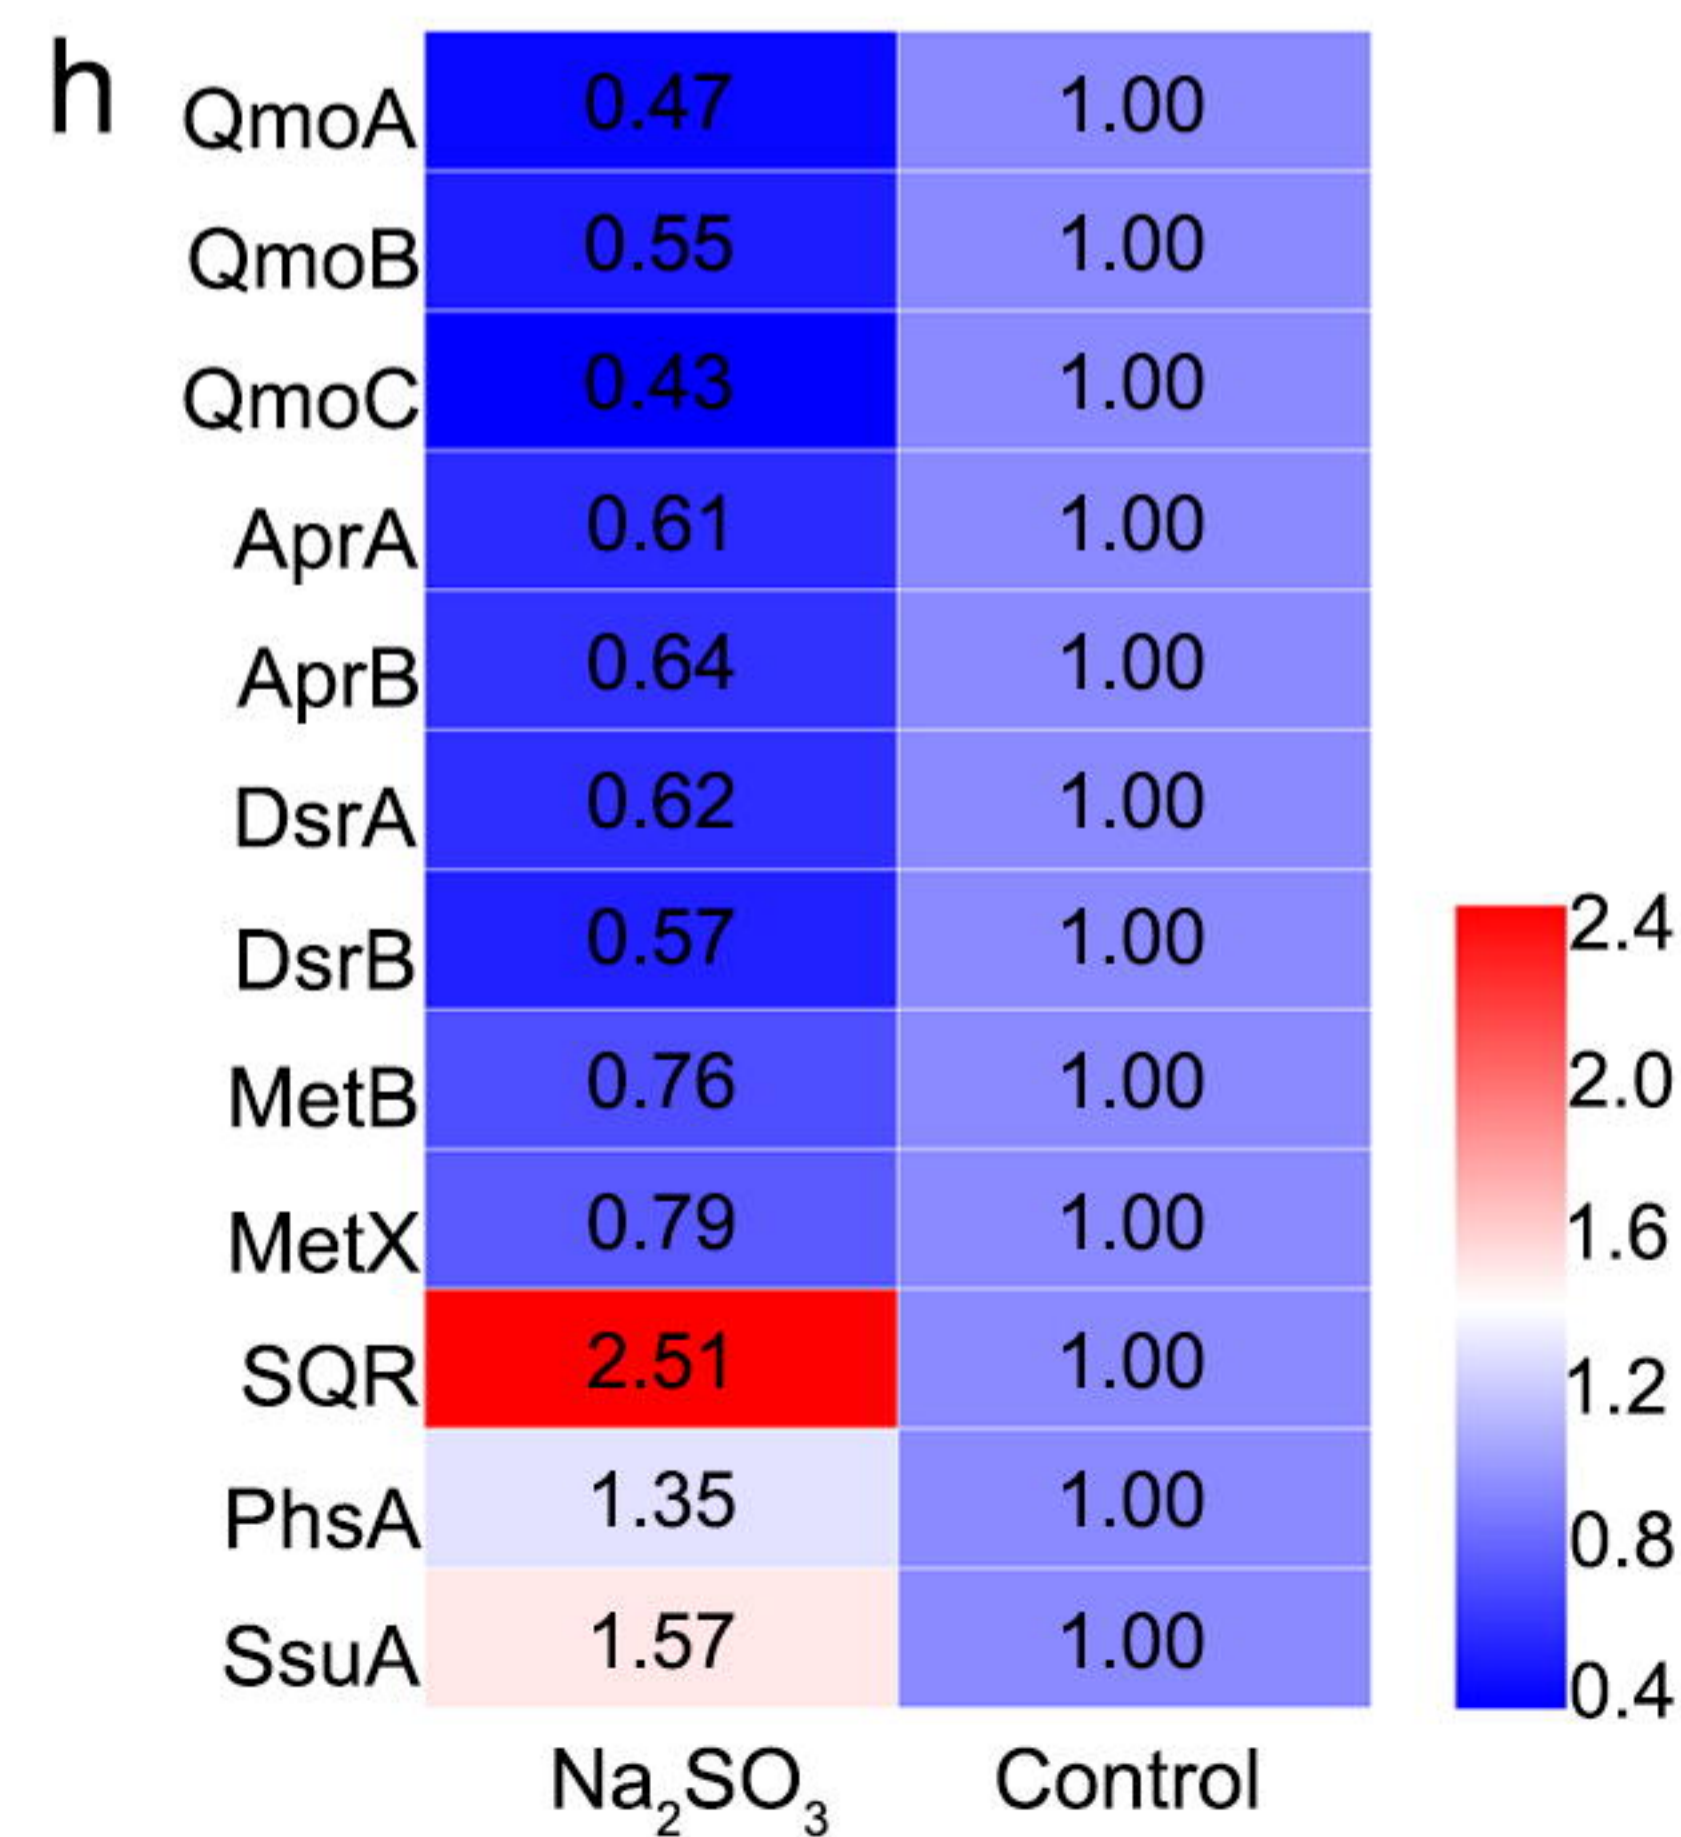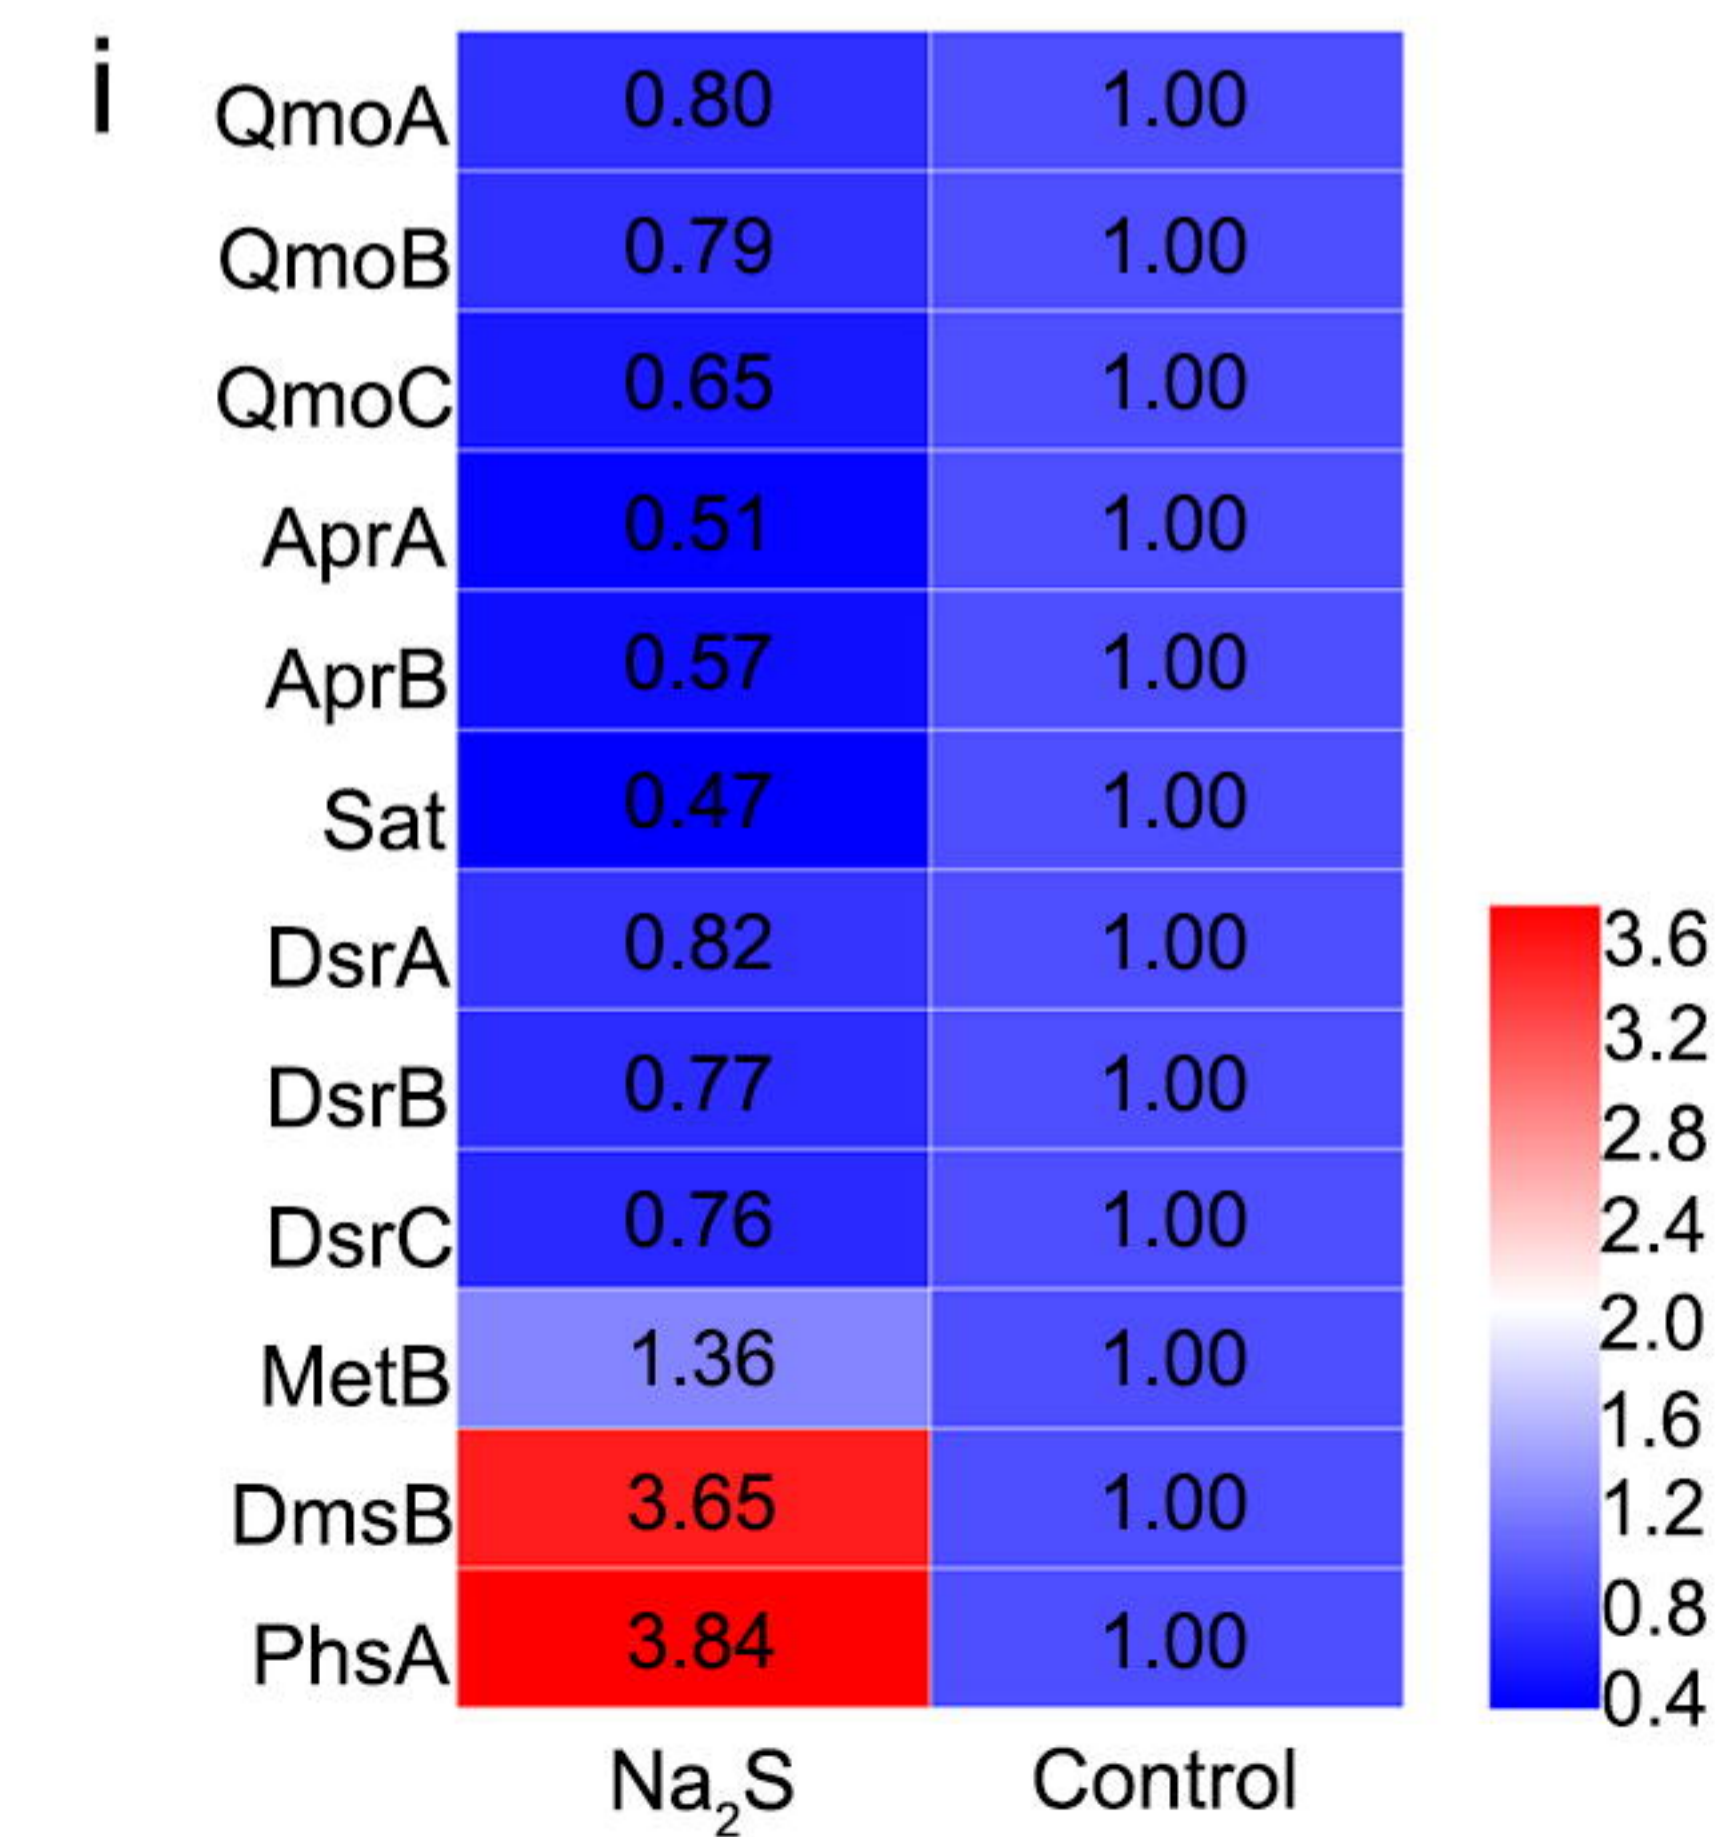



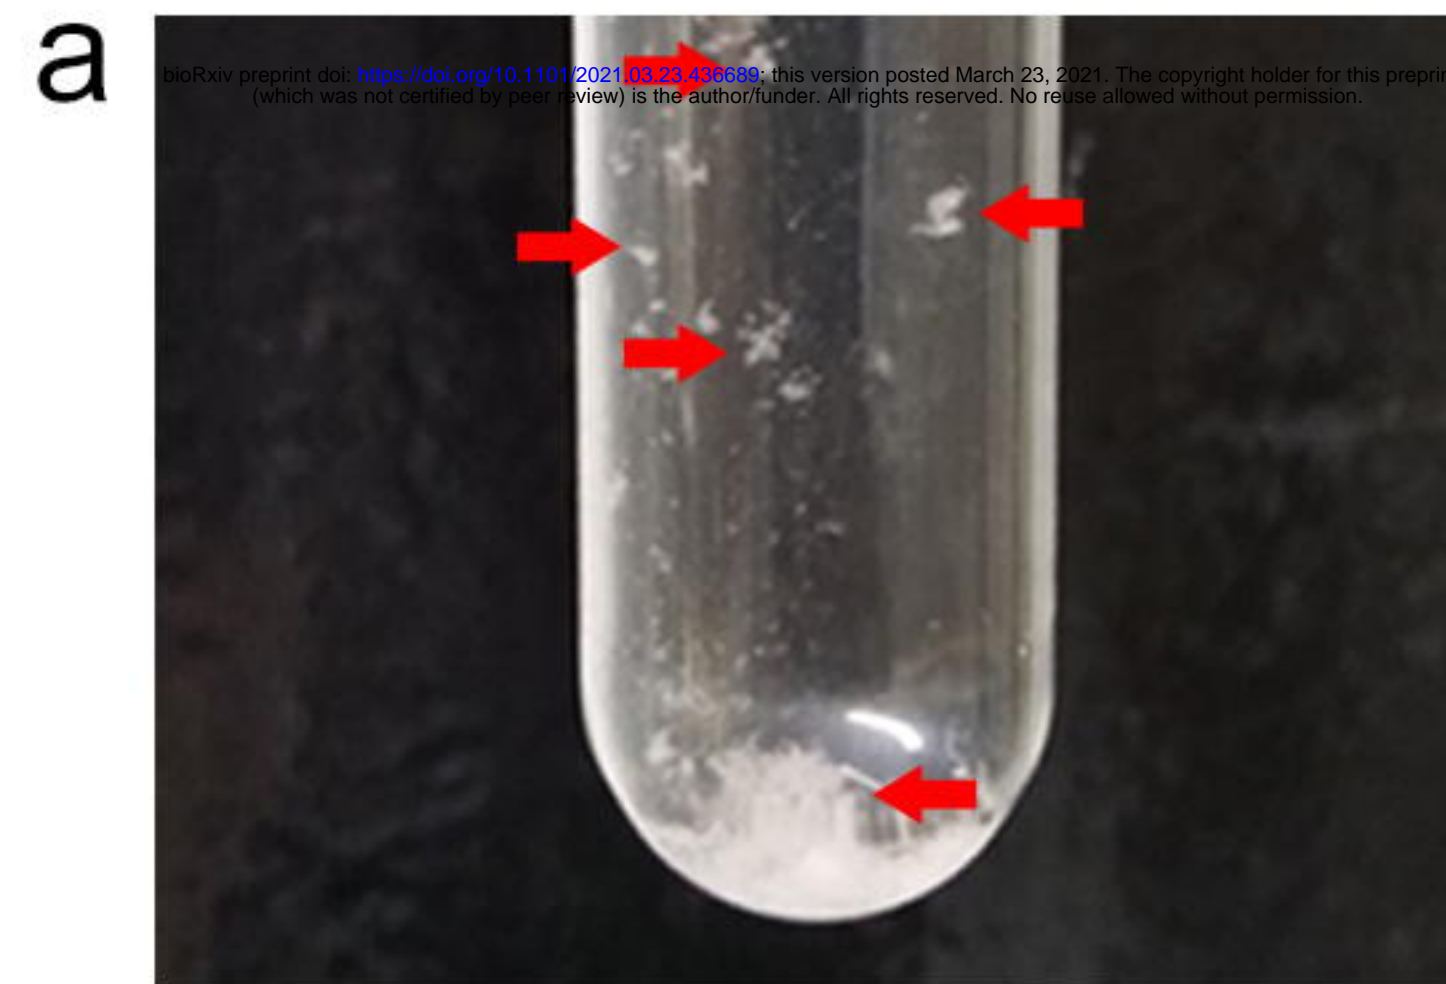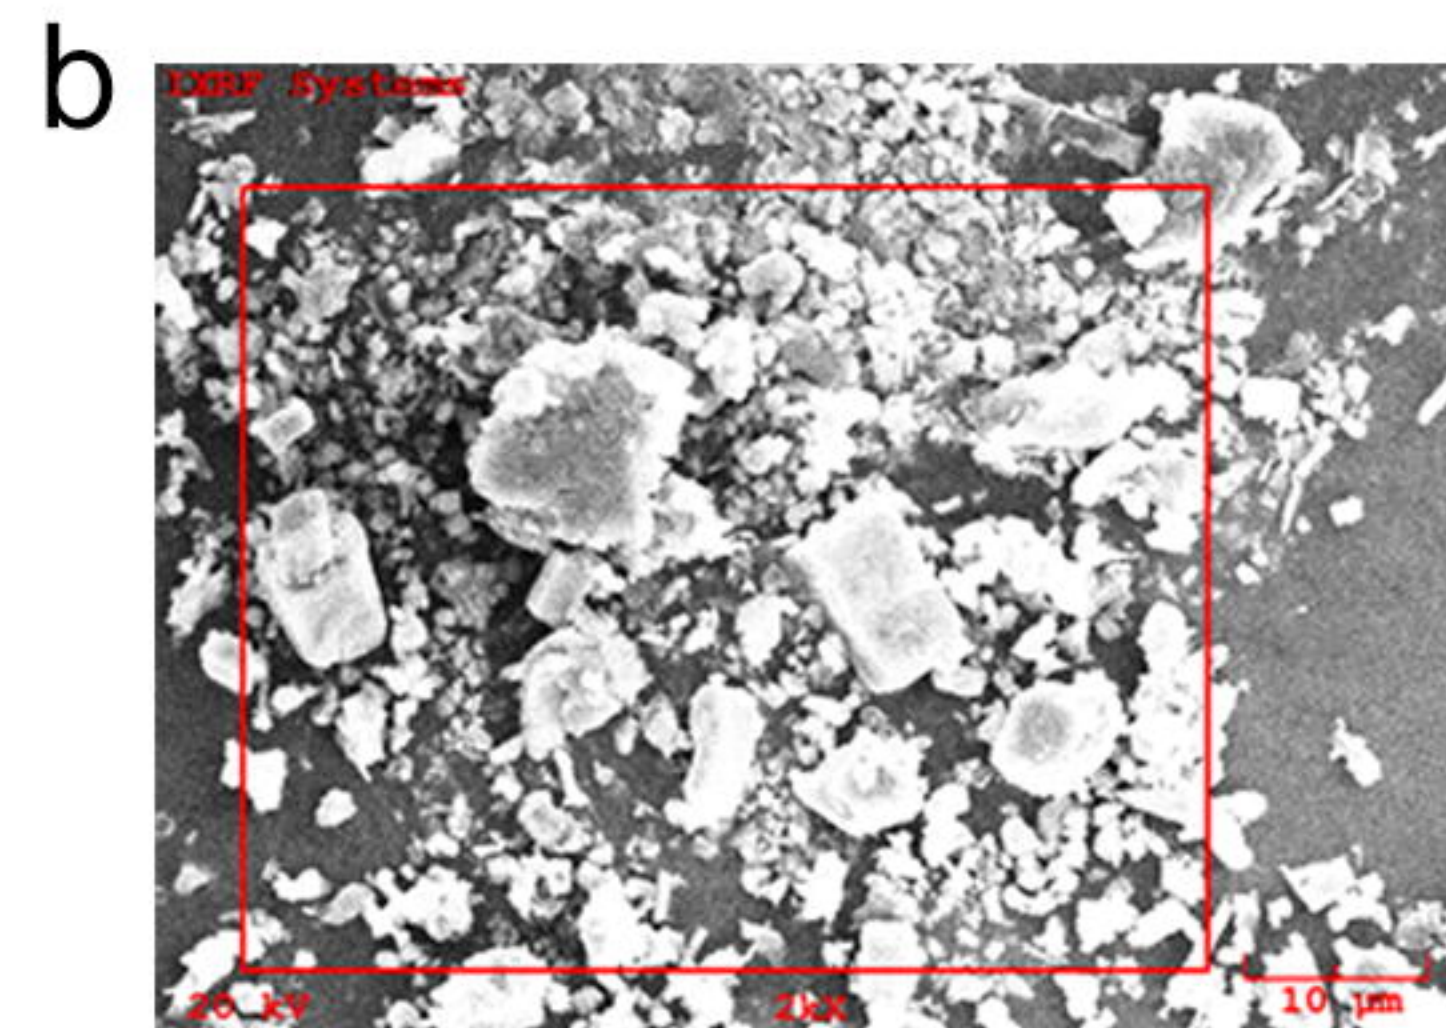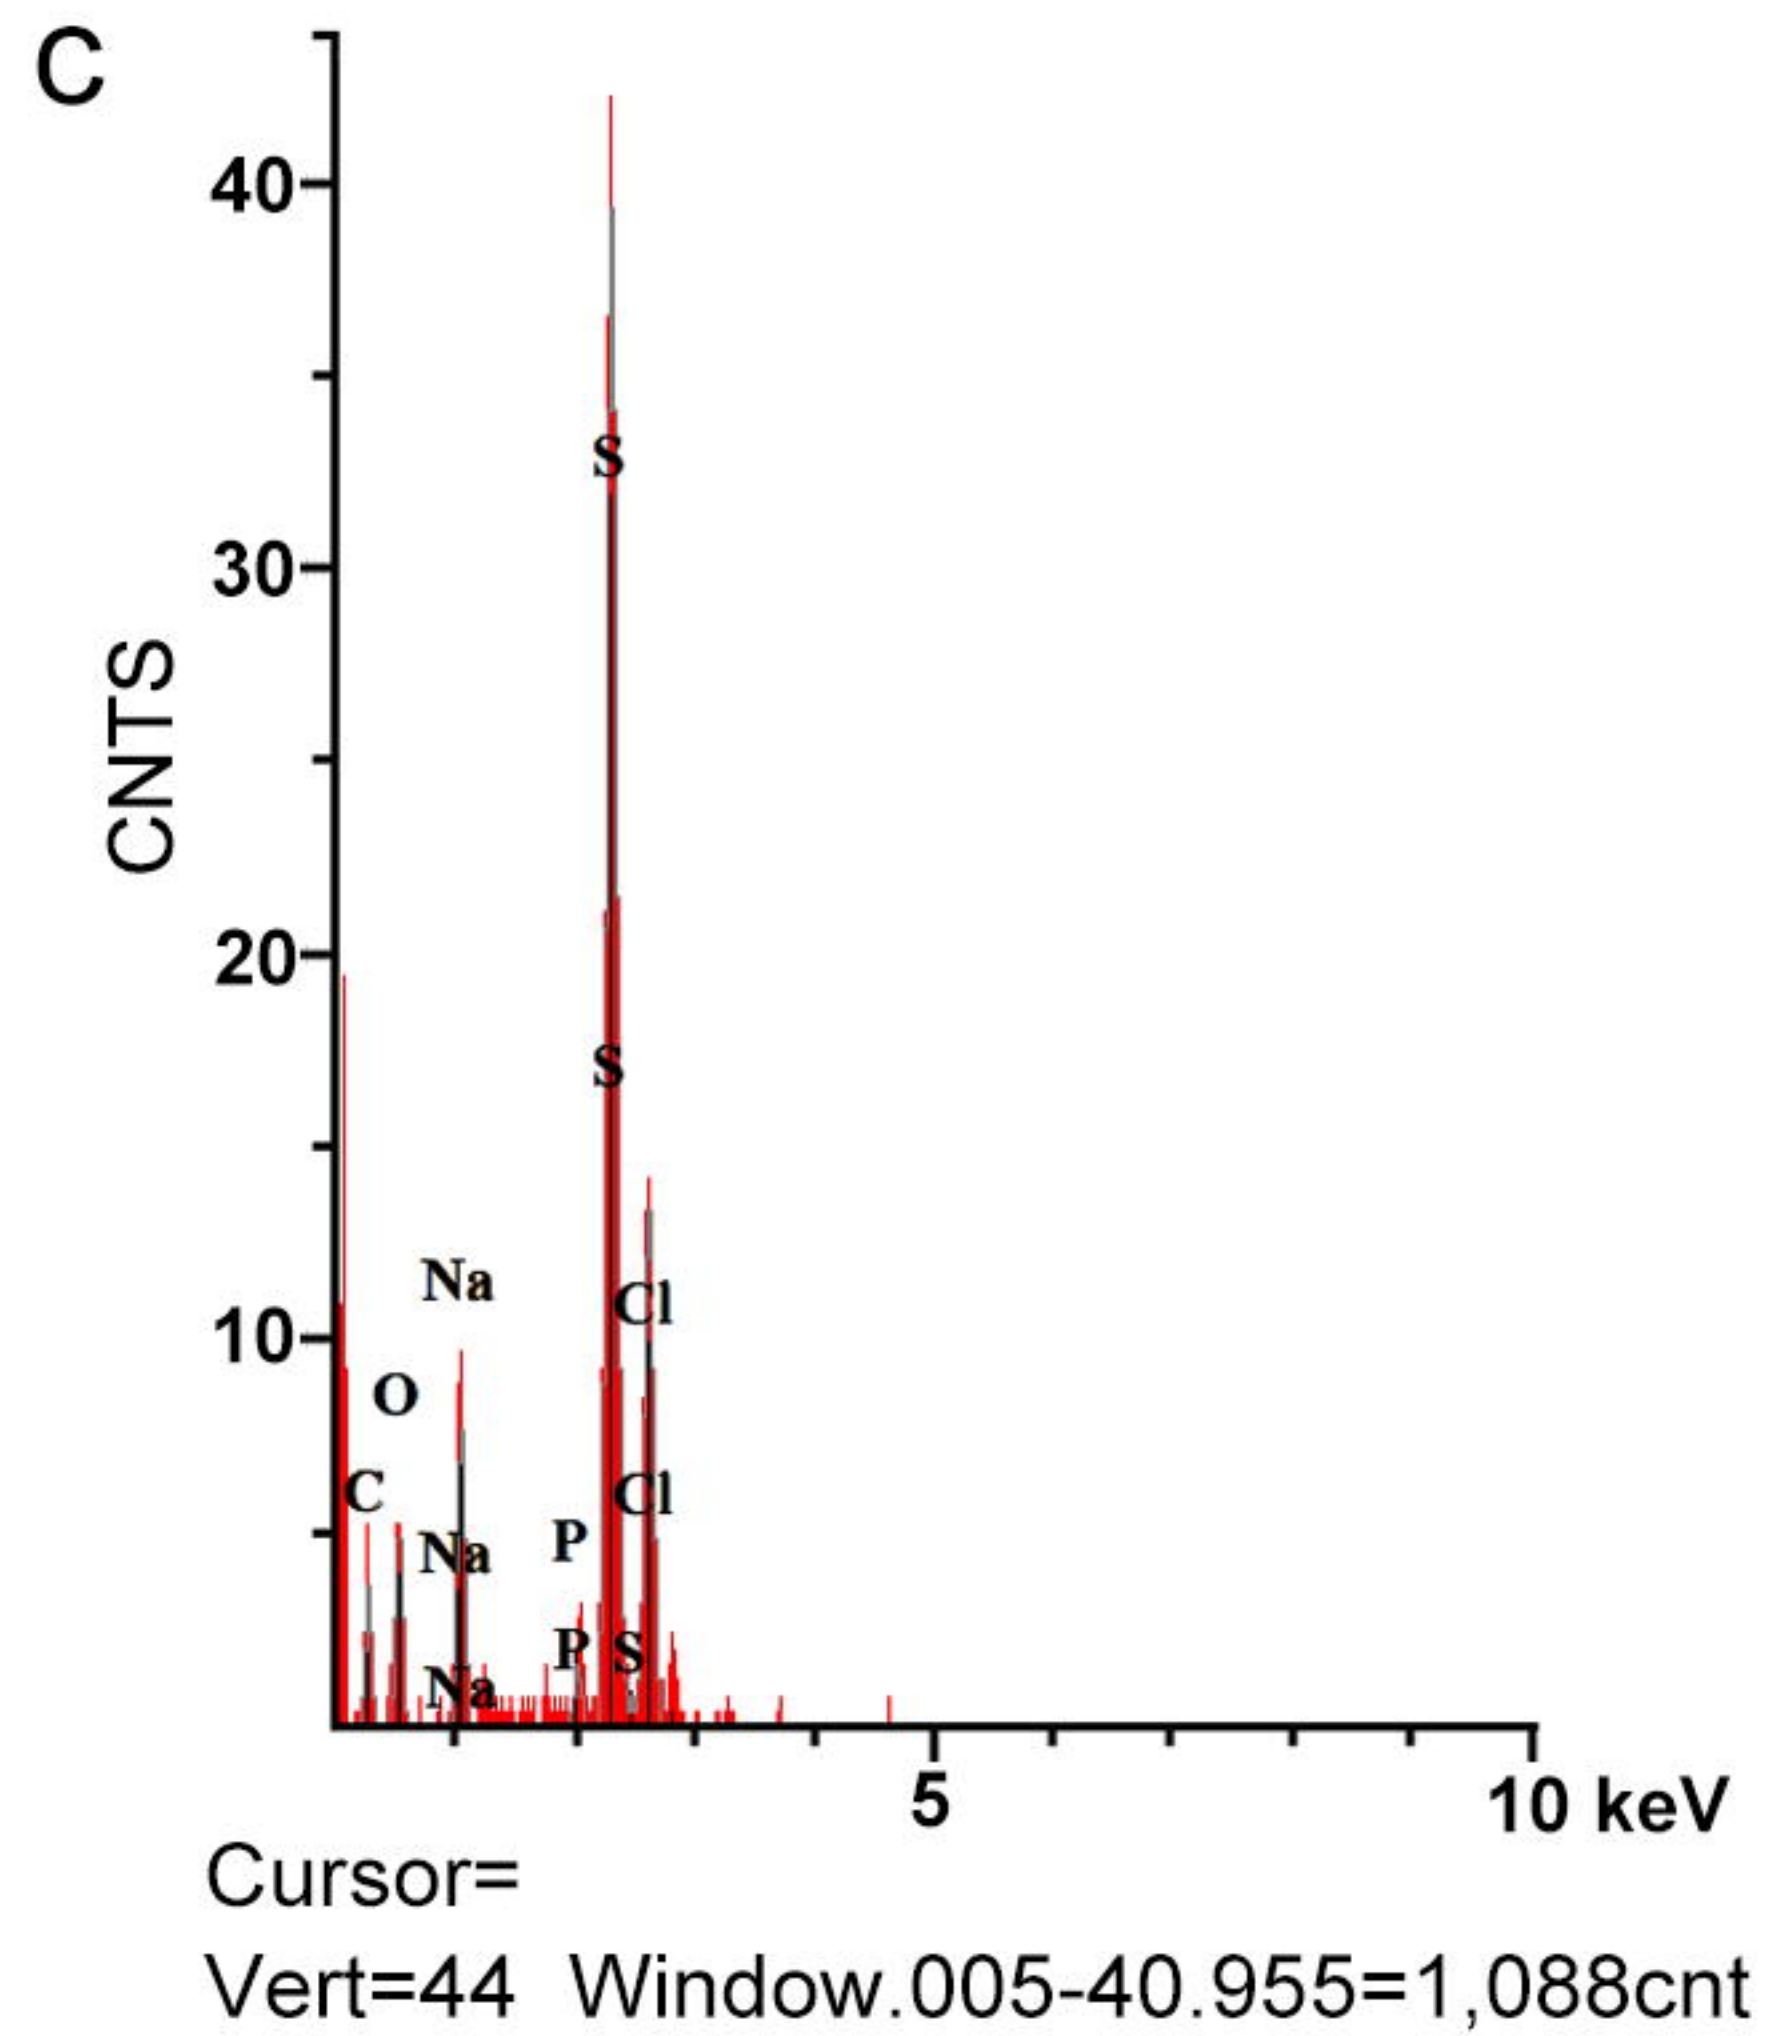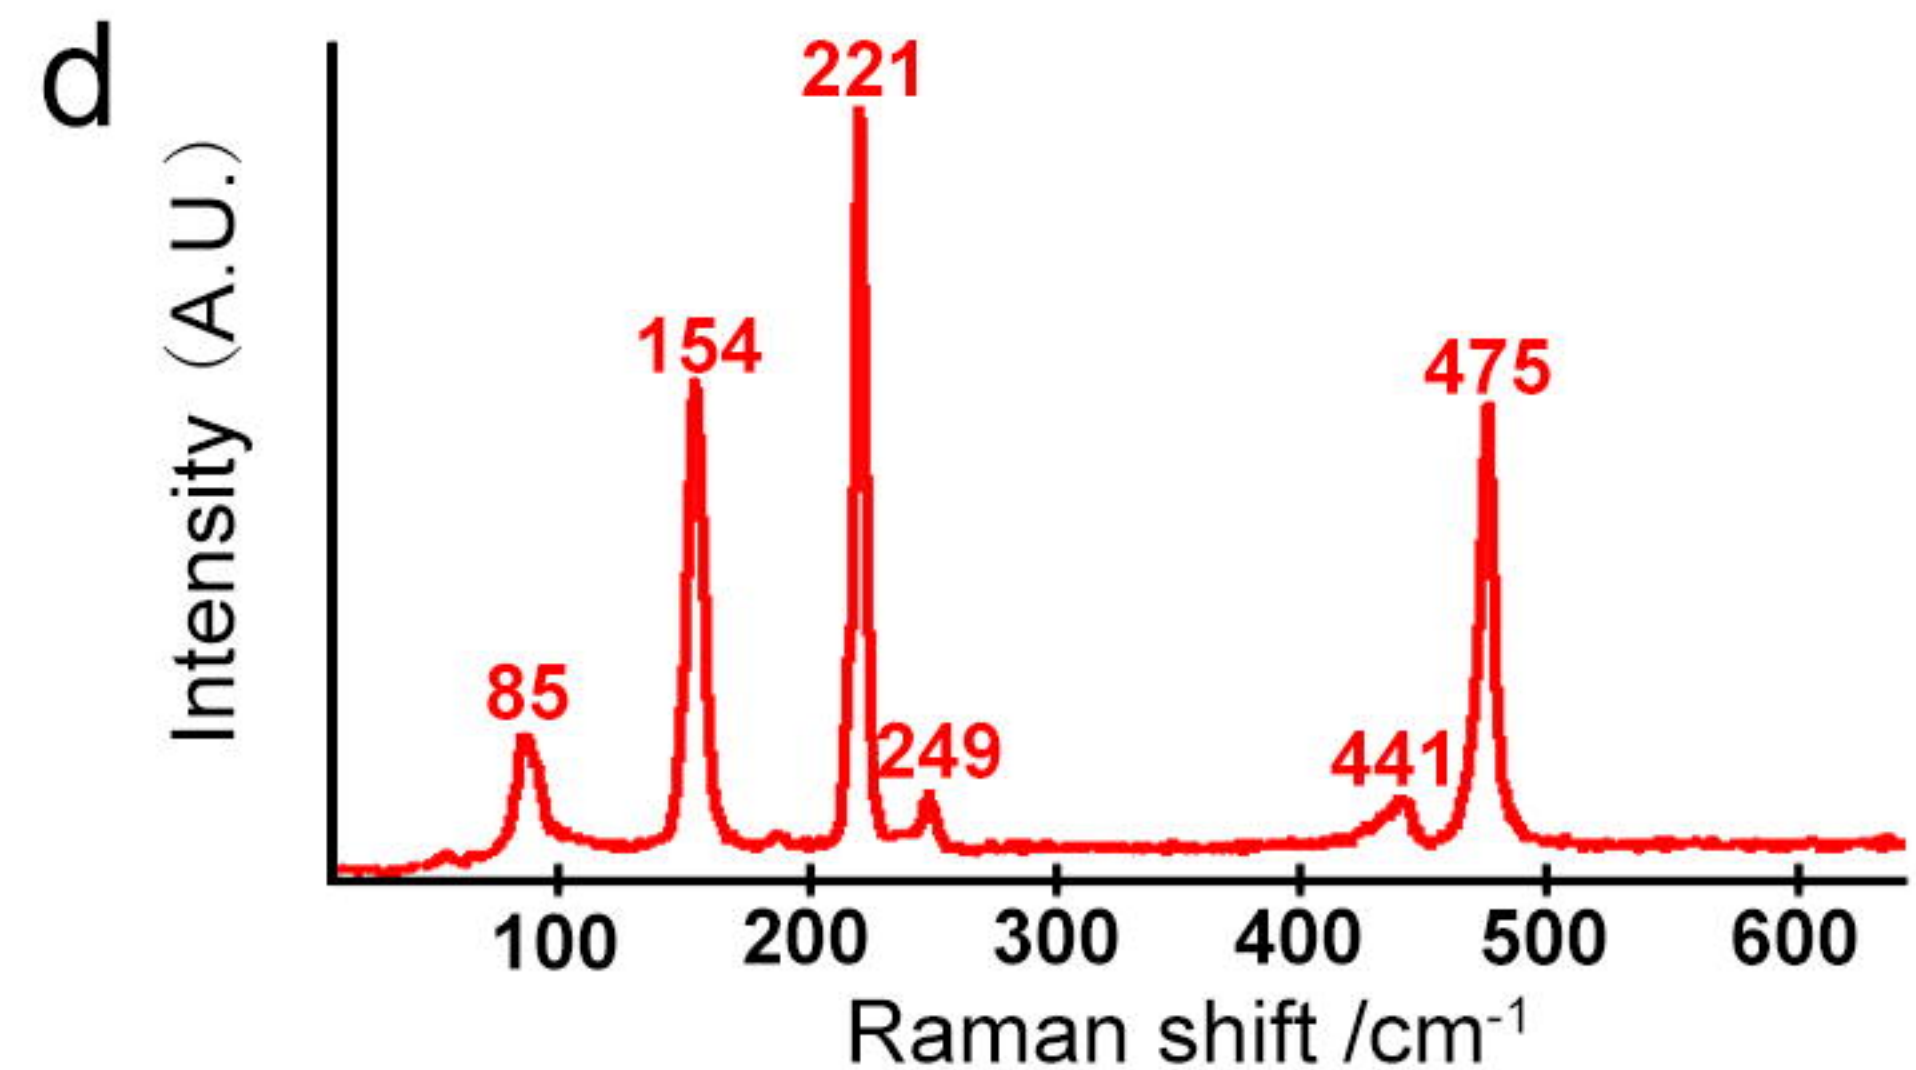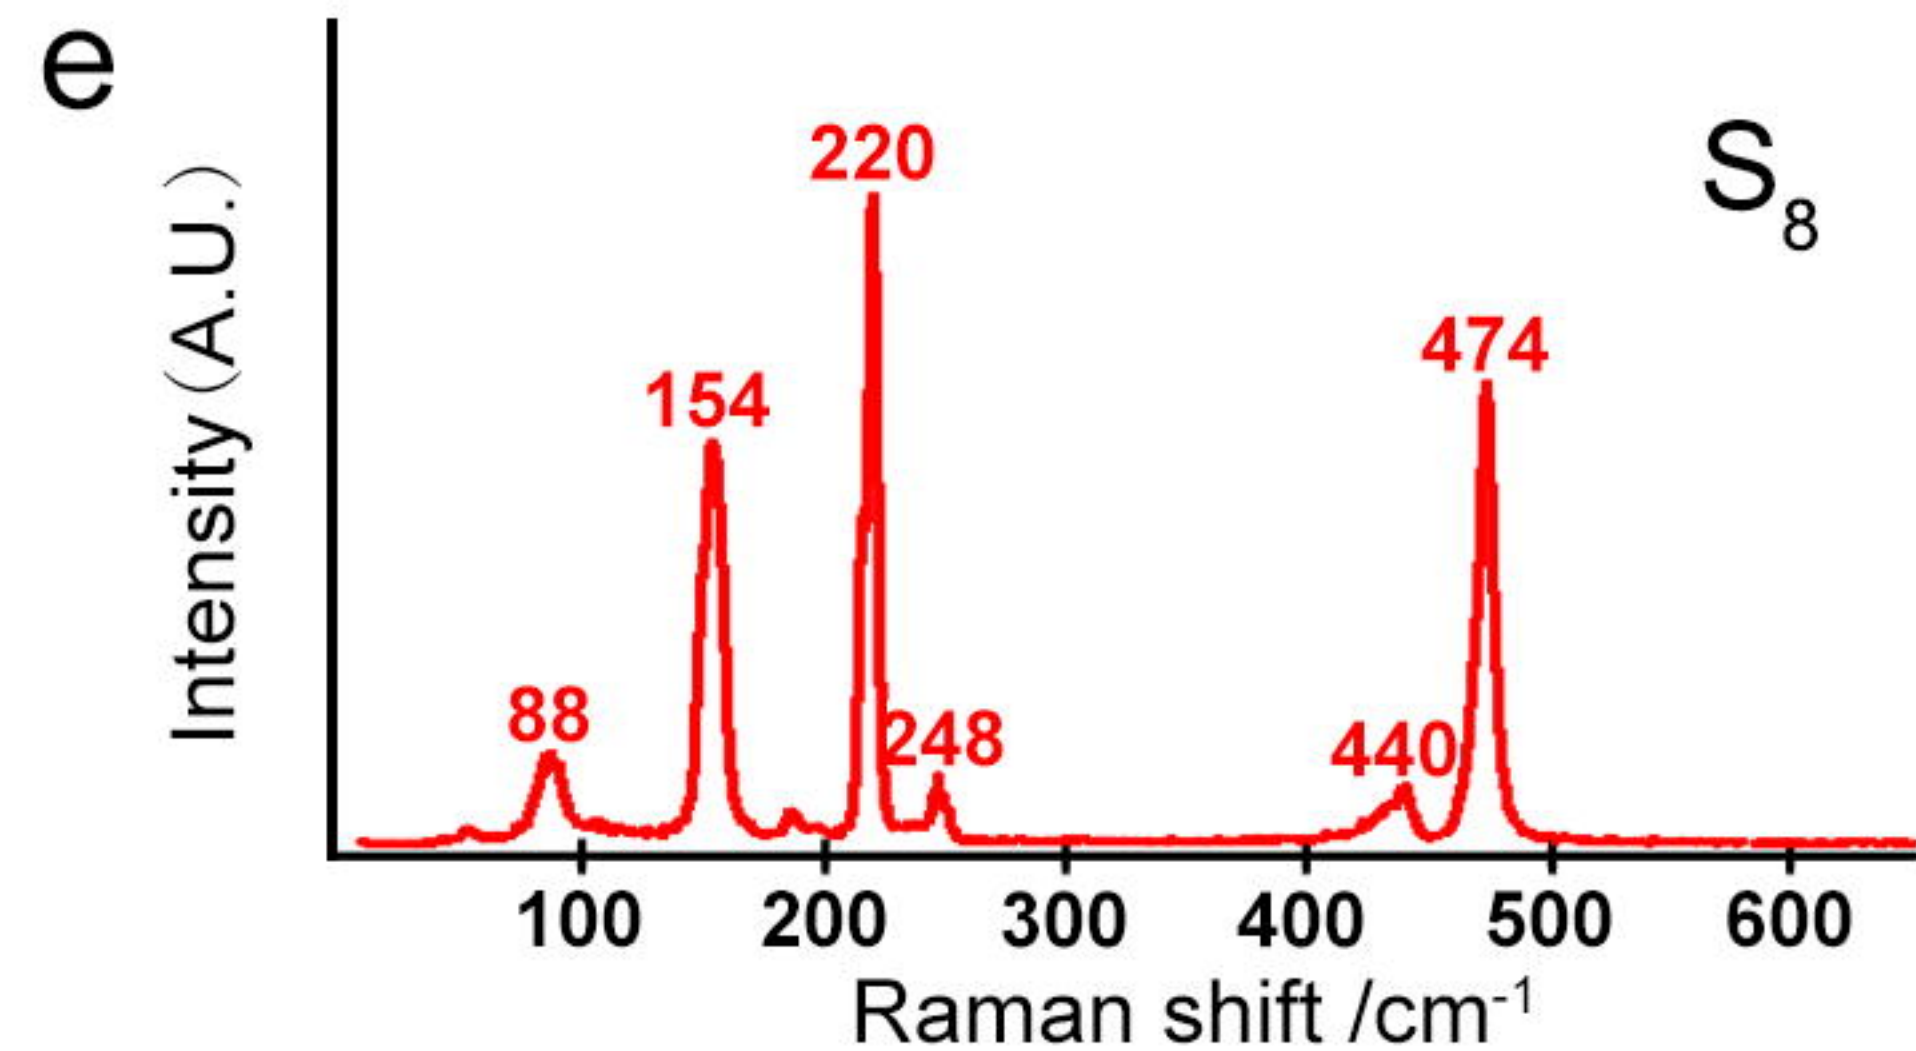



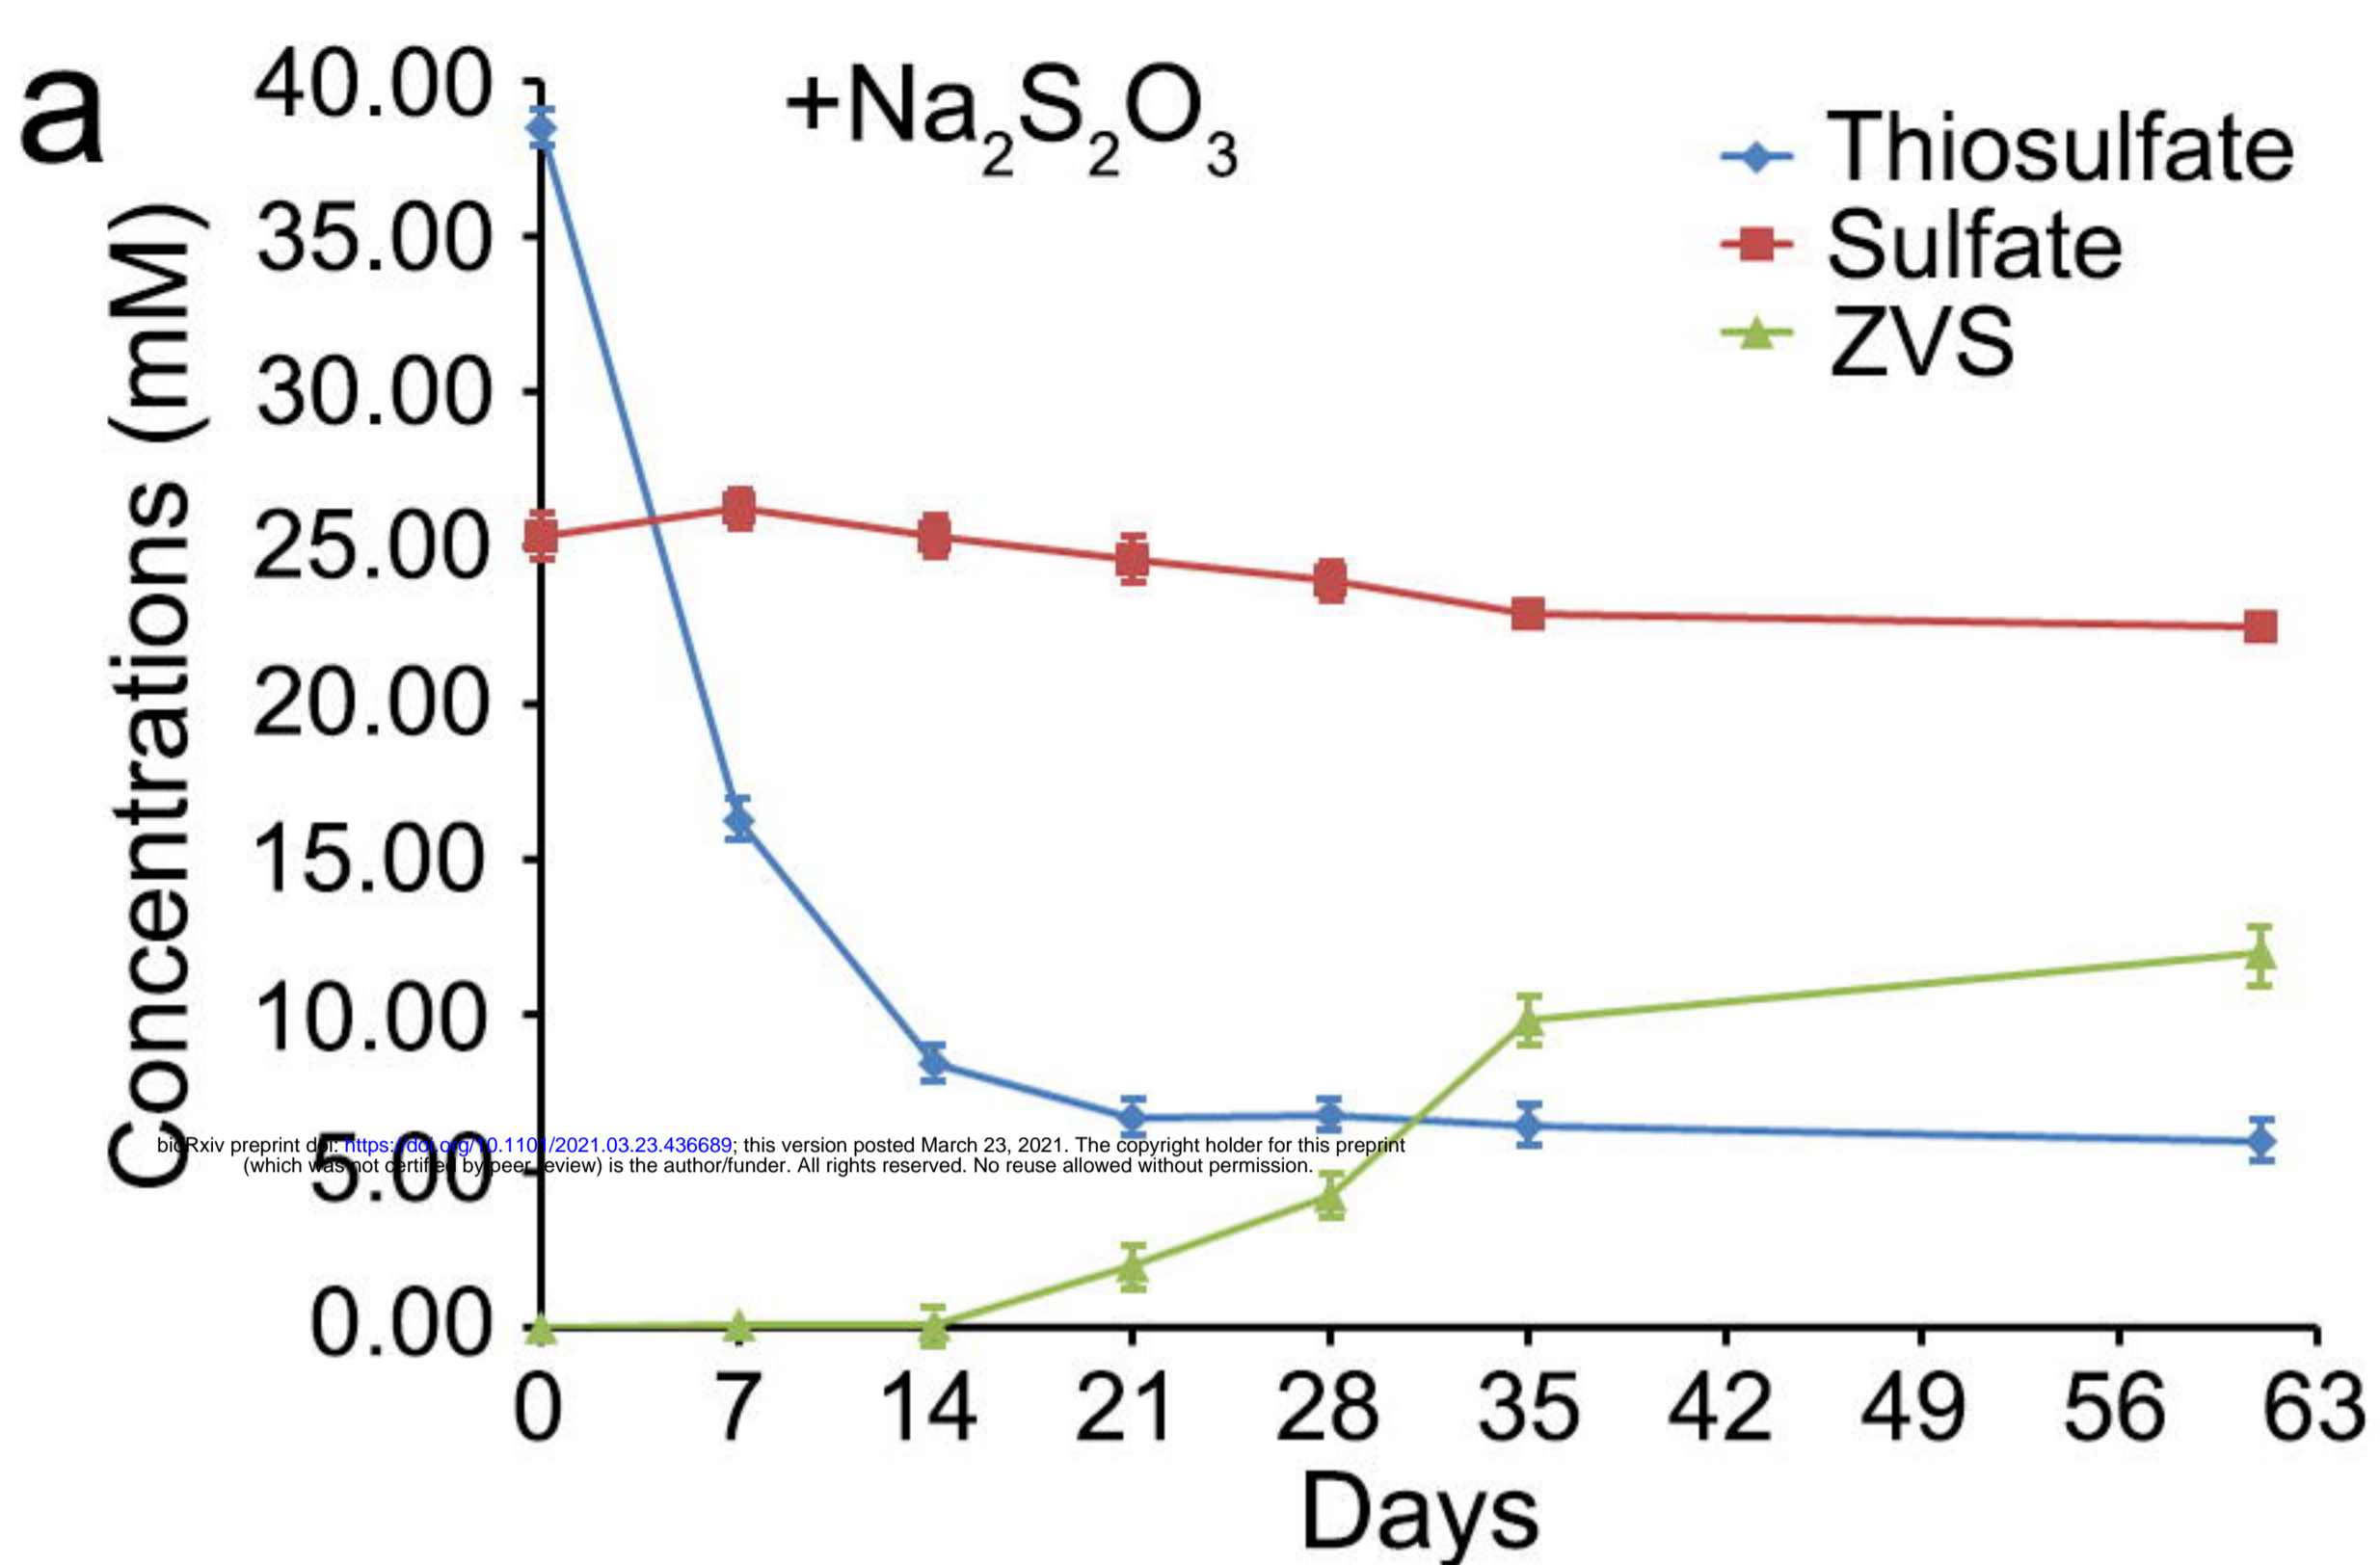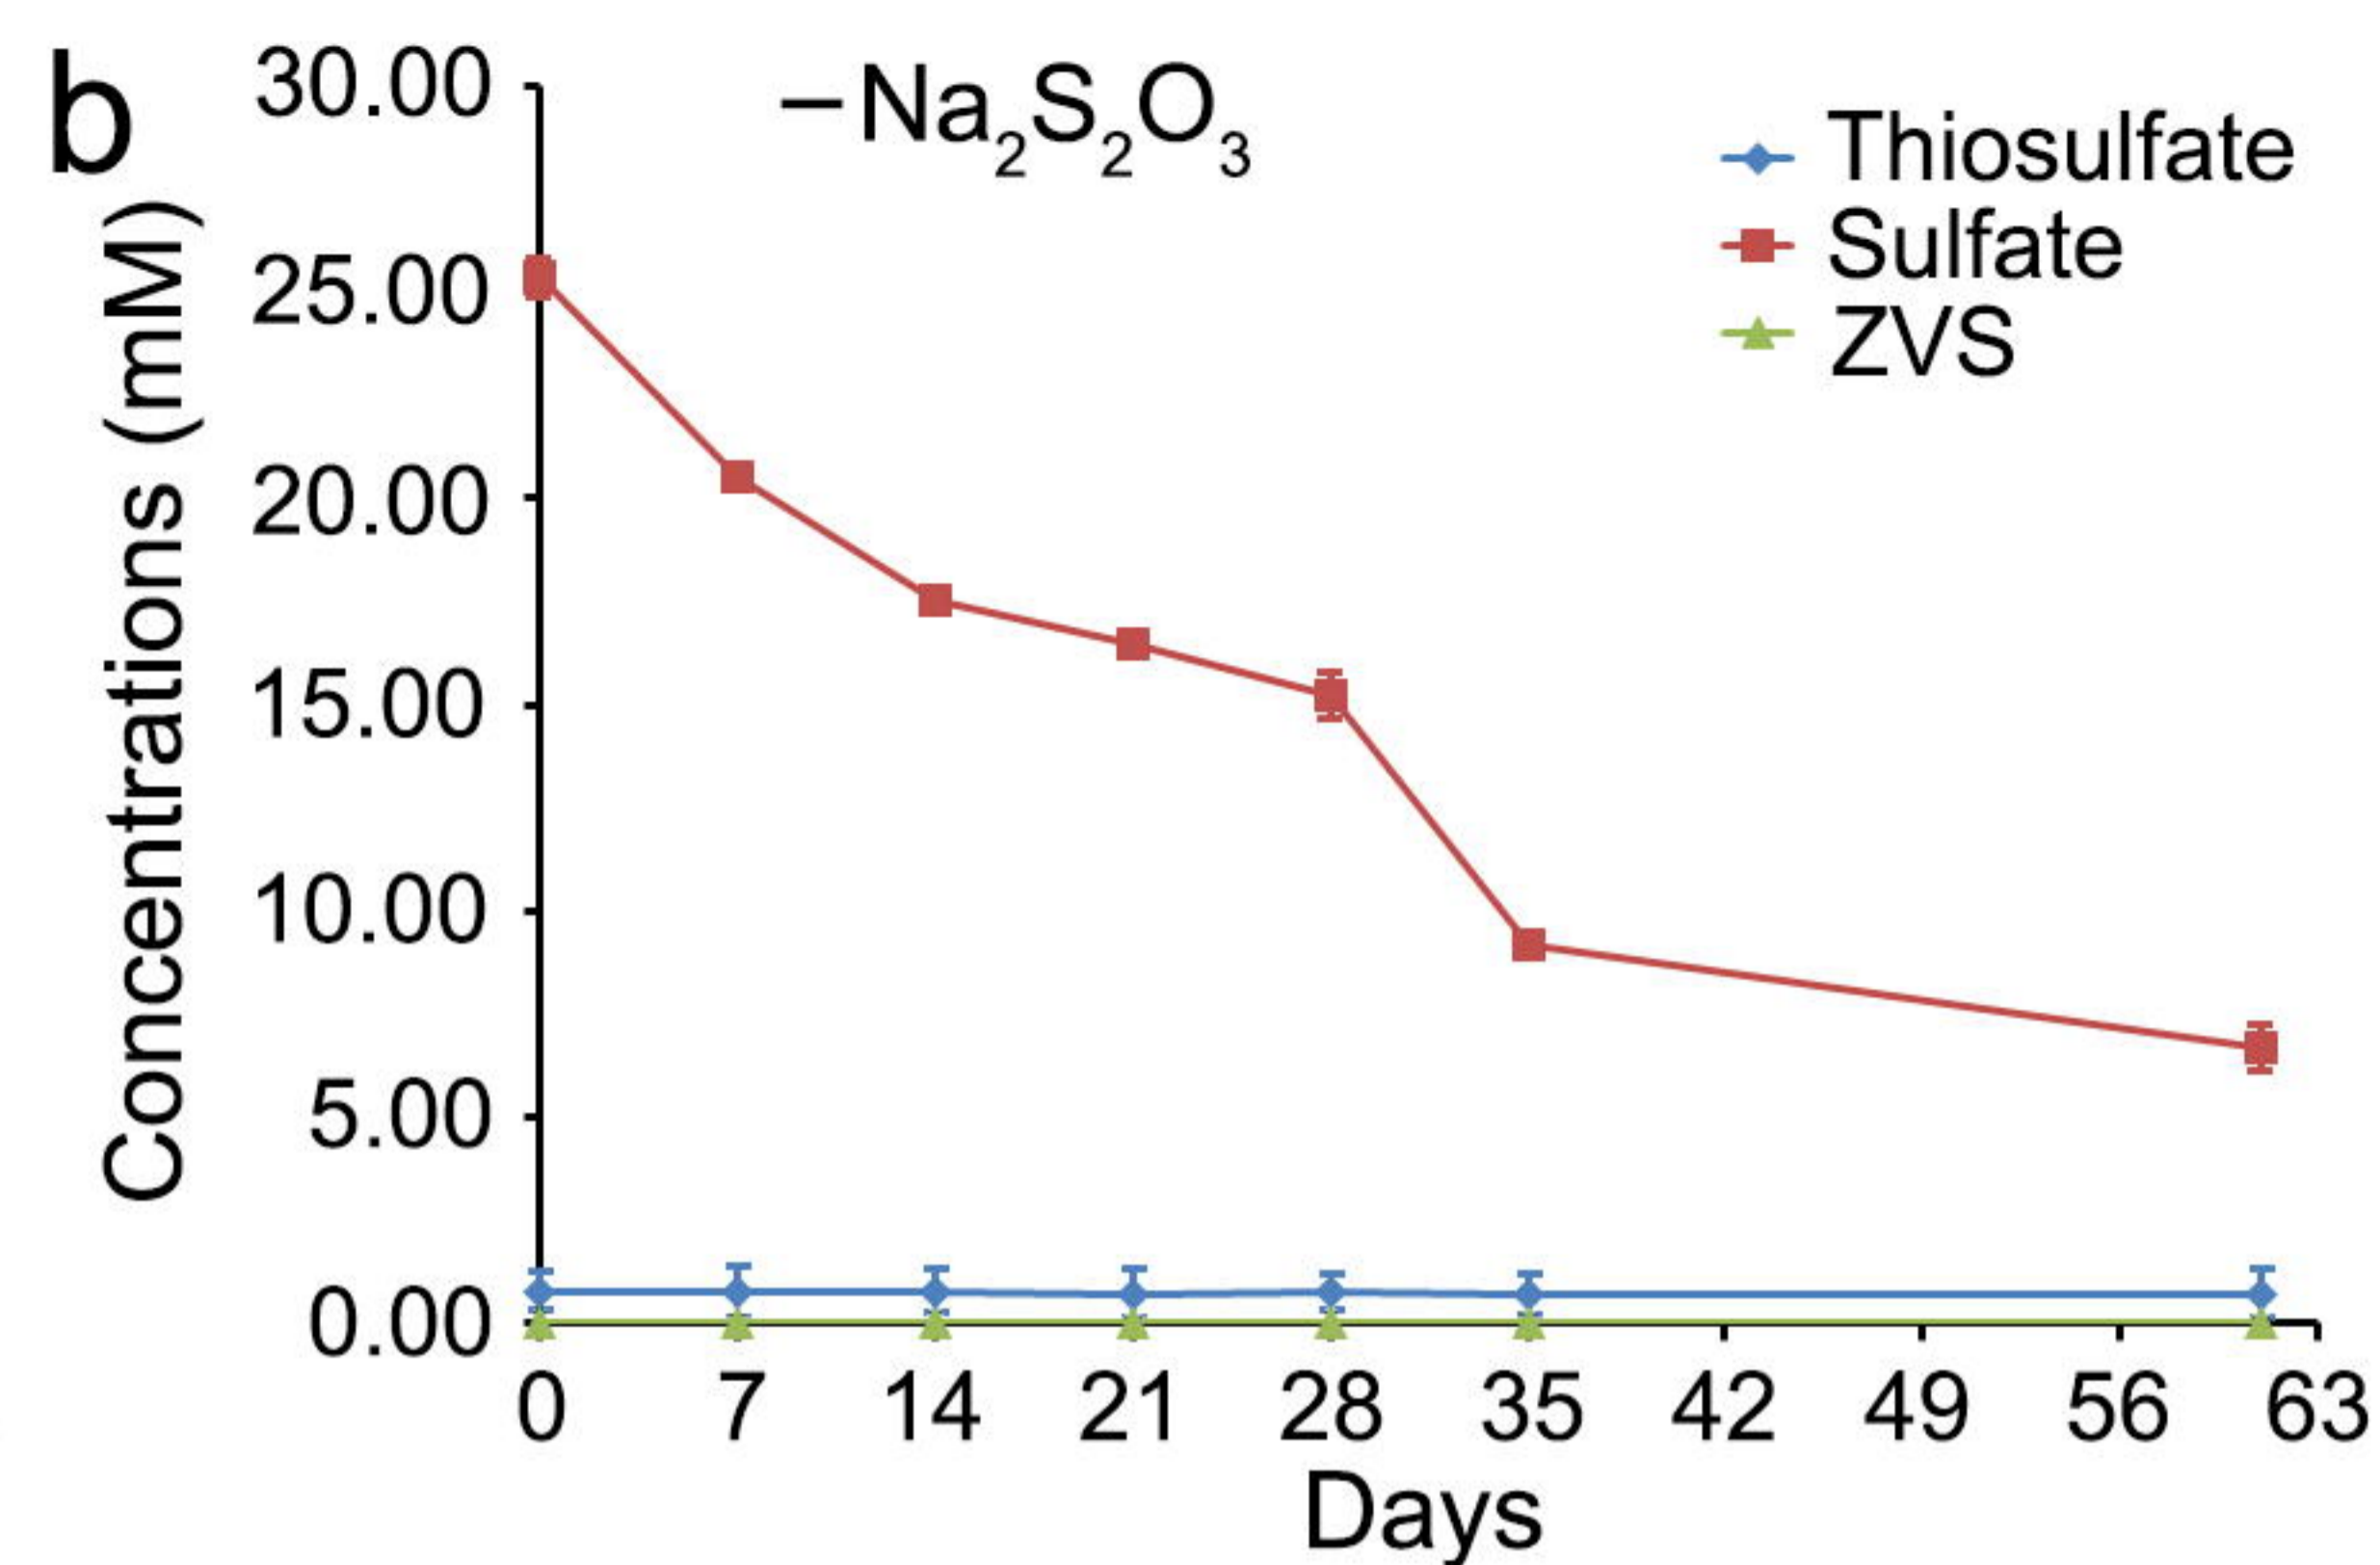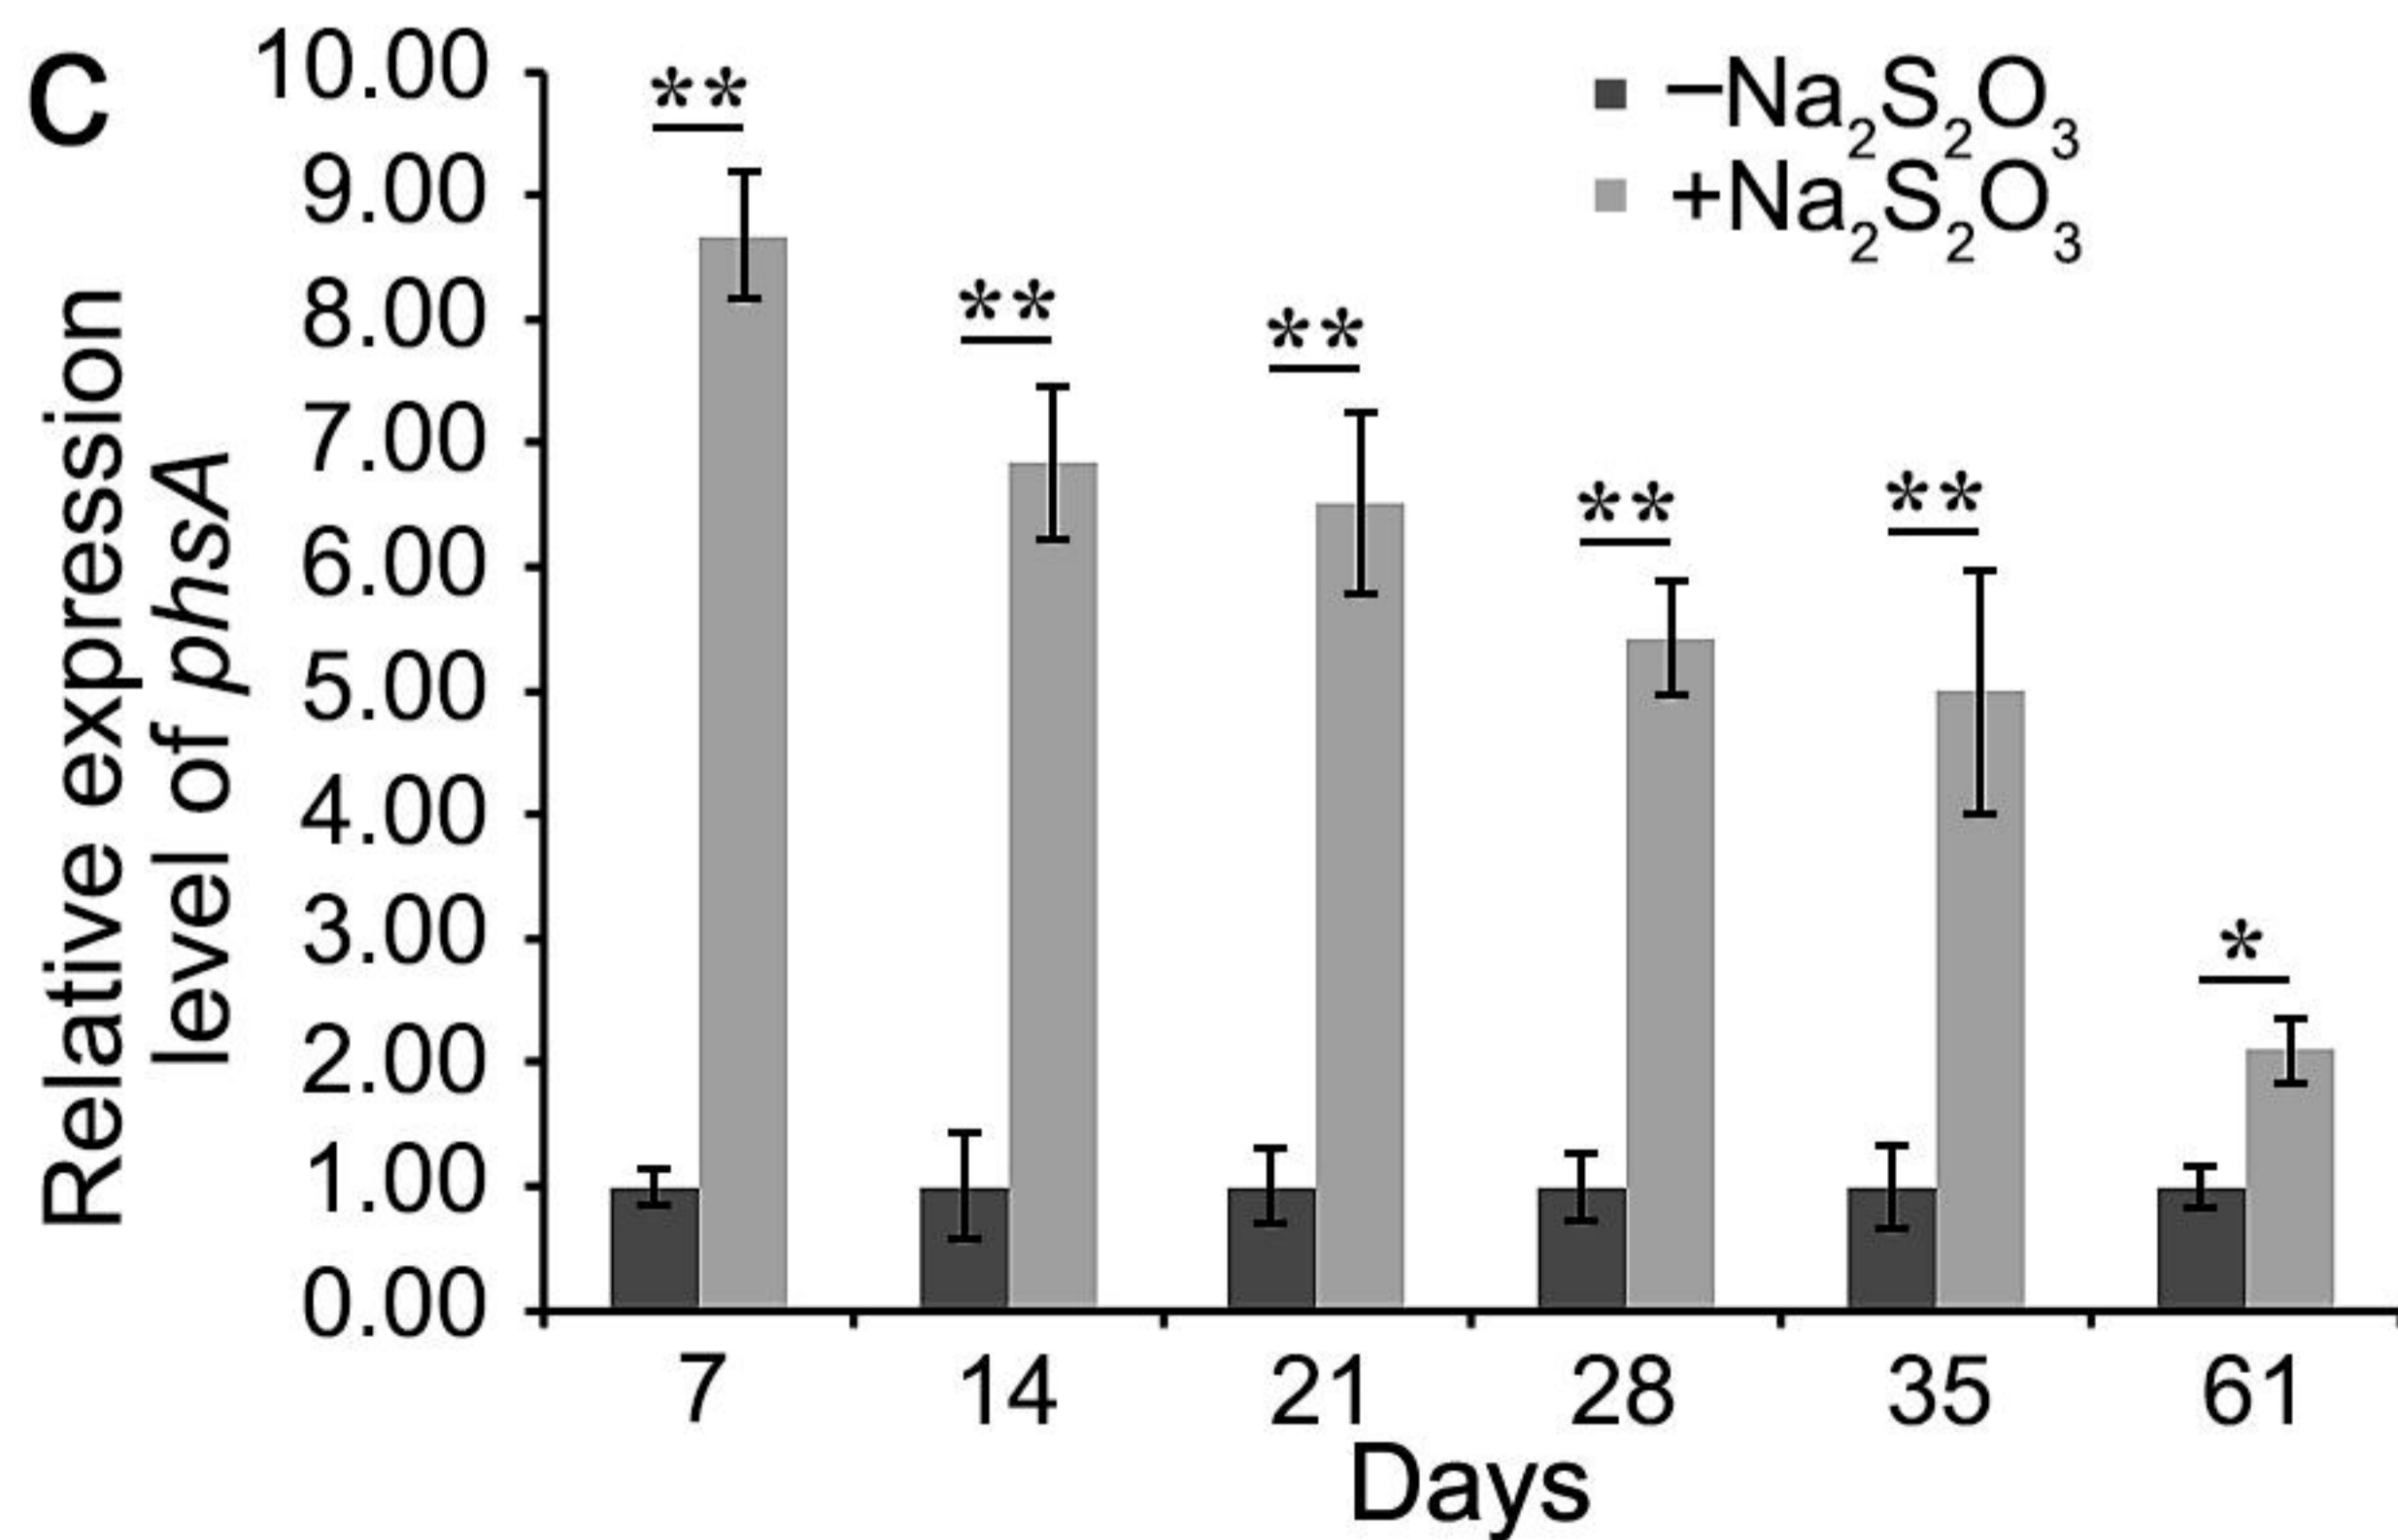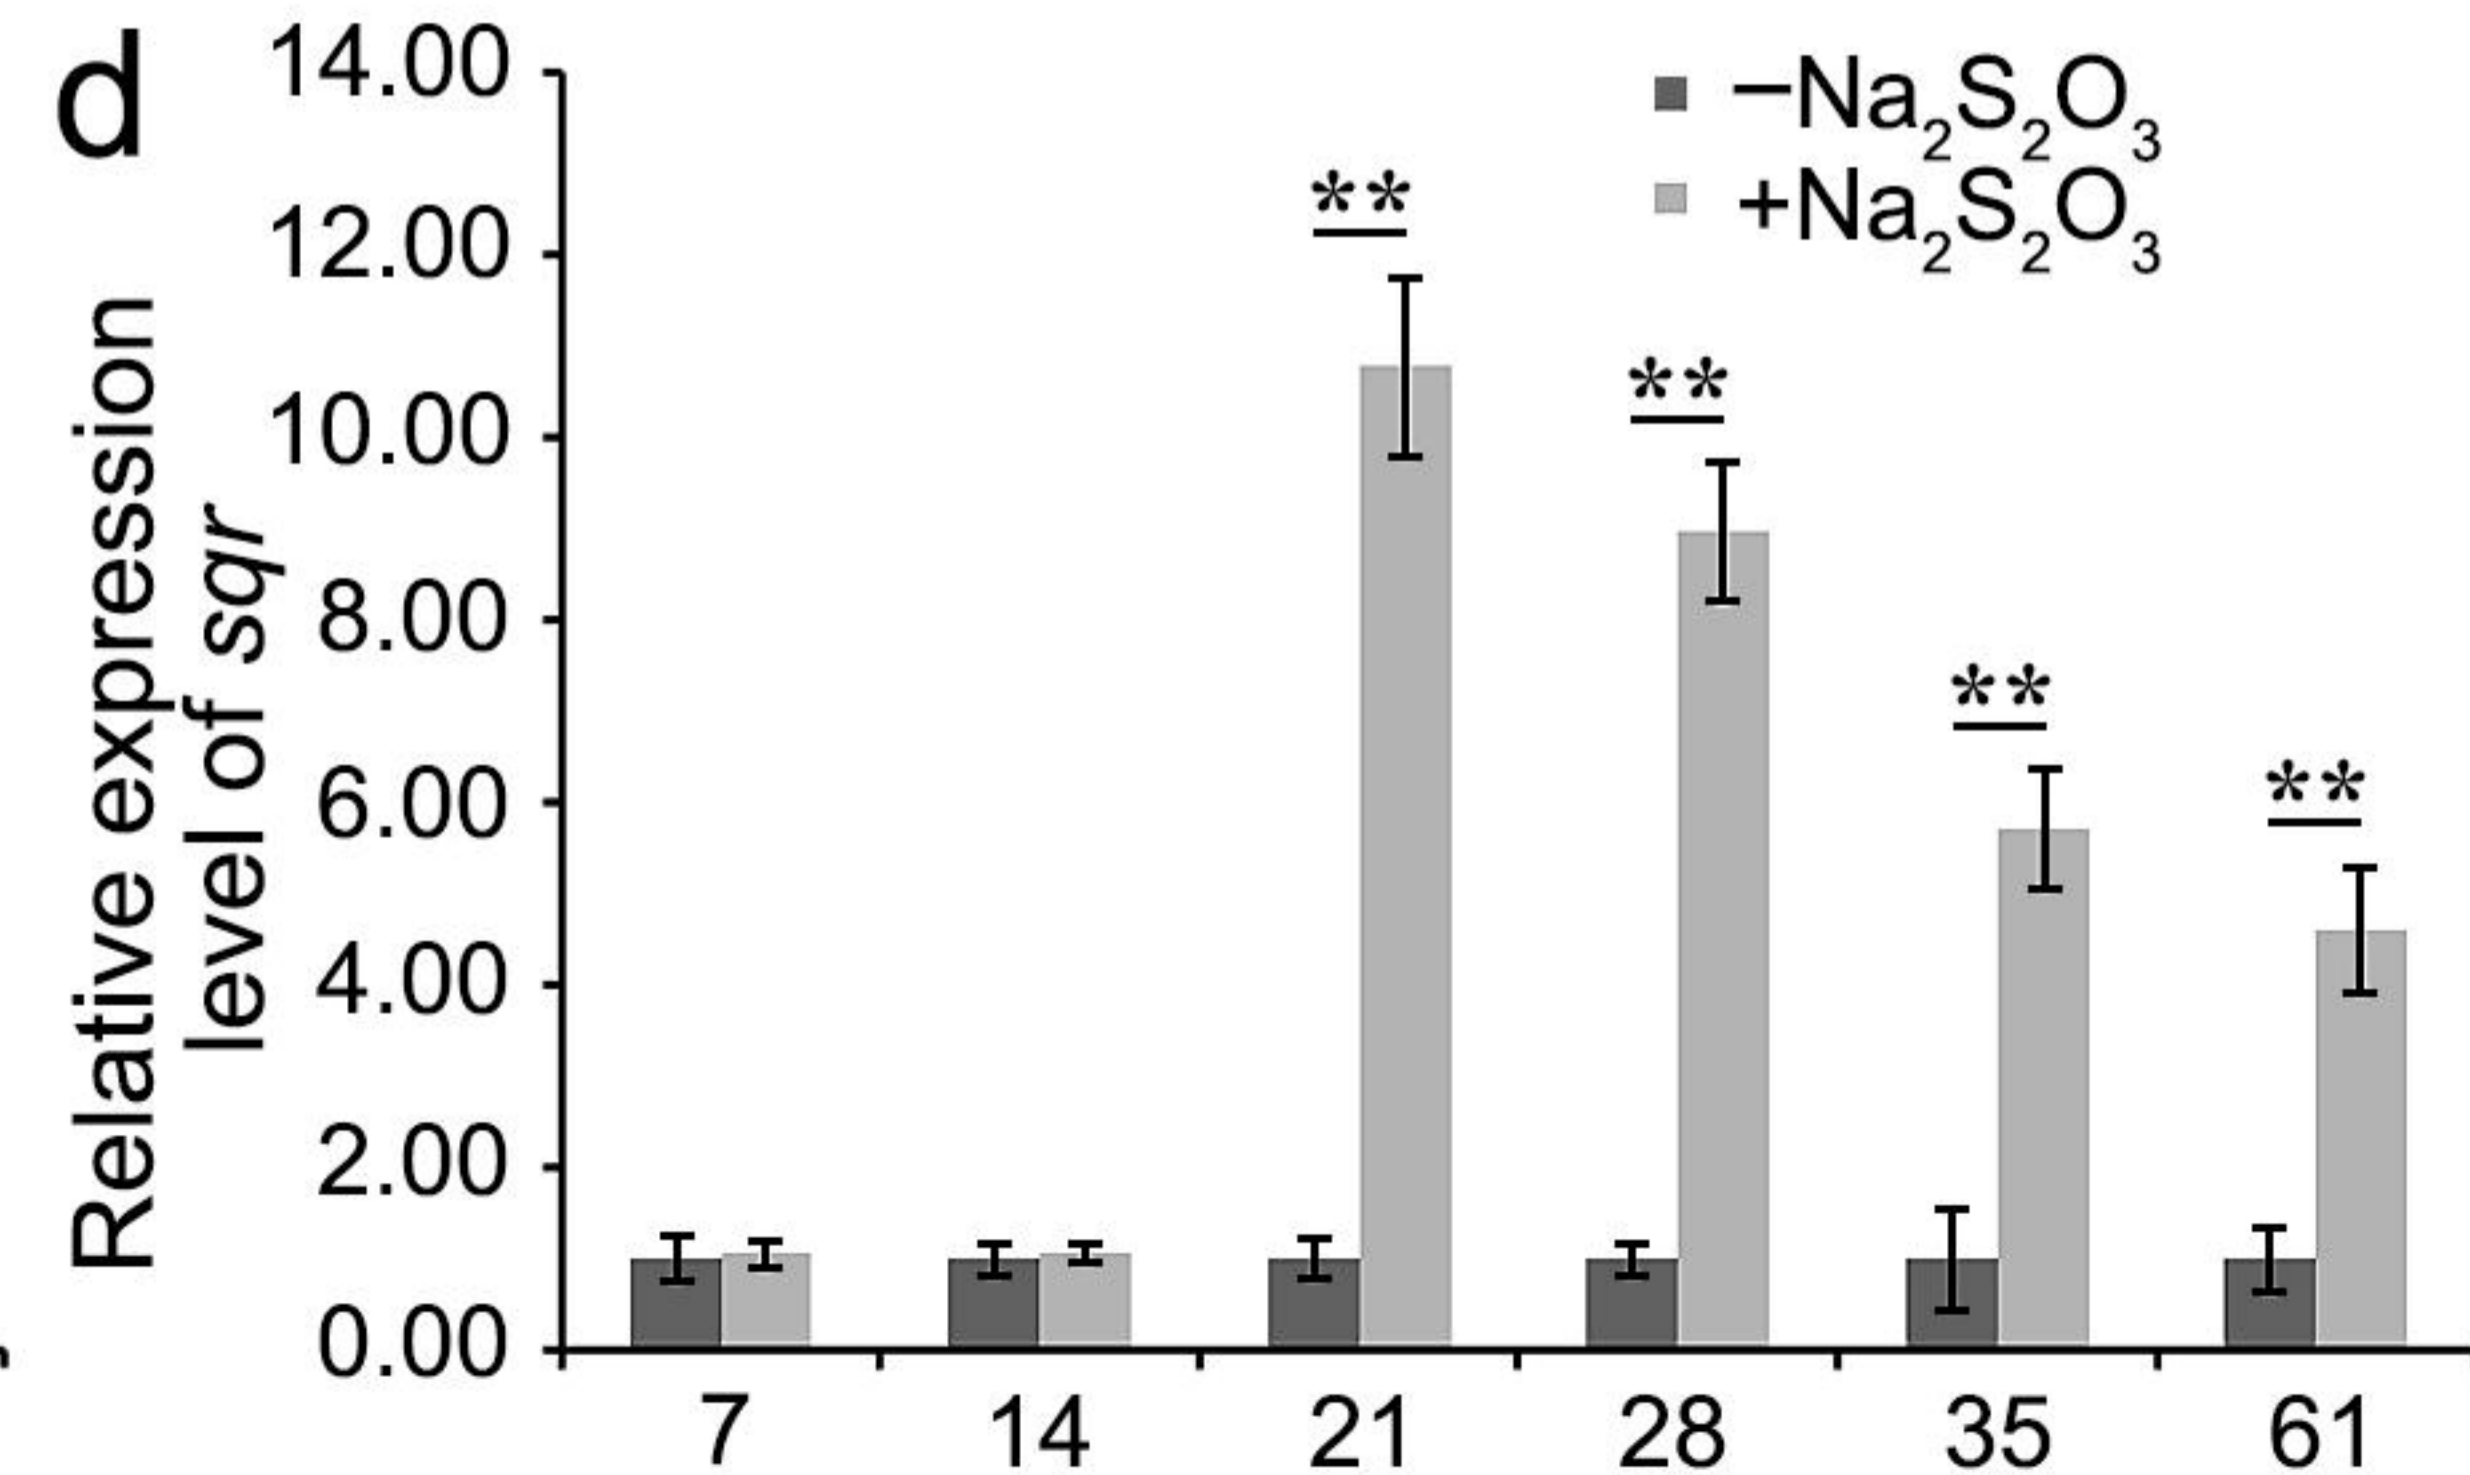



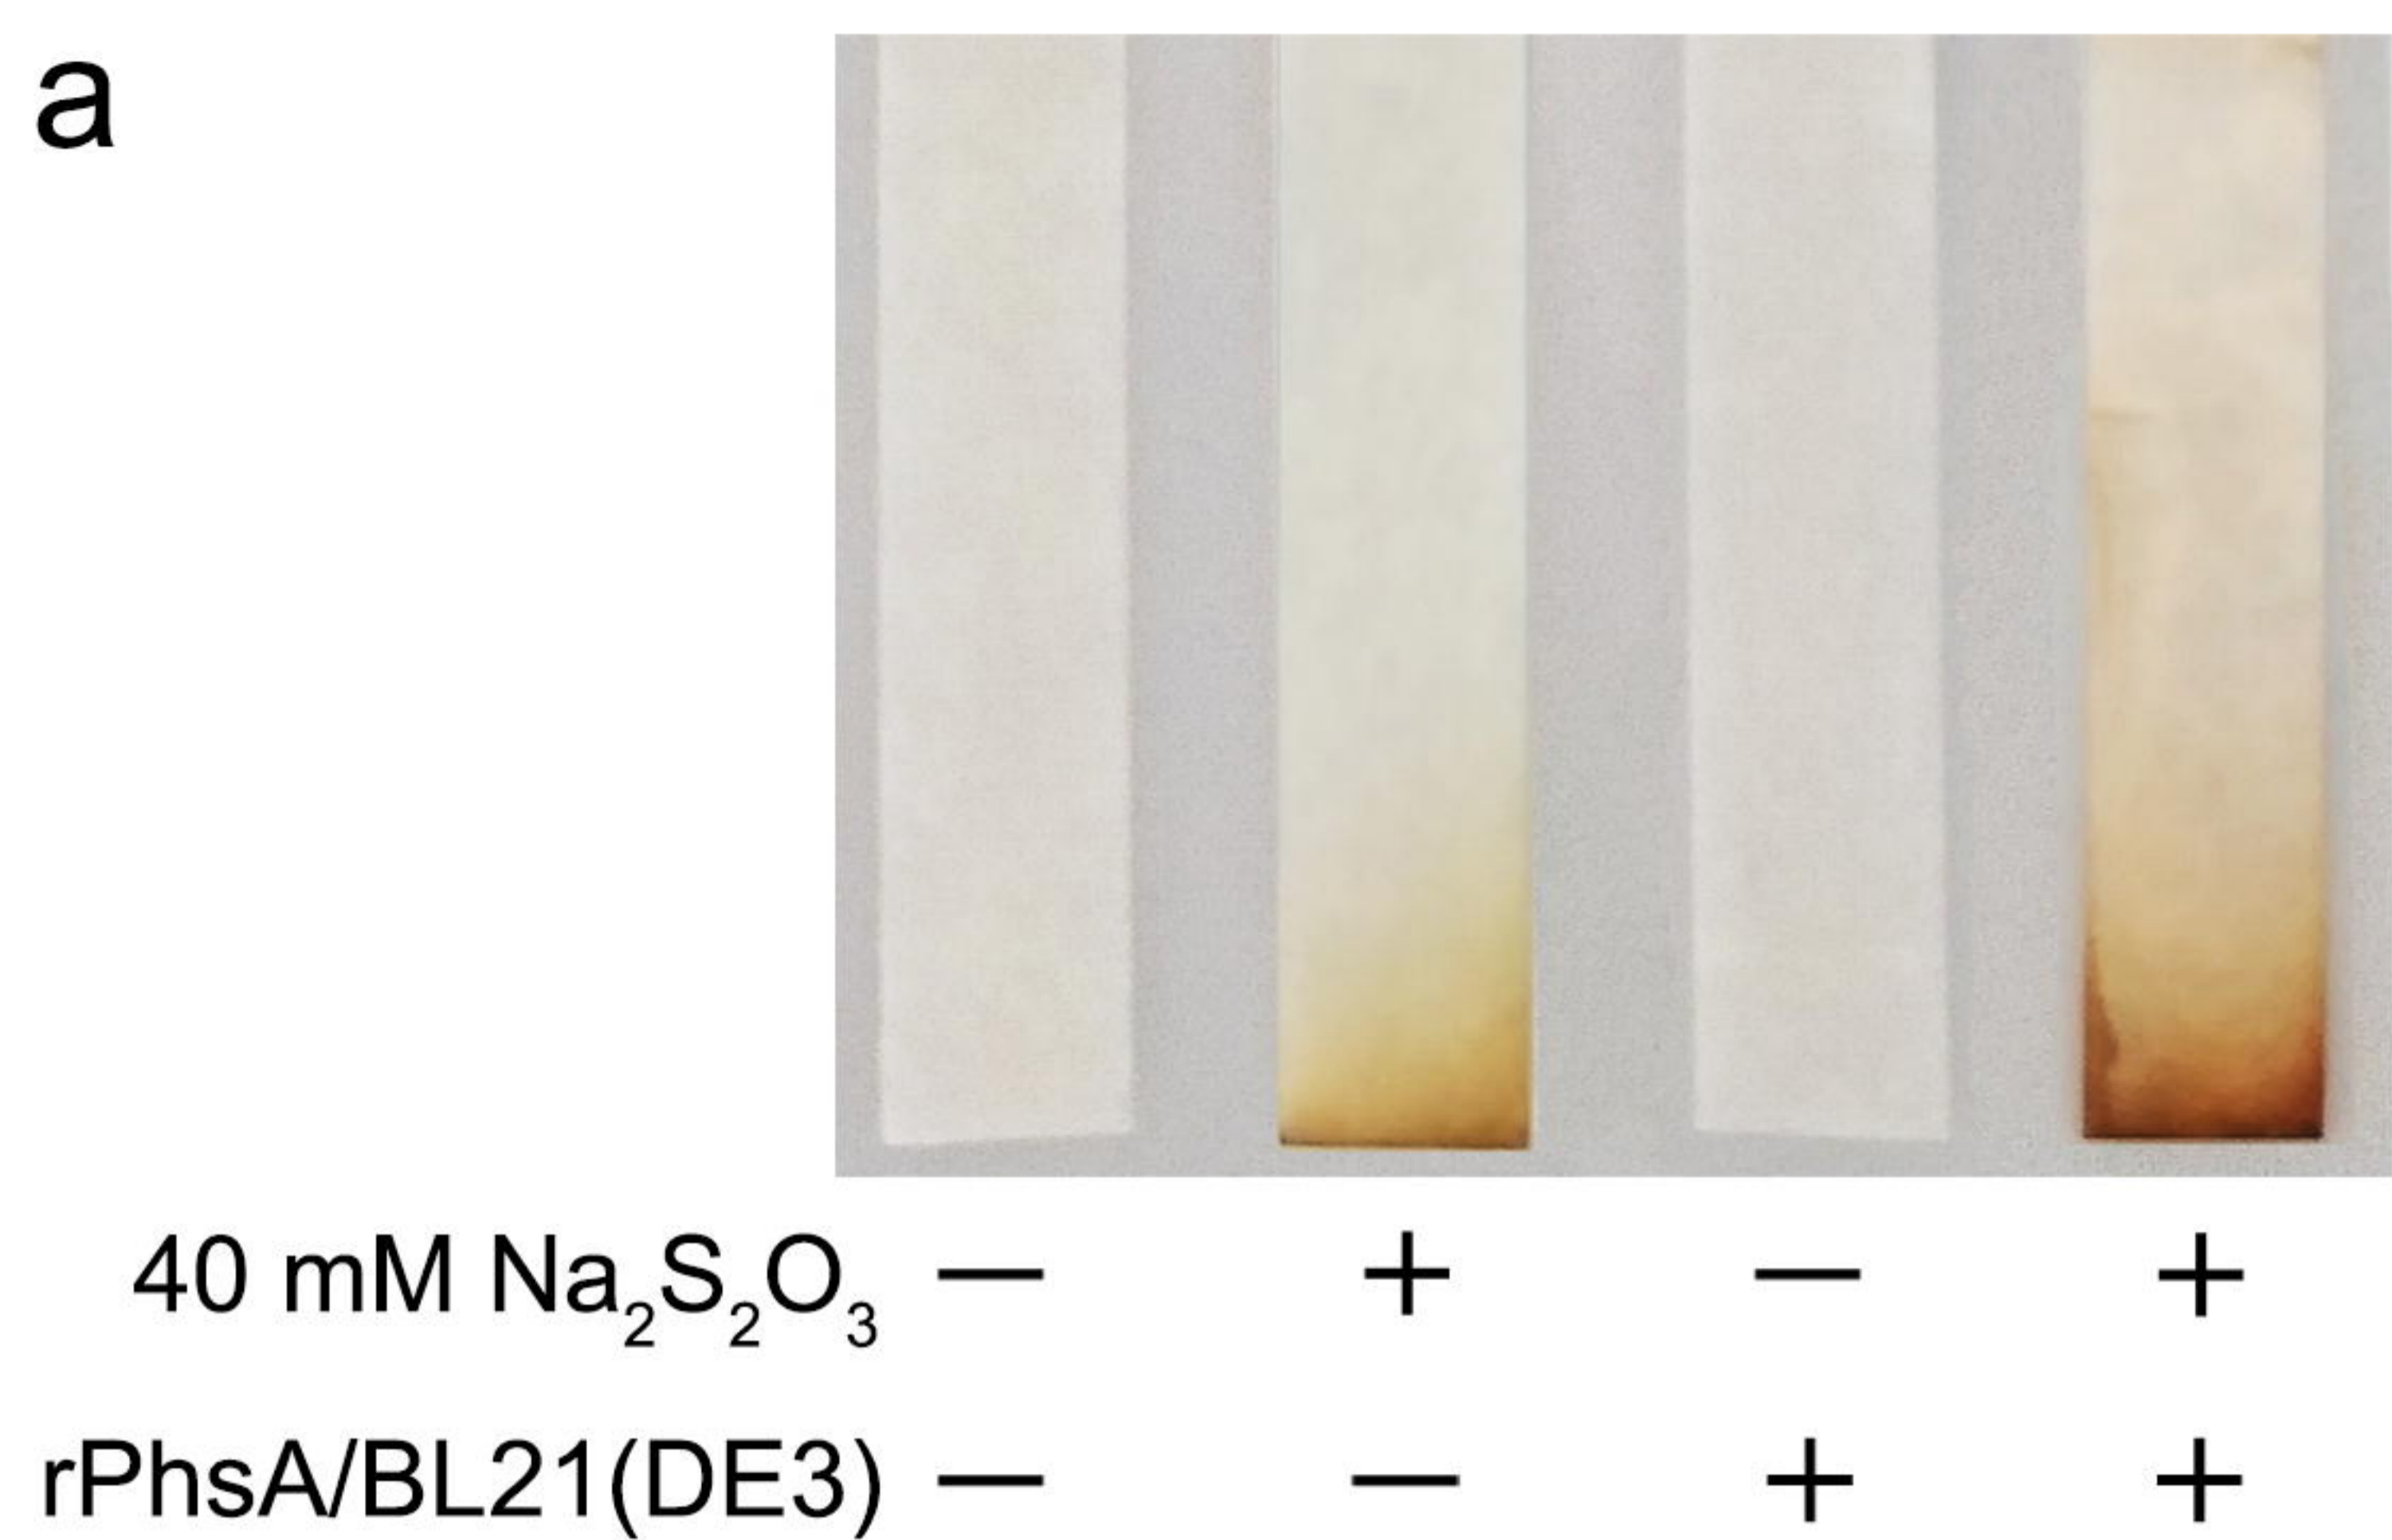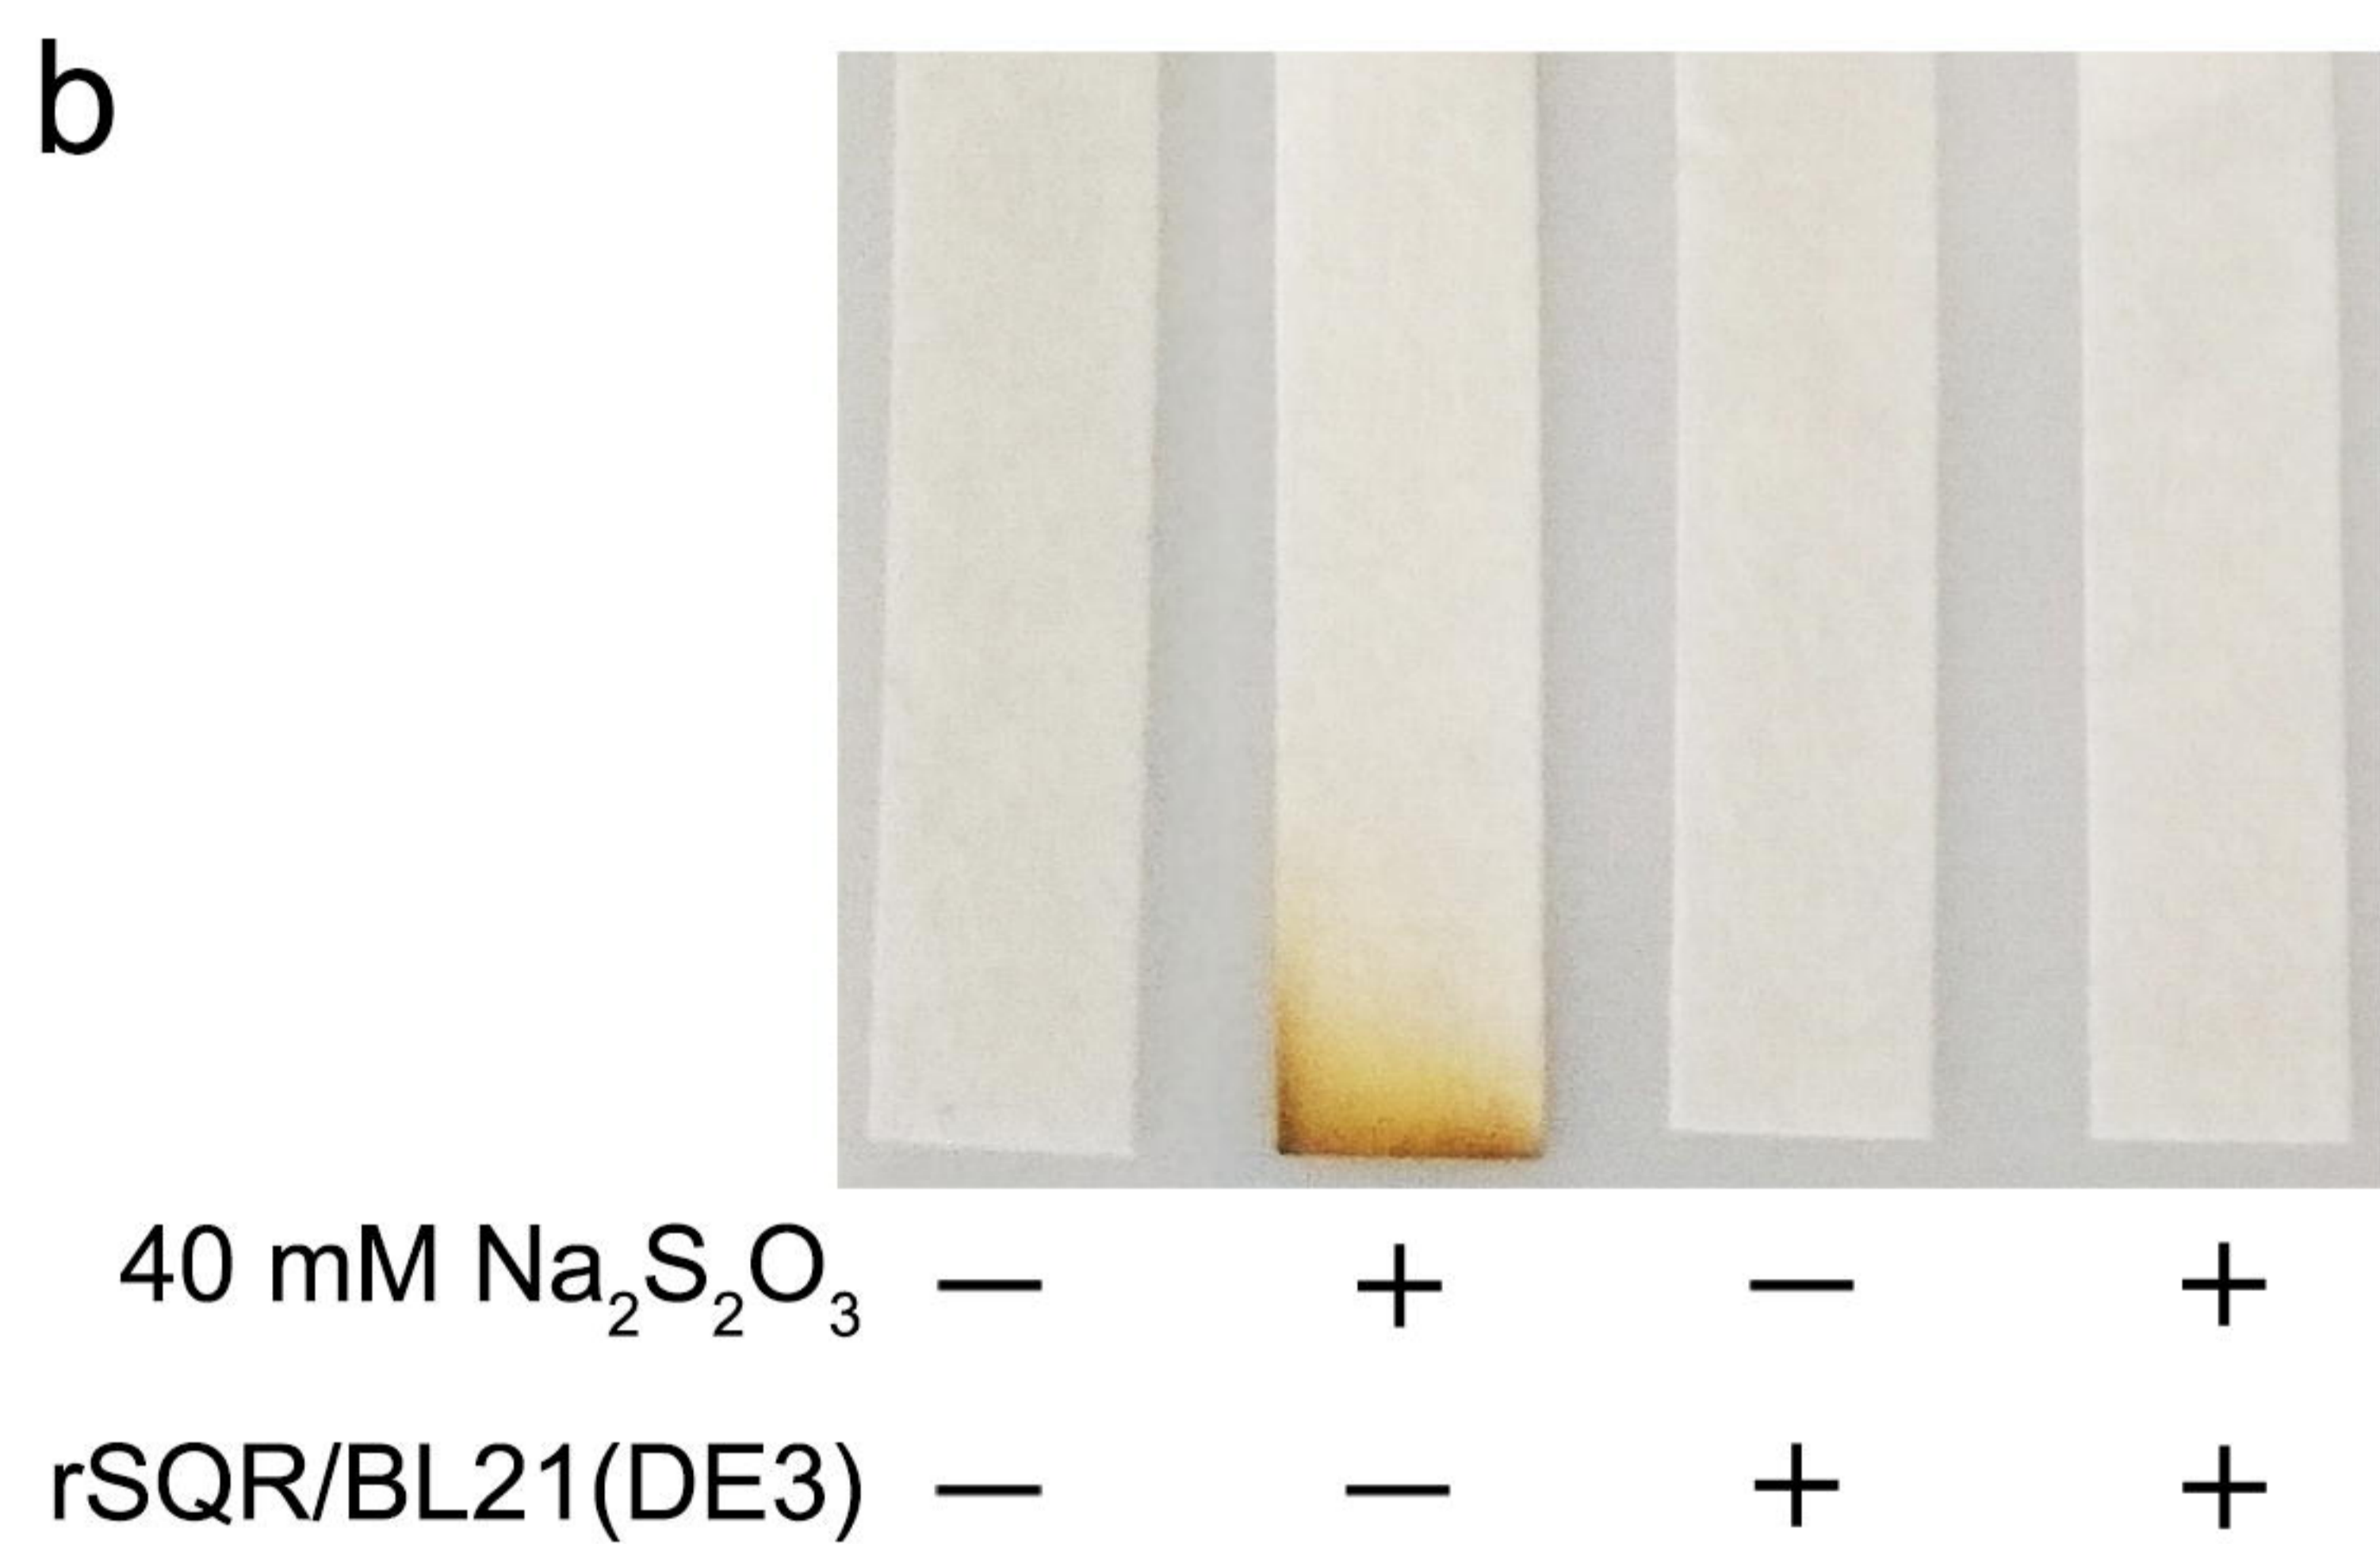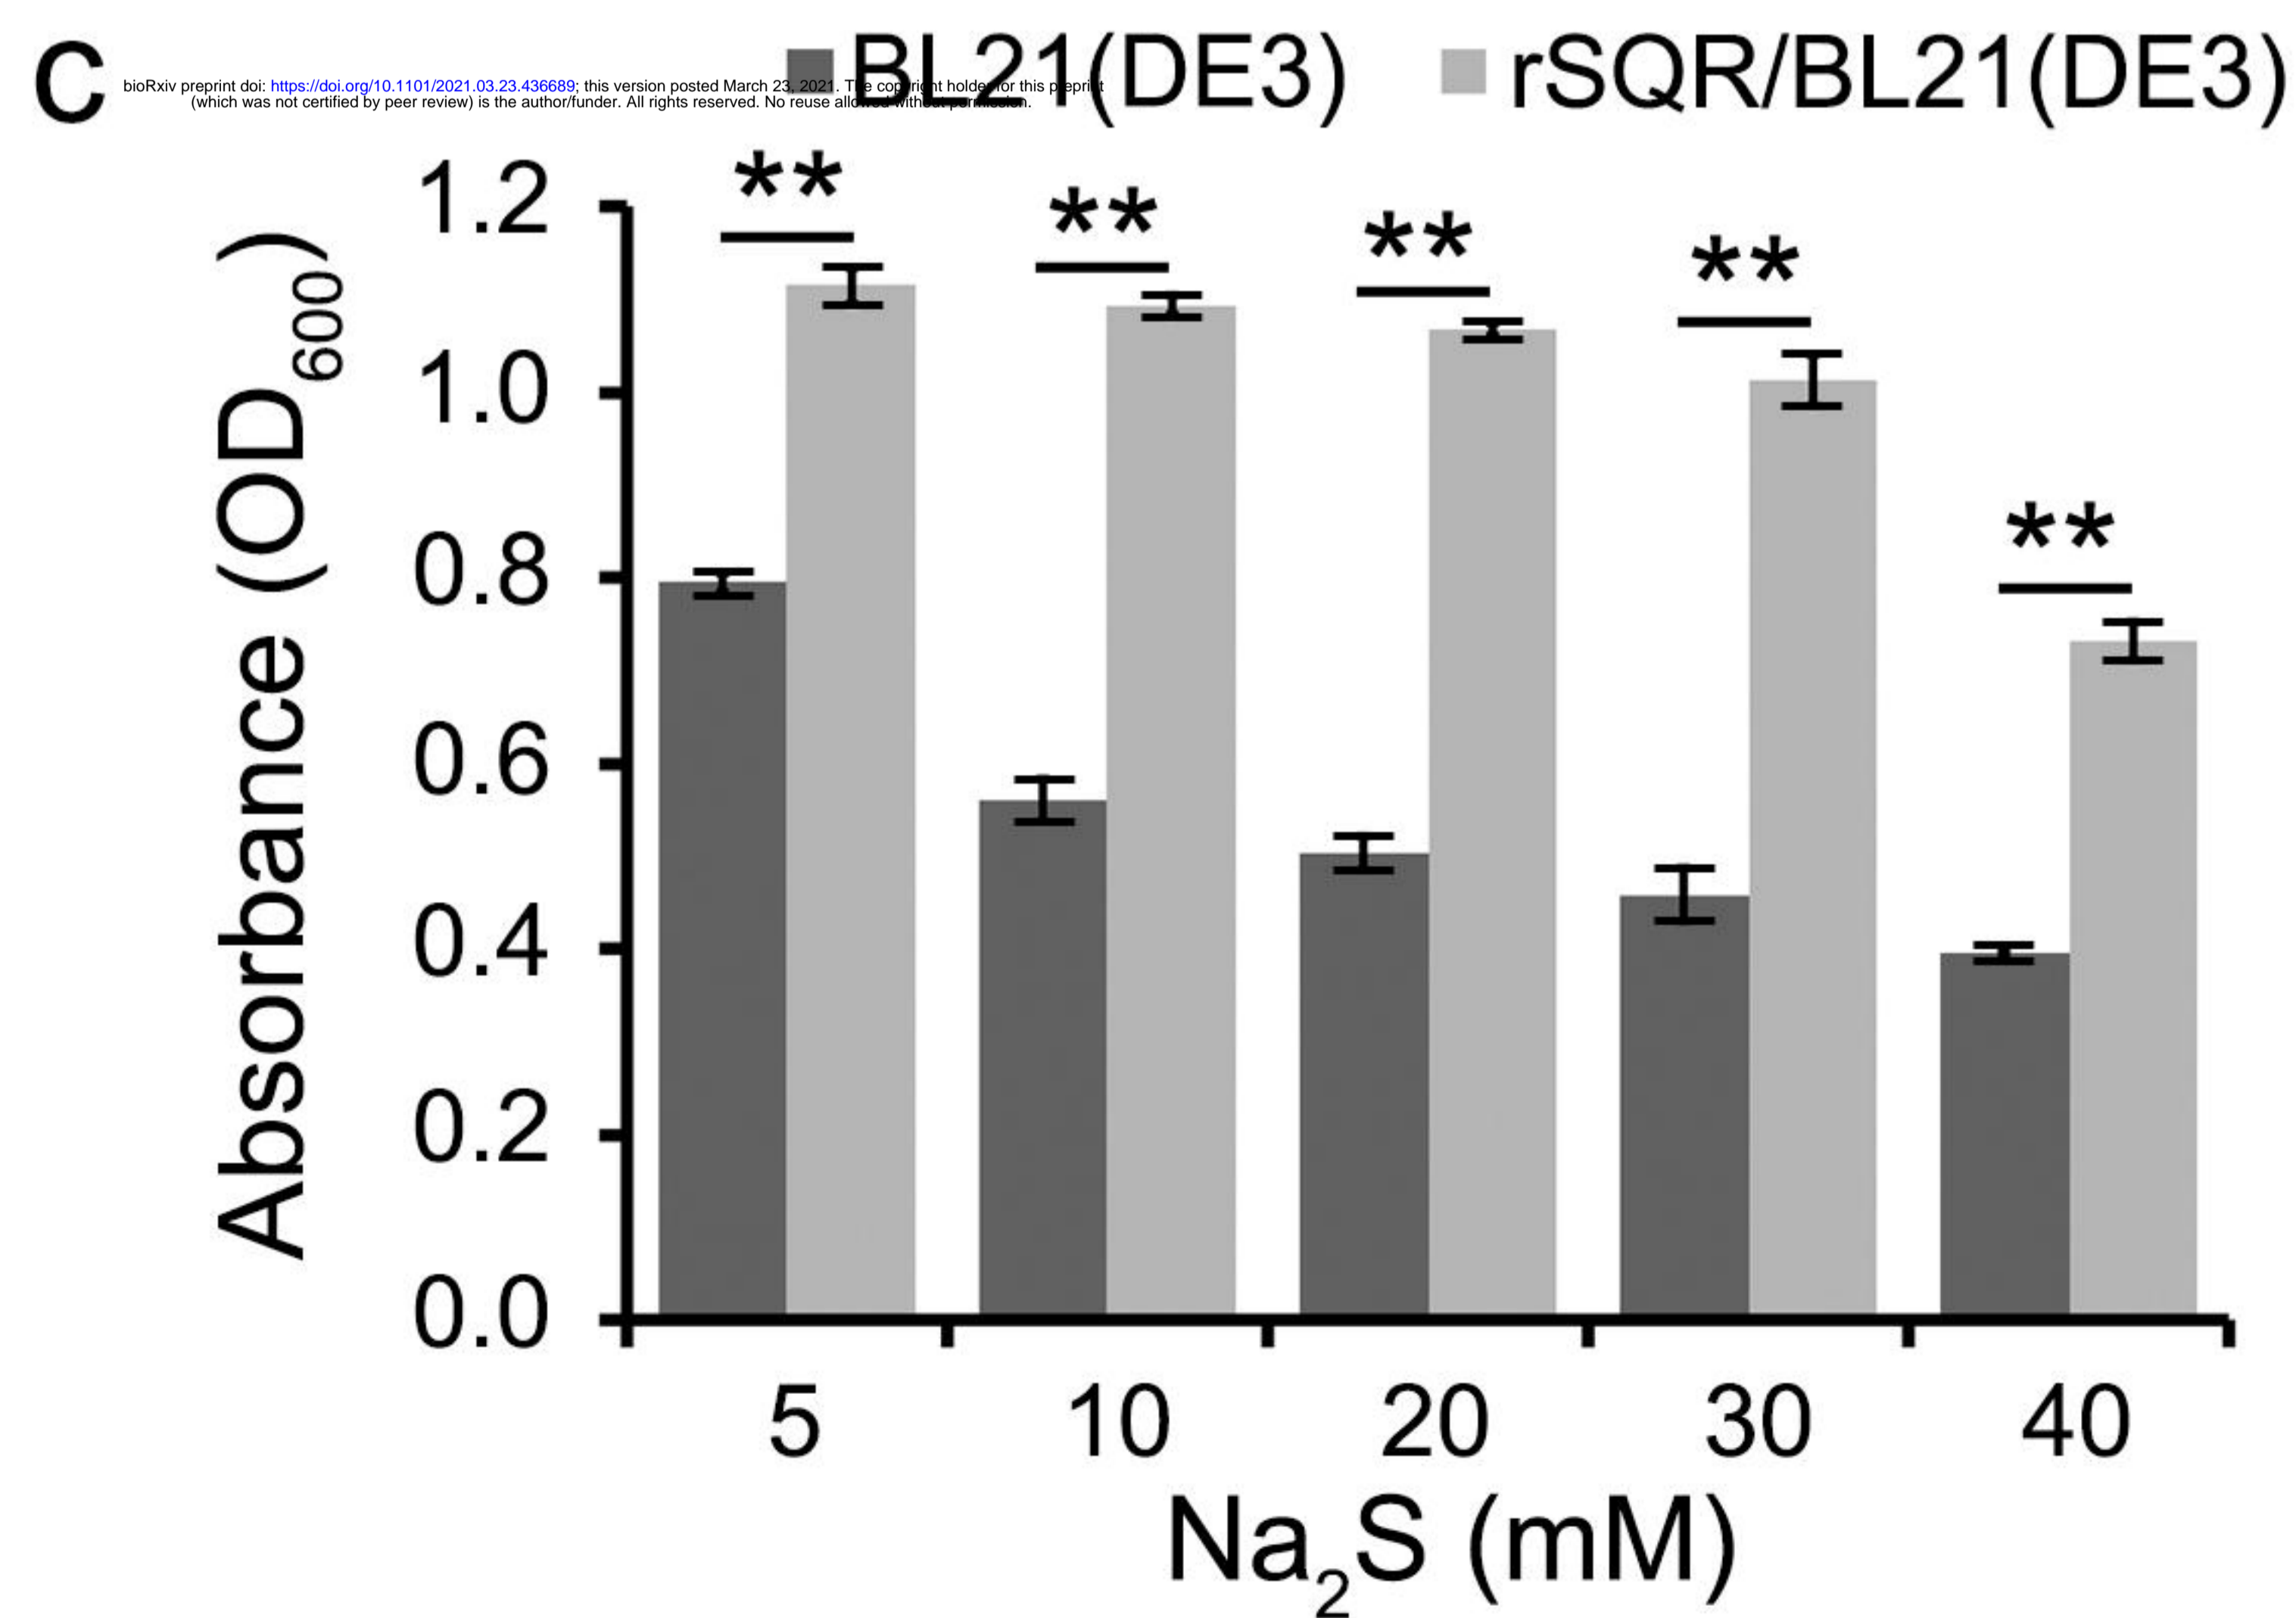



**a**

bioRxiv preprint doi: <https://doi.org/10.1101/2021.03.23.436689>; this version posted March 23, 2021. The copyright holder for this preprint (which was not certified by peer review) is the author/funder. All rights reserved. No reuse allowed without permission.

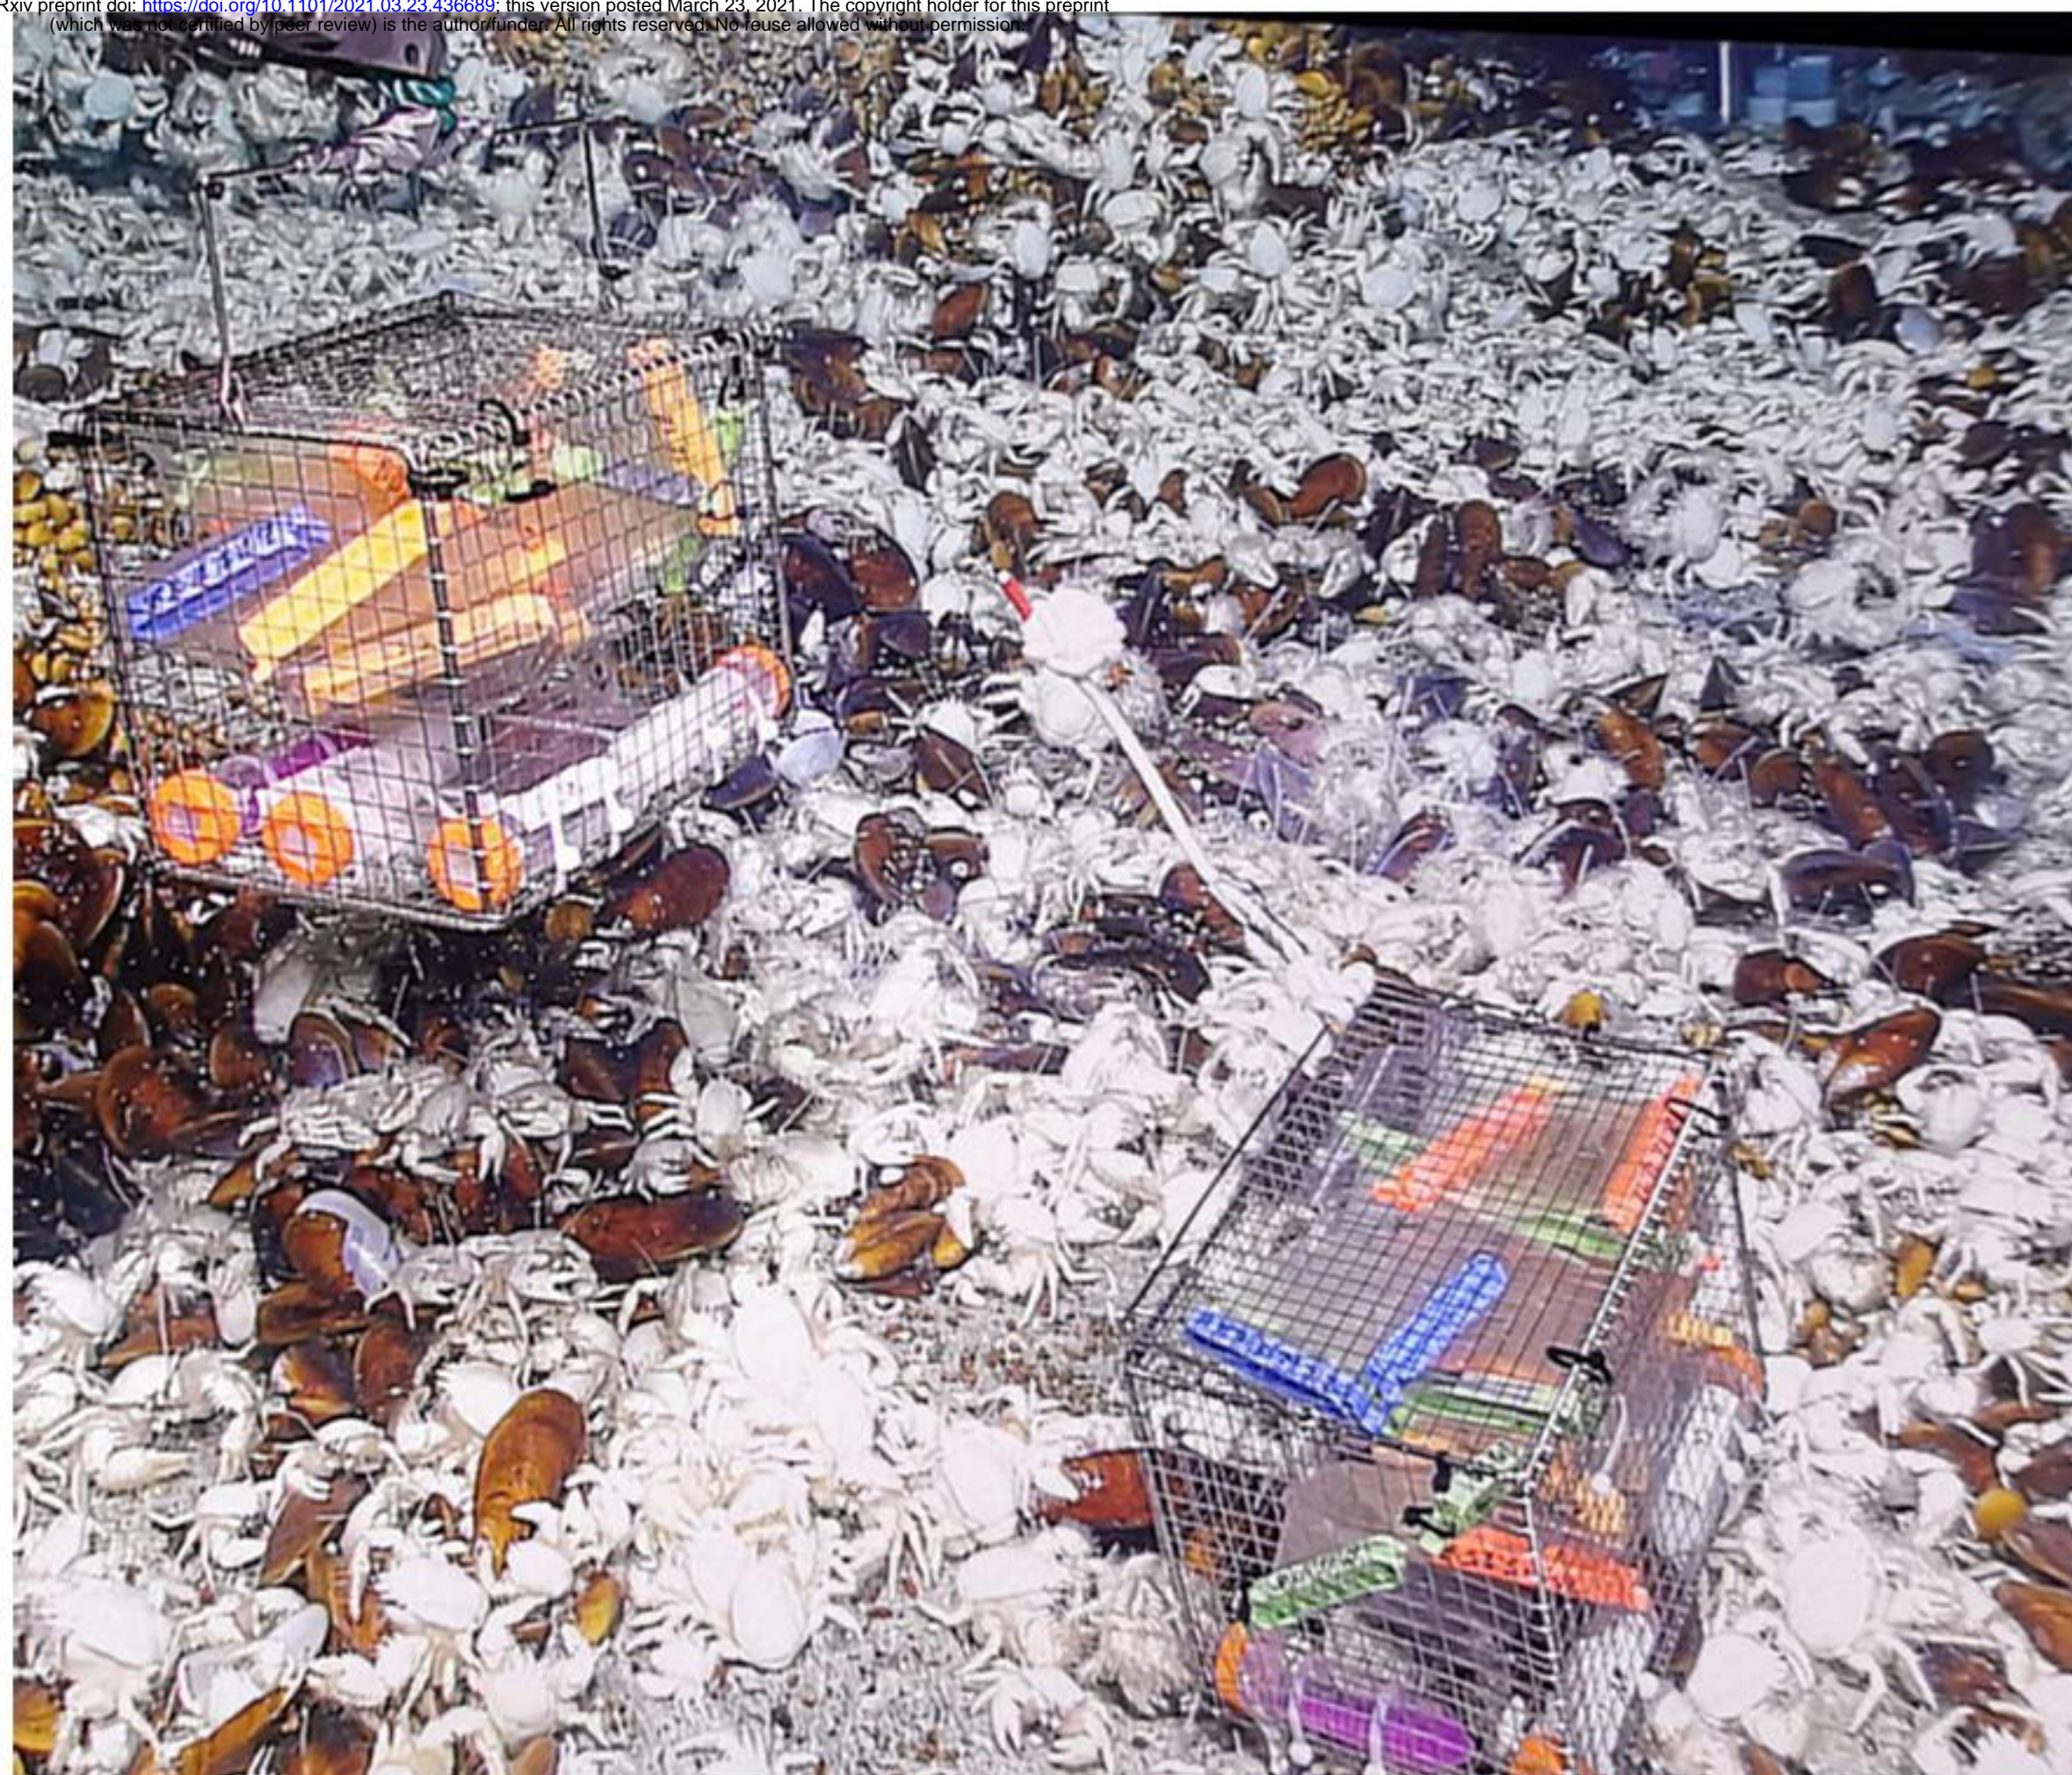**b**

|                         | In situ | Lab condition |
|-------------------------|---------|---------------|
| QmoA (E8L03_09645)      | 1.23    | 1.00          |
| QmoB (E8L03_09640)      | 1.24    | 1.00          |
| QmoC (E8L03_09635)      | 1.71    | 1.00          |
| AprA (E8L03_09650)      | 1.28    | 1.00          |
| AprB (E8L03_09655)      | 1.32    | 1.00          |
| Sat (E8L03_09660)       | 1.32    | 1.00          |
| CysQ (E8L03_10175)      | 1.95    | 1.00          |
| DmsB (E8L03_06390)      | 1.39    | 1.00          |
| SQR (E8L03_05425)       | 4.15    | 1.00          |
| PhsA (E8L03_05425)      | 1.63    | 1.00          |
| SsuA (E8L03_10790)      | 1.23    | 1.00          |
| DsyB-like (E8L03_02130) | 1.36    | 1.00          |



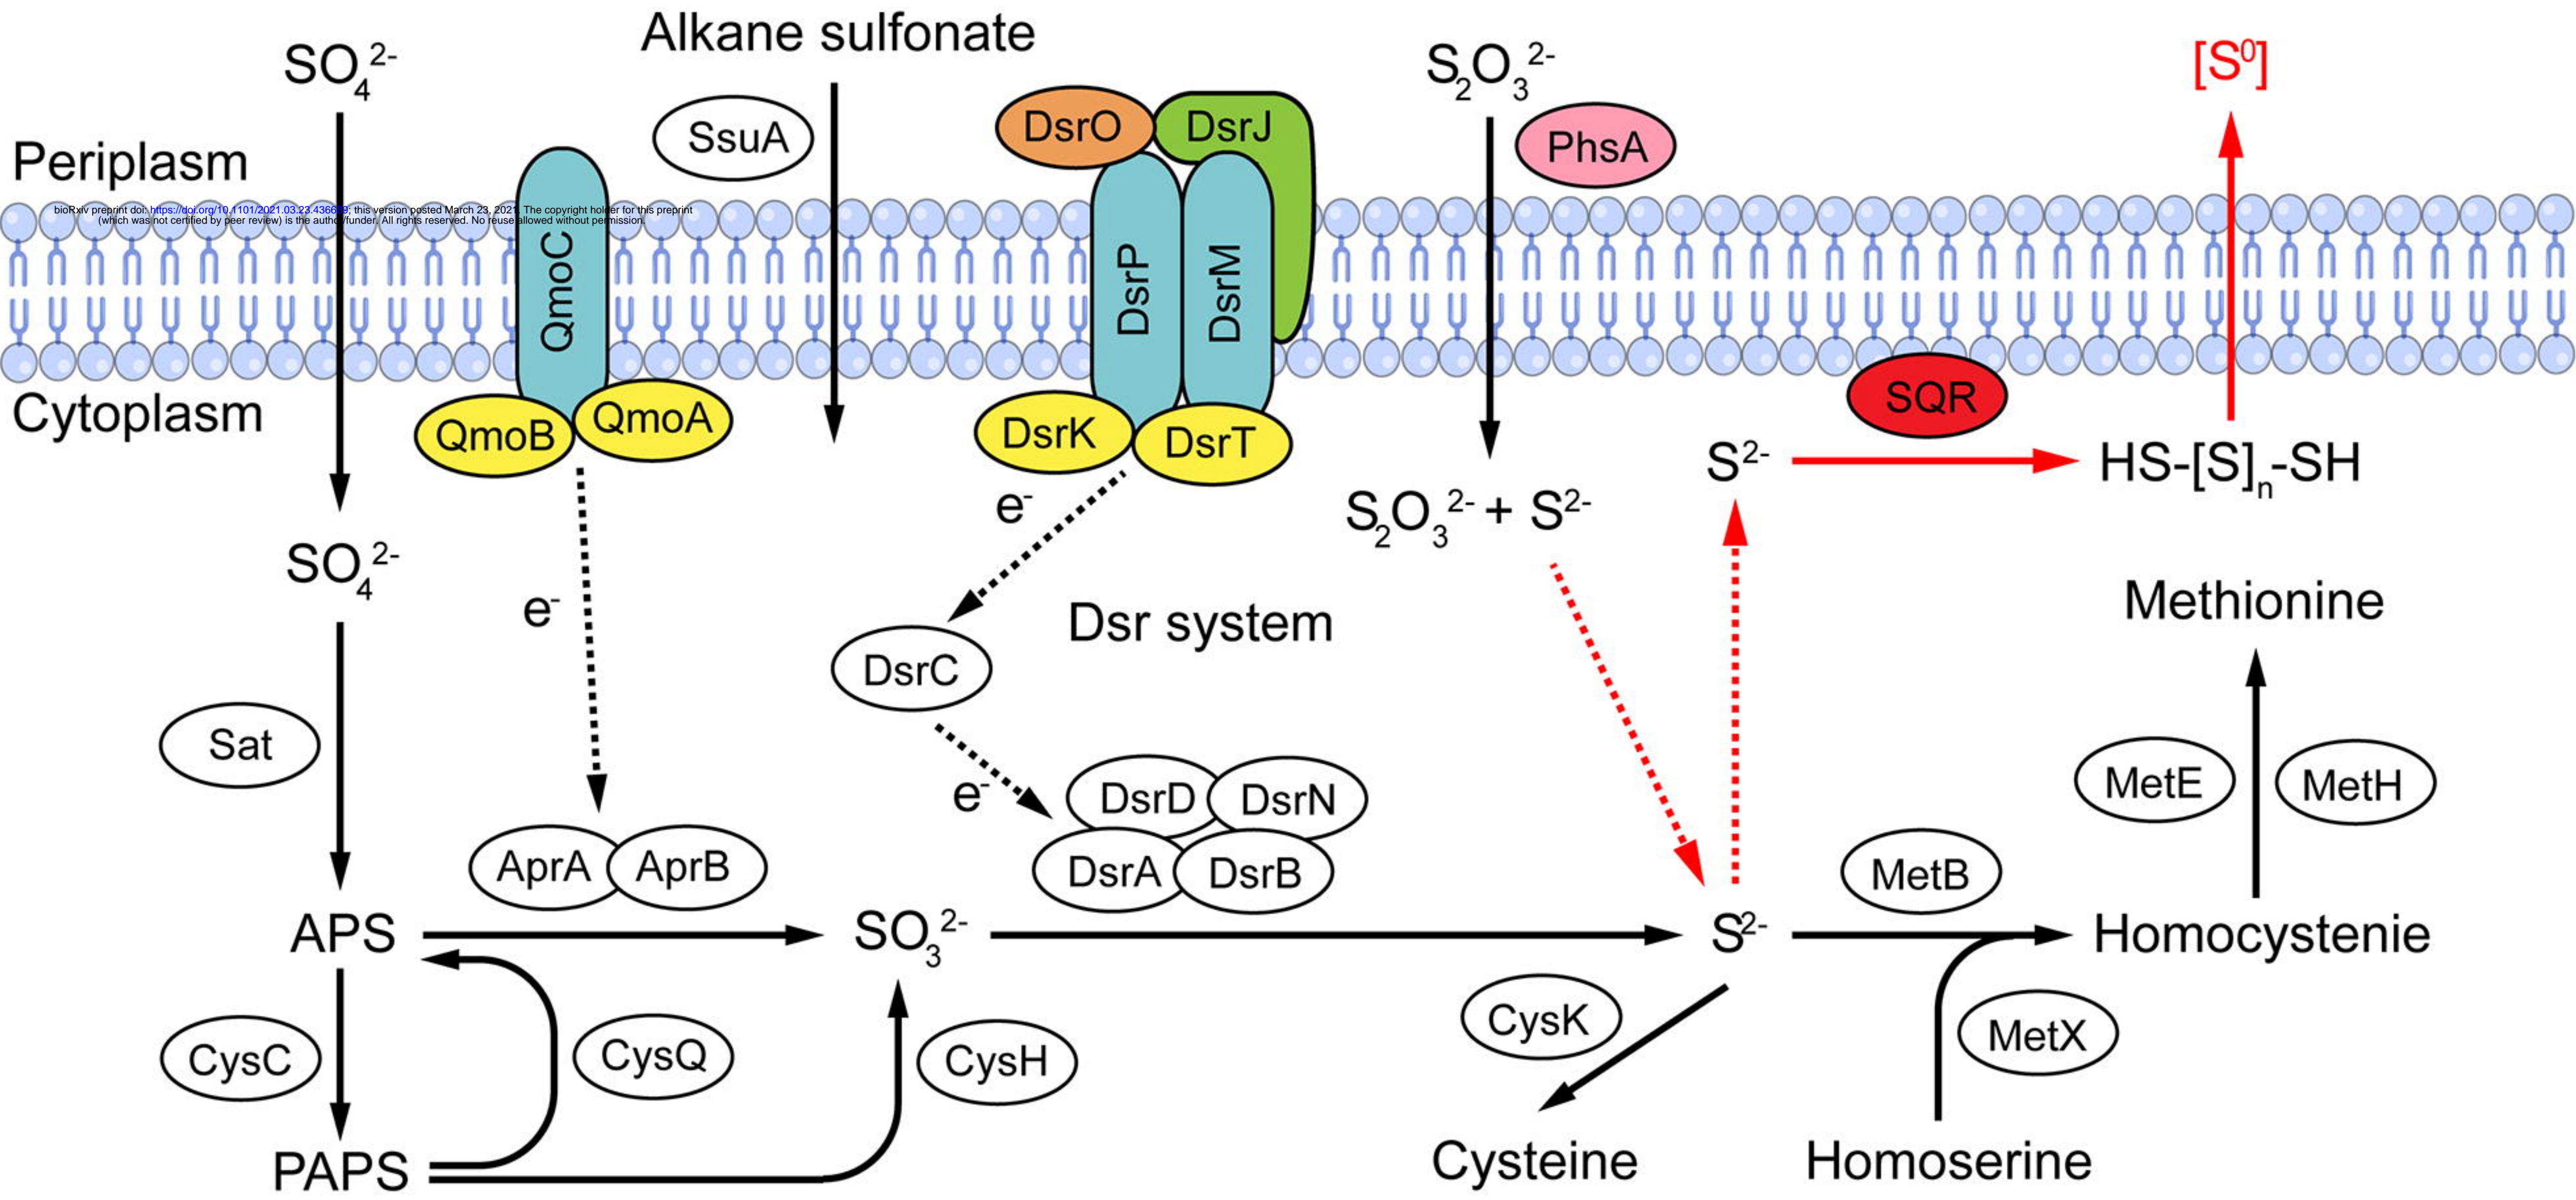

Source: https://biorxiv.org/content/10.1101/2021.03.23.436689v1.full.pdf
